# Supplementary material for: Phenylthiazoles with potent & optimum selectivity toward Clostridium difficile
Source: Royal Society of Chemistry journal article supplement (doi:10.1039/d4md00164h), 2024-01-01
Supplement: d4md00164h1.pdf [file d4md00164h1.pdf]

## Supporting information

Mahmoud M. Seif El-Din<sup>1</sup>, Mohamed Hagra<sup>2\*</sup>, and Abdelrahman S. Mayhoub<sup>1,2\*\*</sup>

1. University of Science and Technology, Nanoscience Program, Zewail City of Science and Technology, Ahmed Zewail Street, Giza, Egypt.
2. Department of Pharmaceutical Organic Chemistry, College of Pharmacy, Al-Azhar University, Cairo, Egypt.

Dr\_MohammedHagress-Ruk7\_PROTON\_01  
Dr\_MohammedHagress-Ruk7

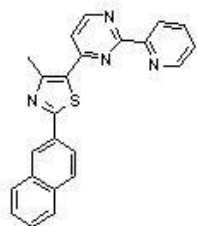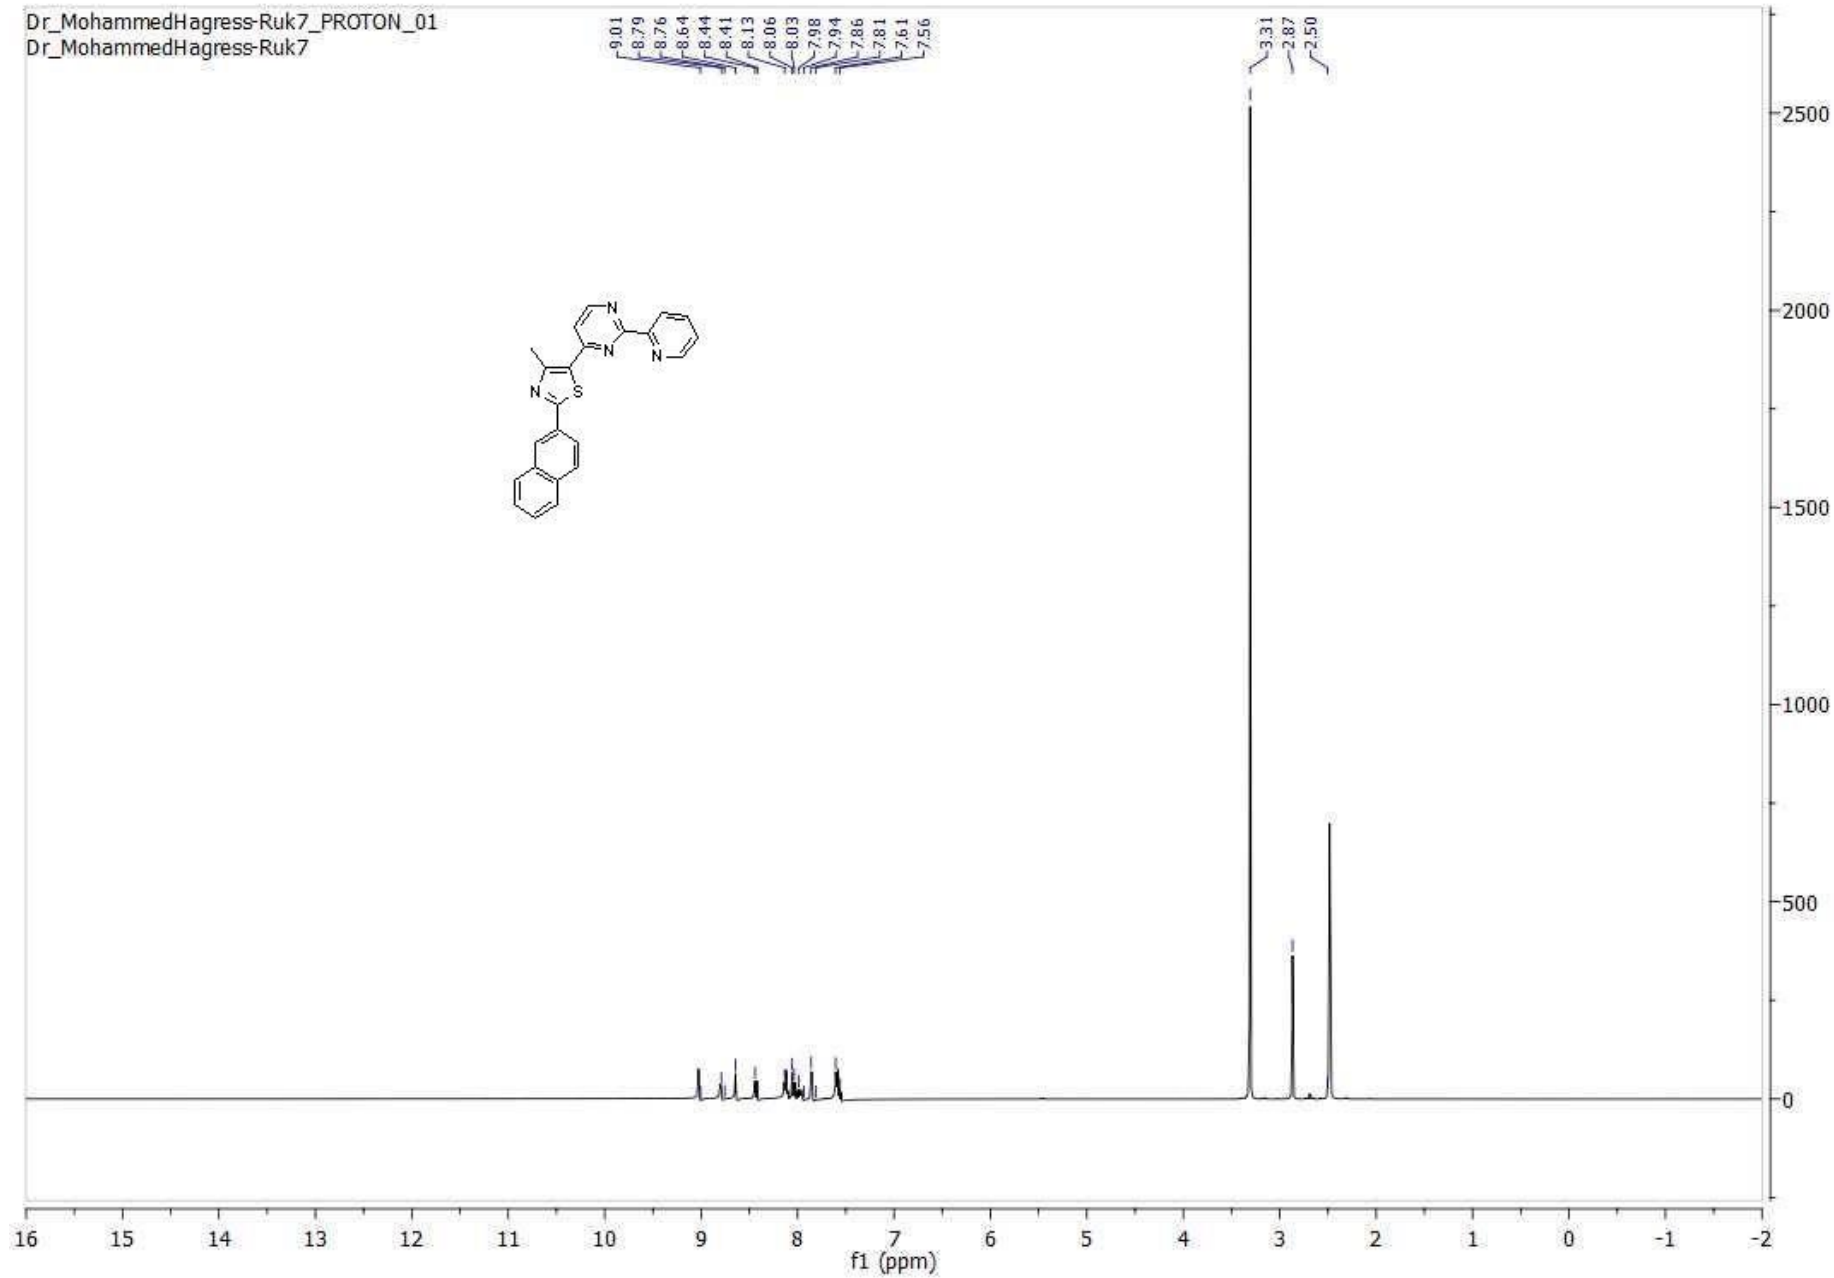

Dr\_MohammedHagress-Ruk7\_CARBON\_01  
Dr\_MohammedHagress-Ruk7

167.80  
163.60  
159.27  
158.20  
155.10  
154.77  
150.24  
137.60  
133.30  
129.42  
129.26  
128.22  
127.57  
126.56  
124.02  
123.84

40.60  
40.39  
40.18  
39.97  
39.76  
39.55  
39.34

18.85

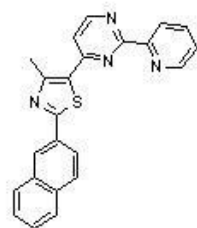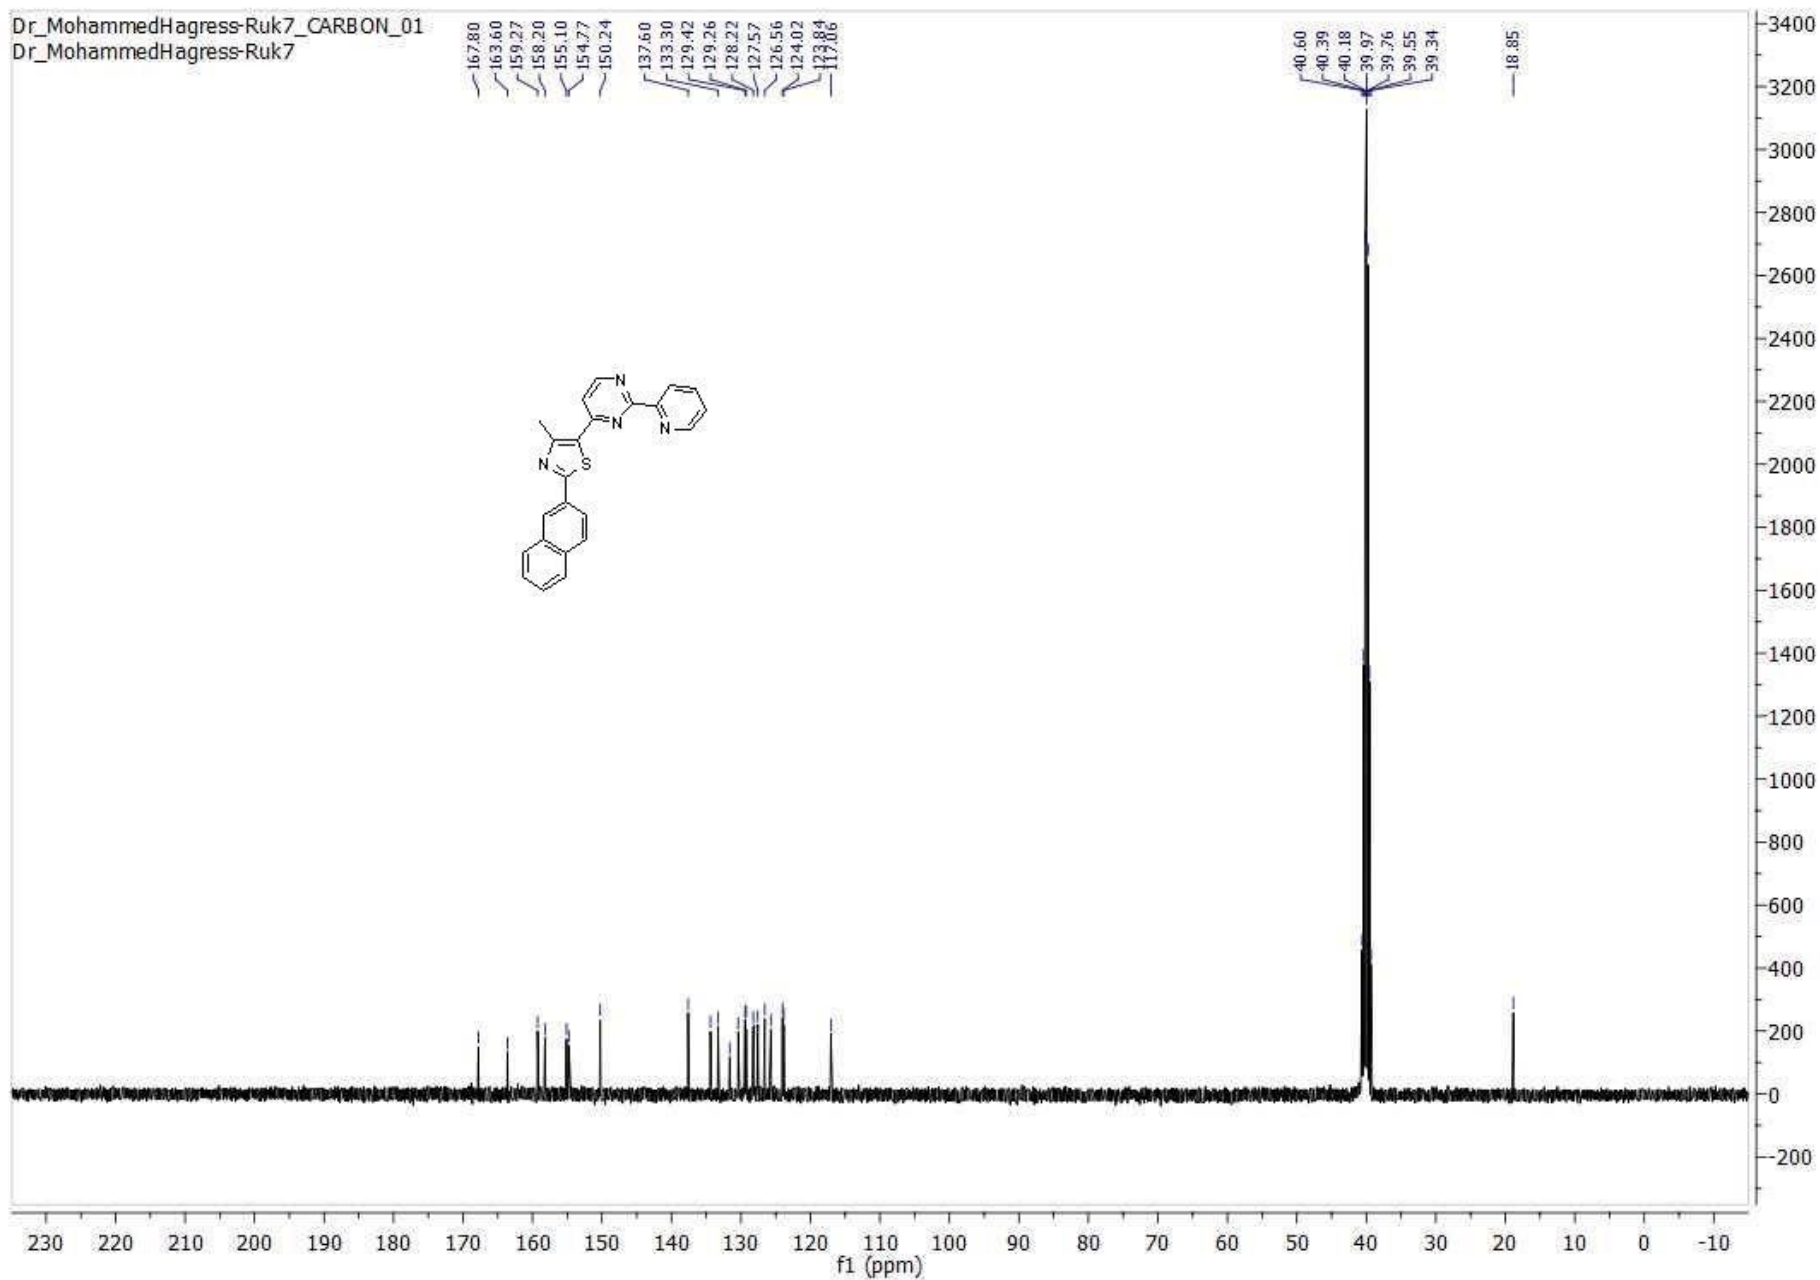

Dr\_MohammedHagress-Ruk3\_PROTON\_02  
Dr\_MohammedHagress-Ruk3

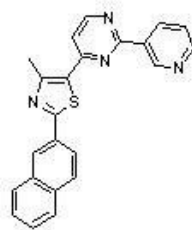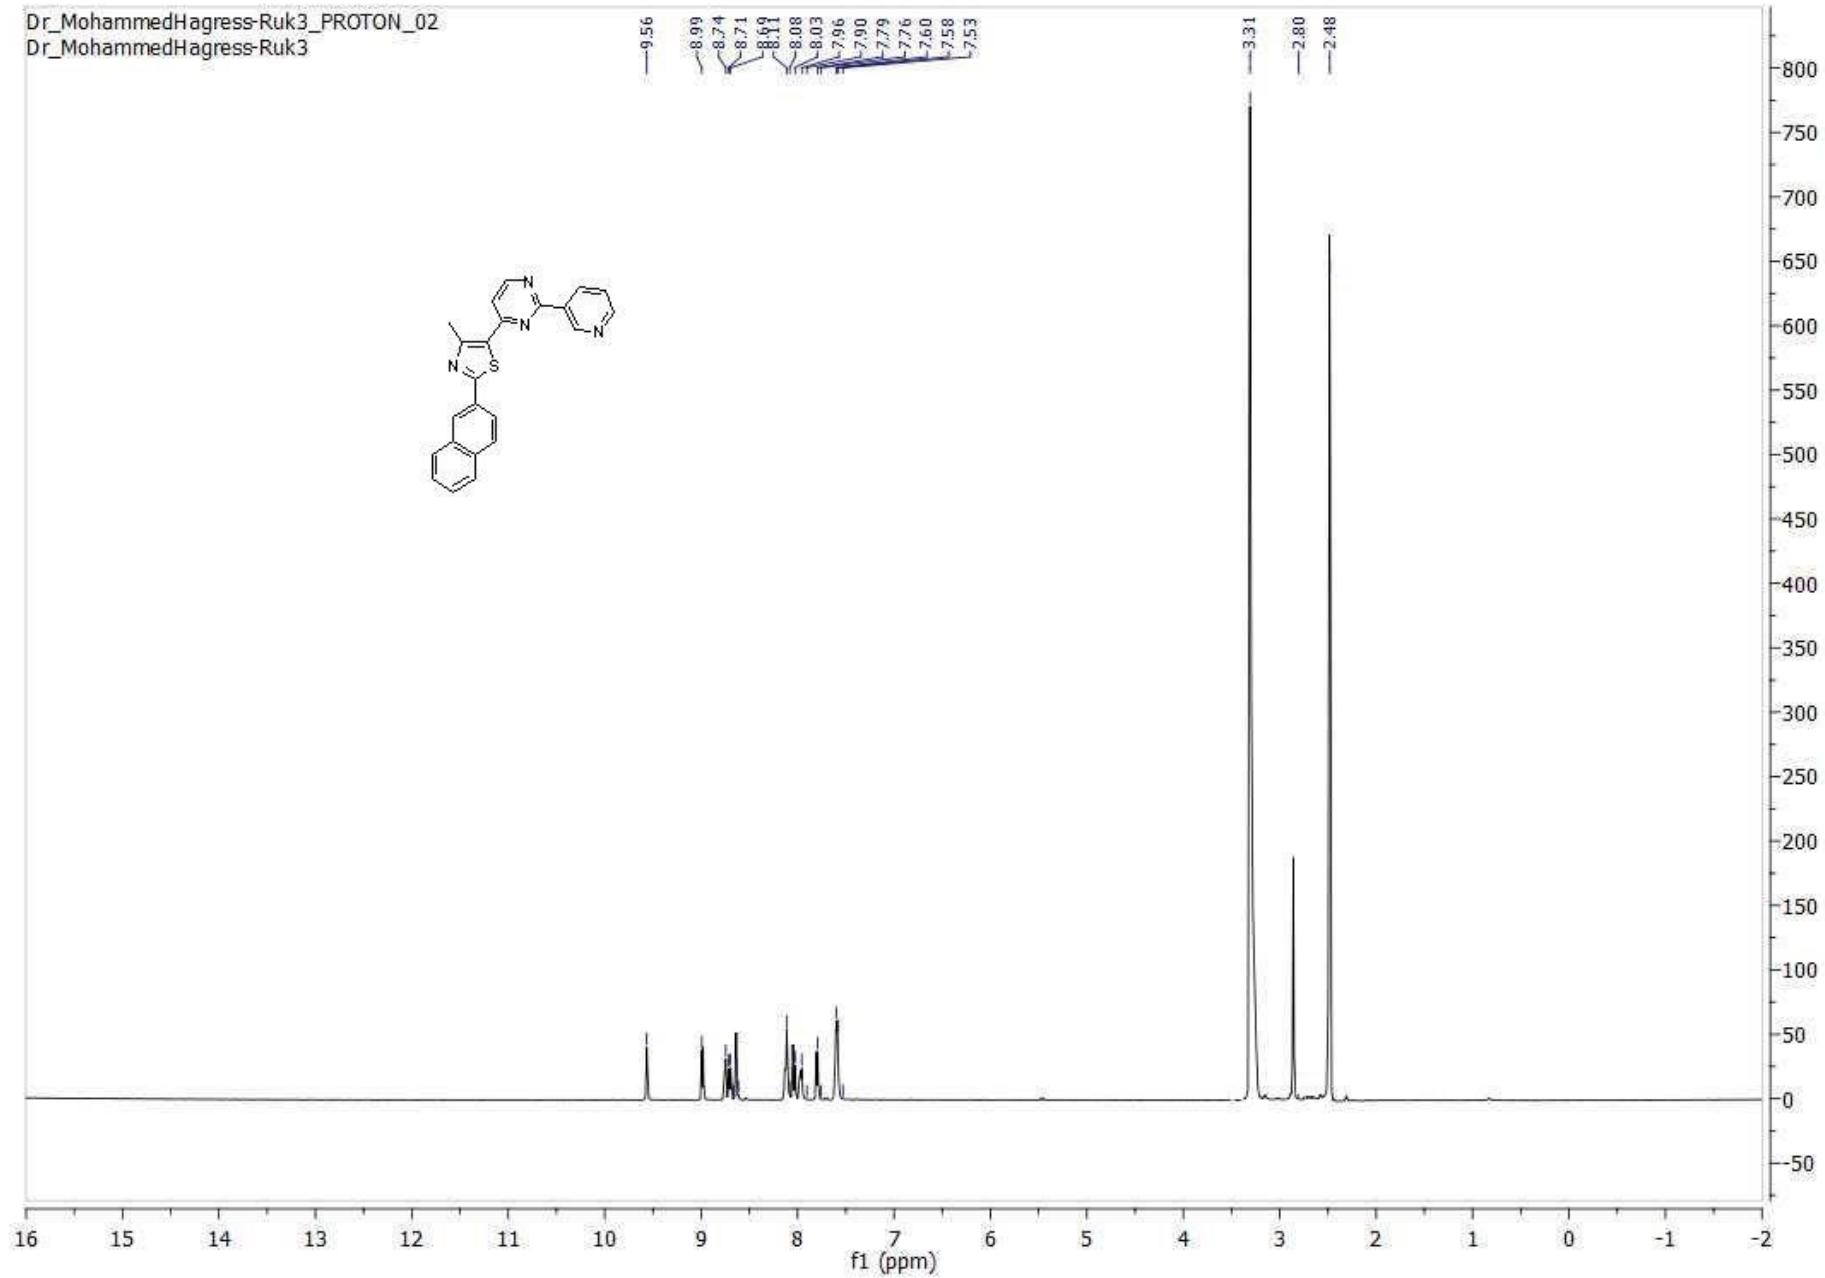

Dr\_MohammedHagress-Ruk3\_CARBON\_02  
Dr\_MohammedHagress-Ruk3

169.48  
164.60  
159.71  
159.39  
152.46  
149.32  
133.28  
131.25  
130.32  
129.43  
129.33  
129.26  
129.15  
128.22  
128.10  
127.59  
127.51  
126.58  
126.25  
123.84  
121.95  
117.52

40.59  
40.38  
40.17  
39.96  
39.75  
39.55  
39.34

18.76

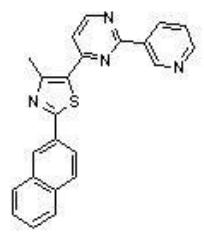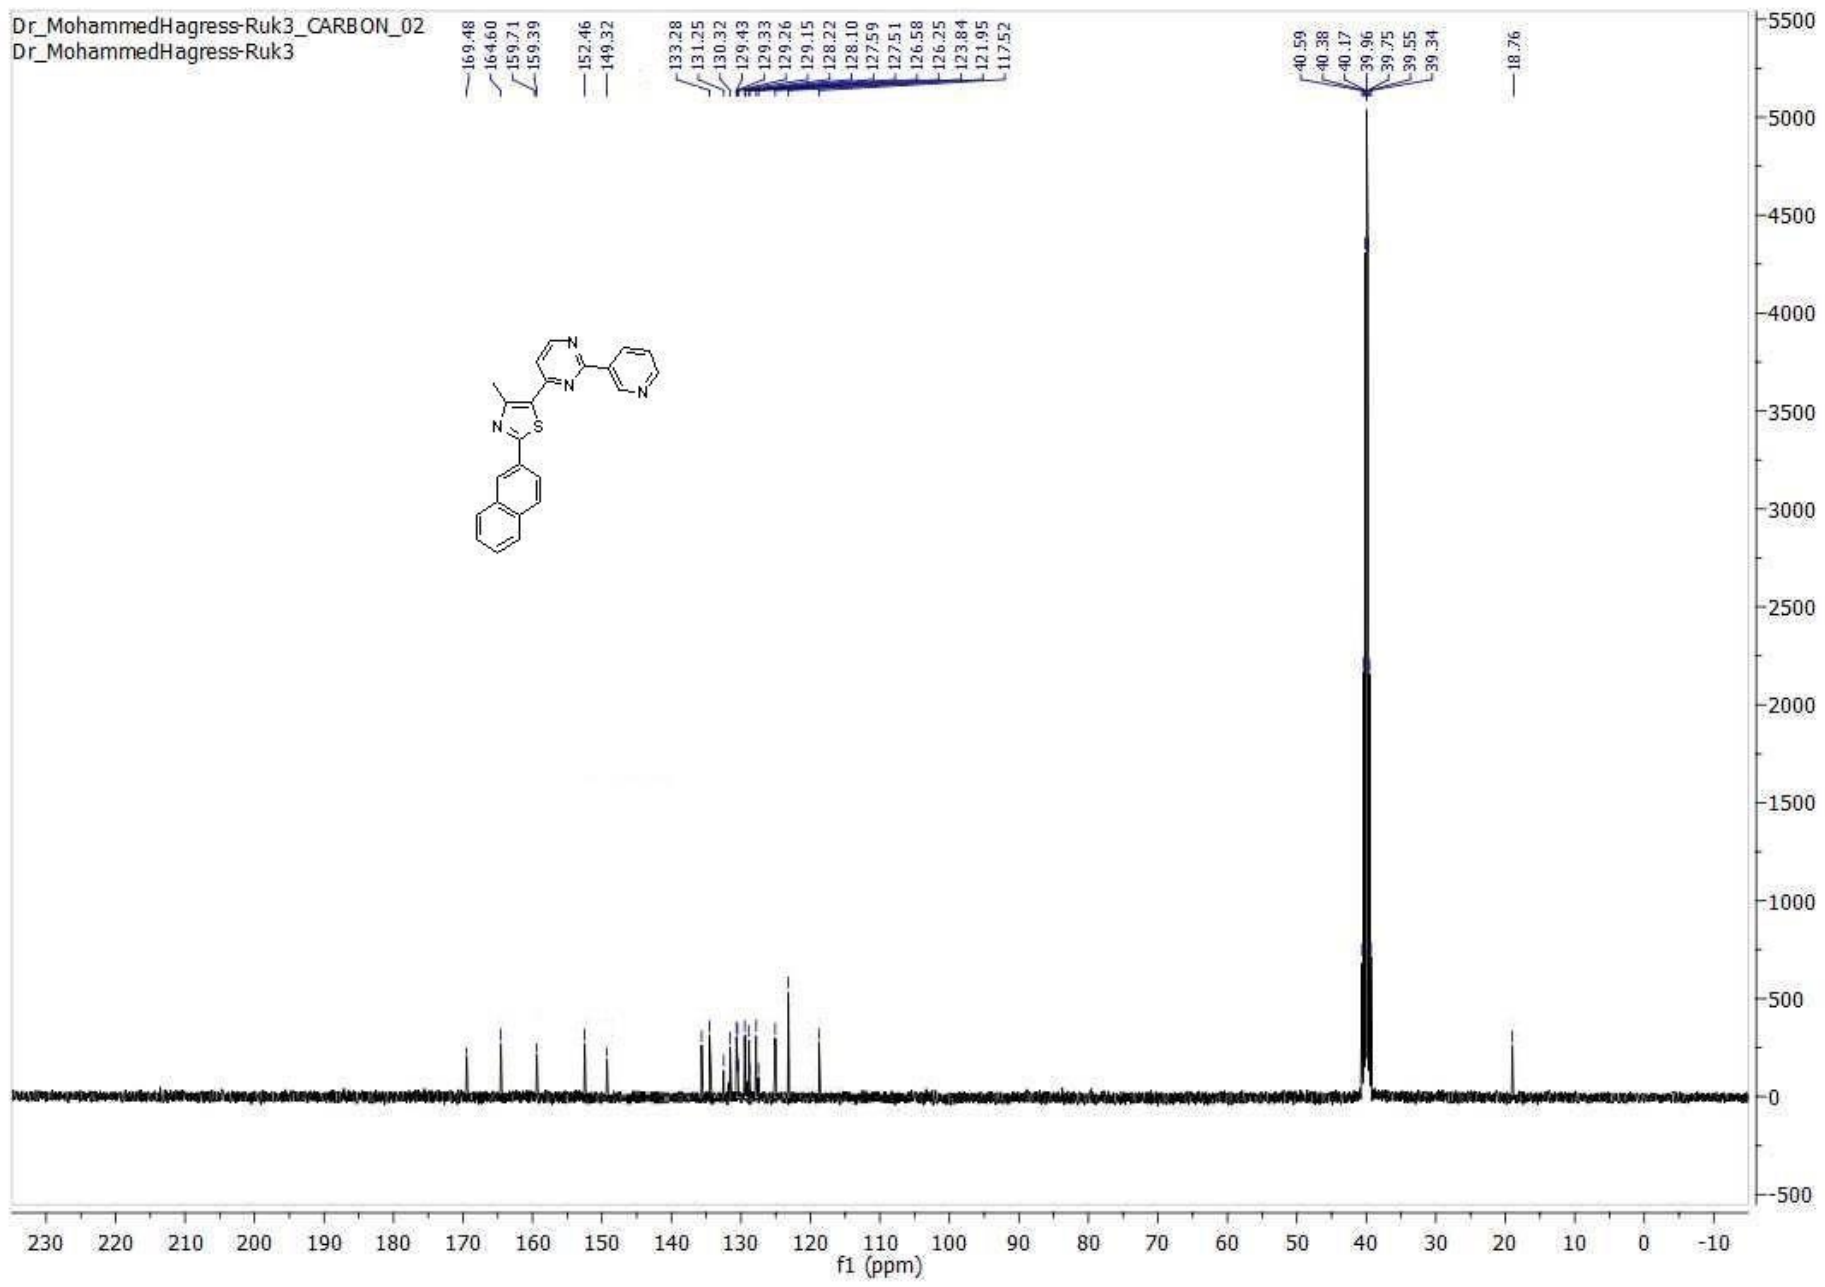

Dr\_MohammedHagress-Ruk8\_PROTON\_01  
Dr\_MohammedHagress-Ruk8

9.00  
8.98  
8.82  
8.81  
8.61  
8.33  
8.30  
8.11  
8.05  
8.03  
7.91  
7.88  
7.86  
7.83  
7.58  
7.53

3.31  
2.86  
2.48

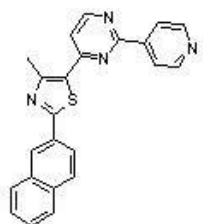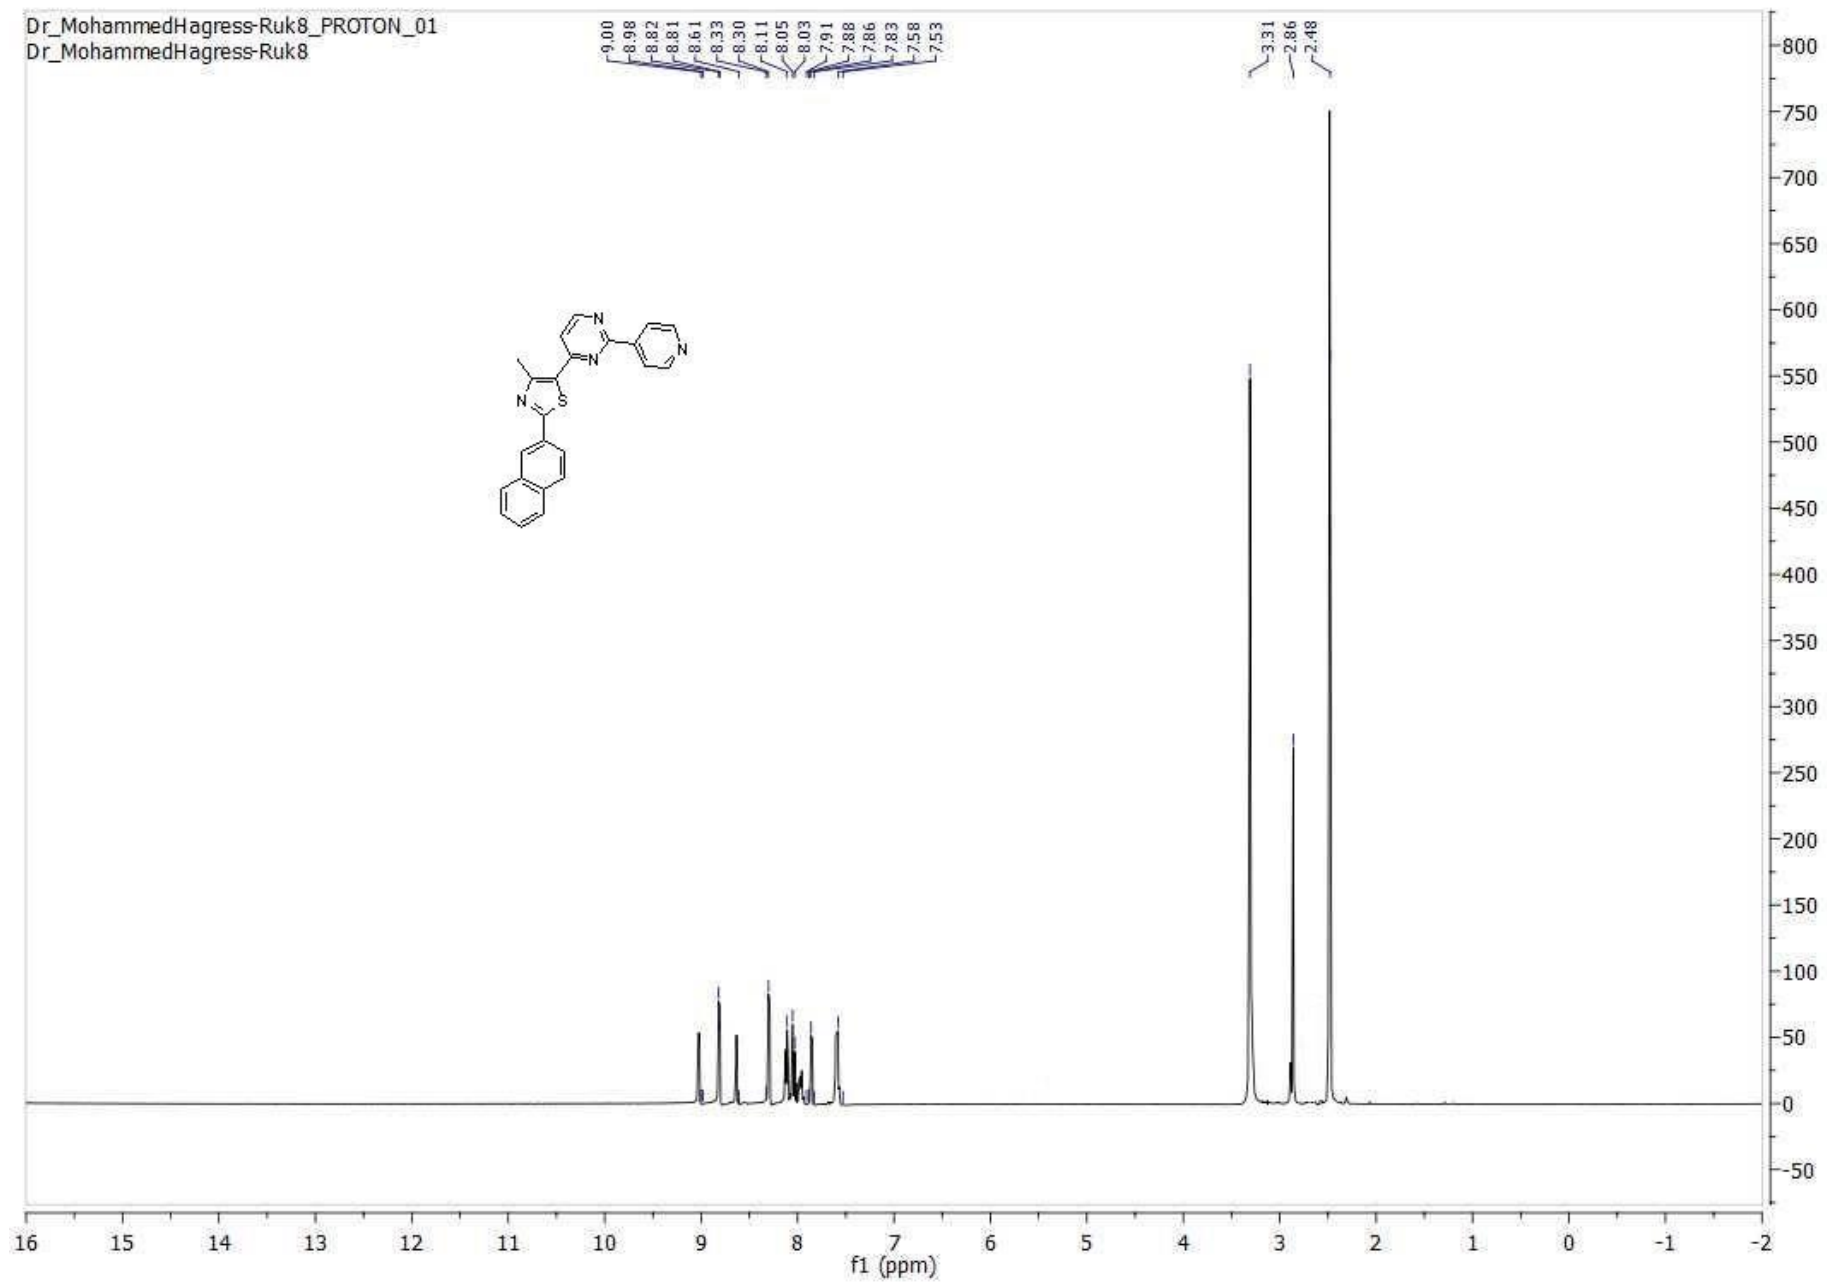

Dr\_MohammedHagress-Ruk8\_CARBON\_01  
Dr\_MohammedHagress-Ruk8

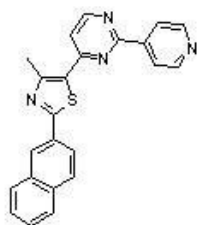

168.00  
161.95  
159.41  
158.32  
155.47  
151.07  
144.35  
134.42  
133.28  
131.25  
129.43  
129.33  
128.22  
128.10  
127.59  
126.58  
126.25  
123.84  
121.95  
117.52

40.60  
40.43  
40.39  
40.22  
39.18  
39.97  
39.76  
39.55  
39.34  
18.95

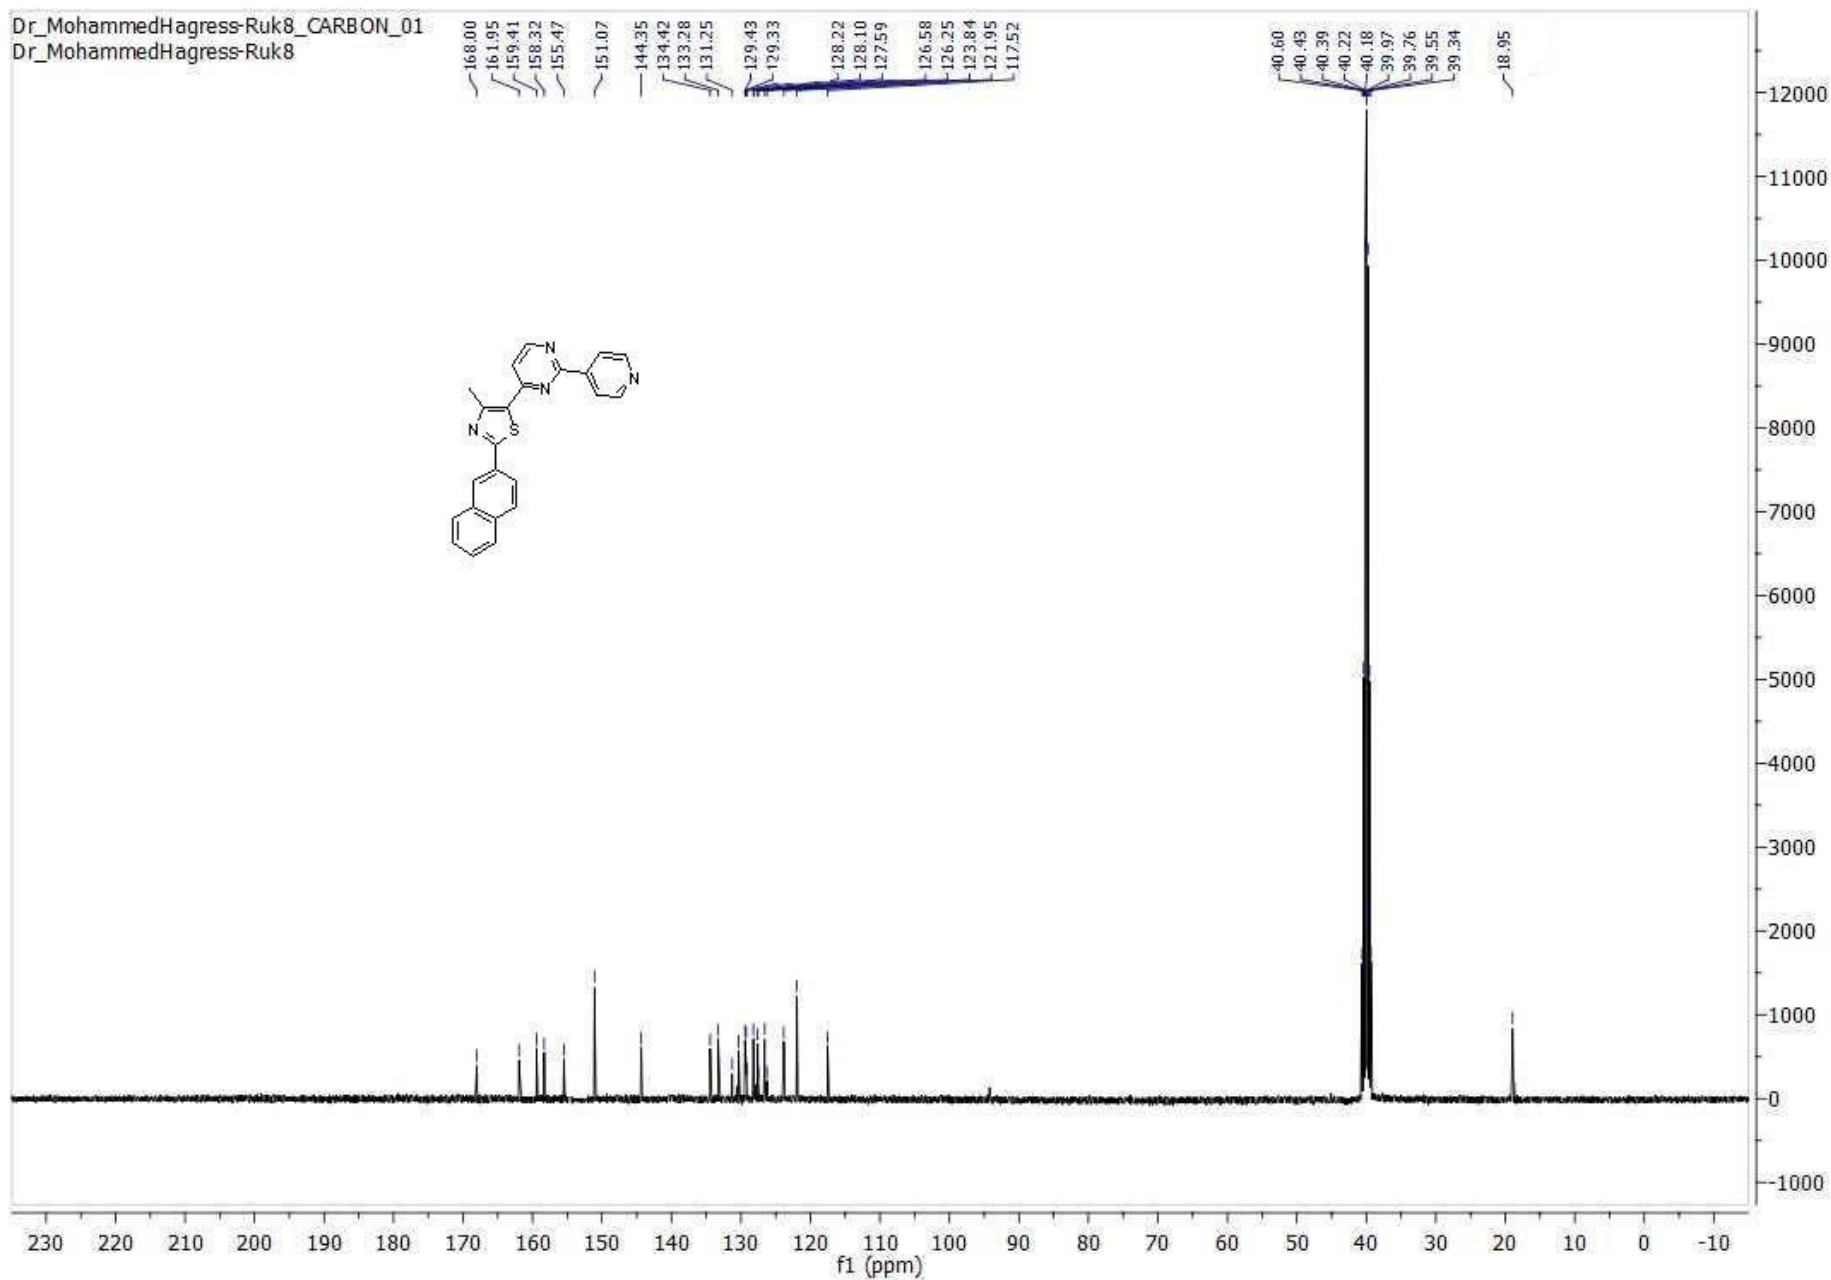

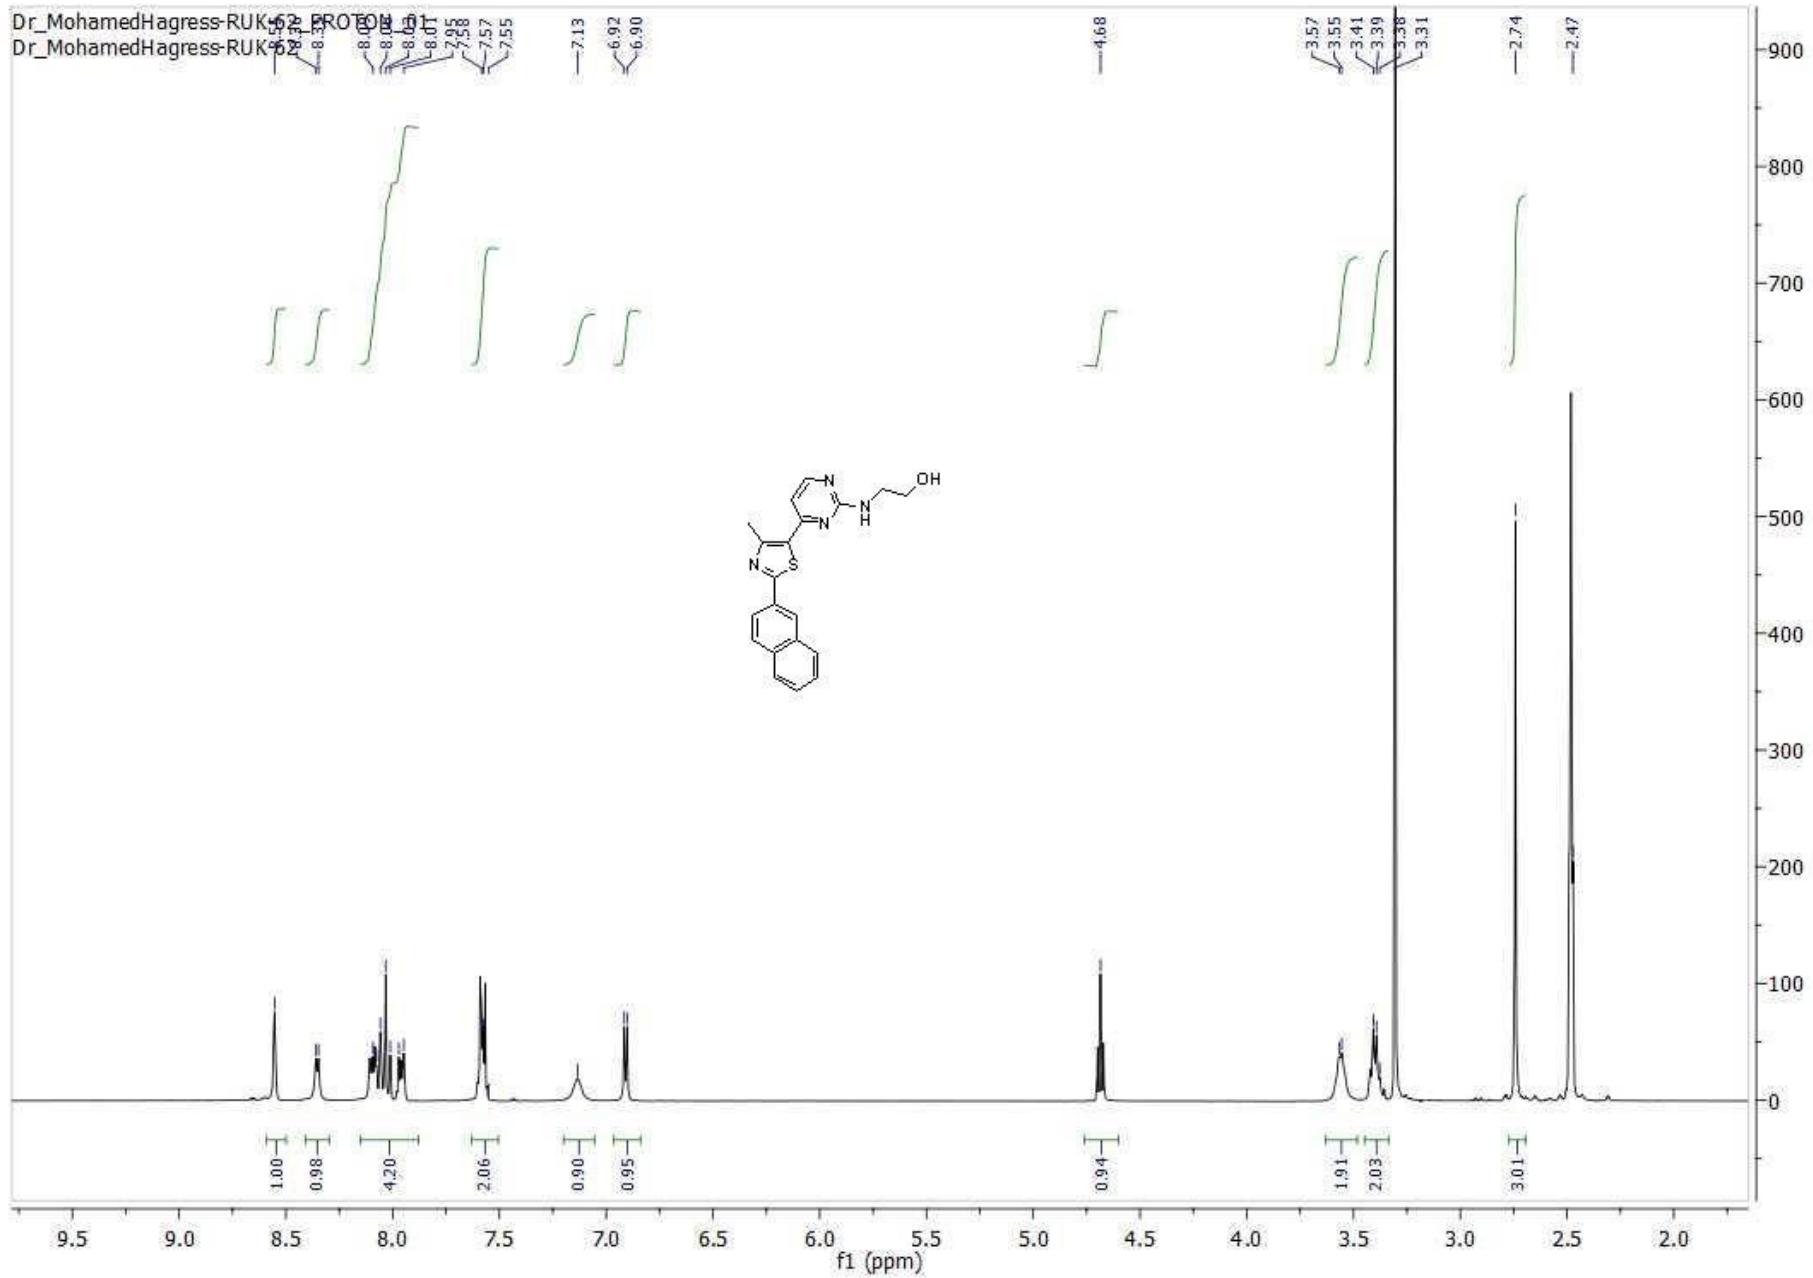



Dr\_MohamedHagress-RUK-62\_CARBON\_01  
Dr\_MohamedHagress-RUK-62

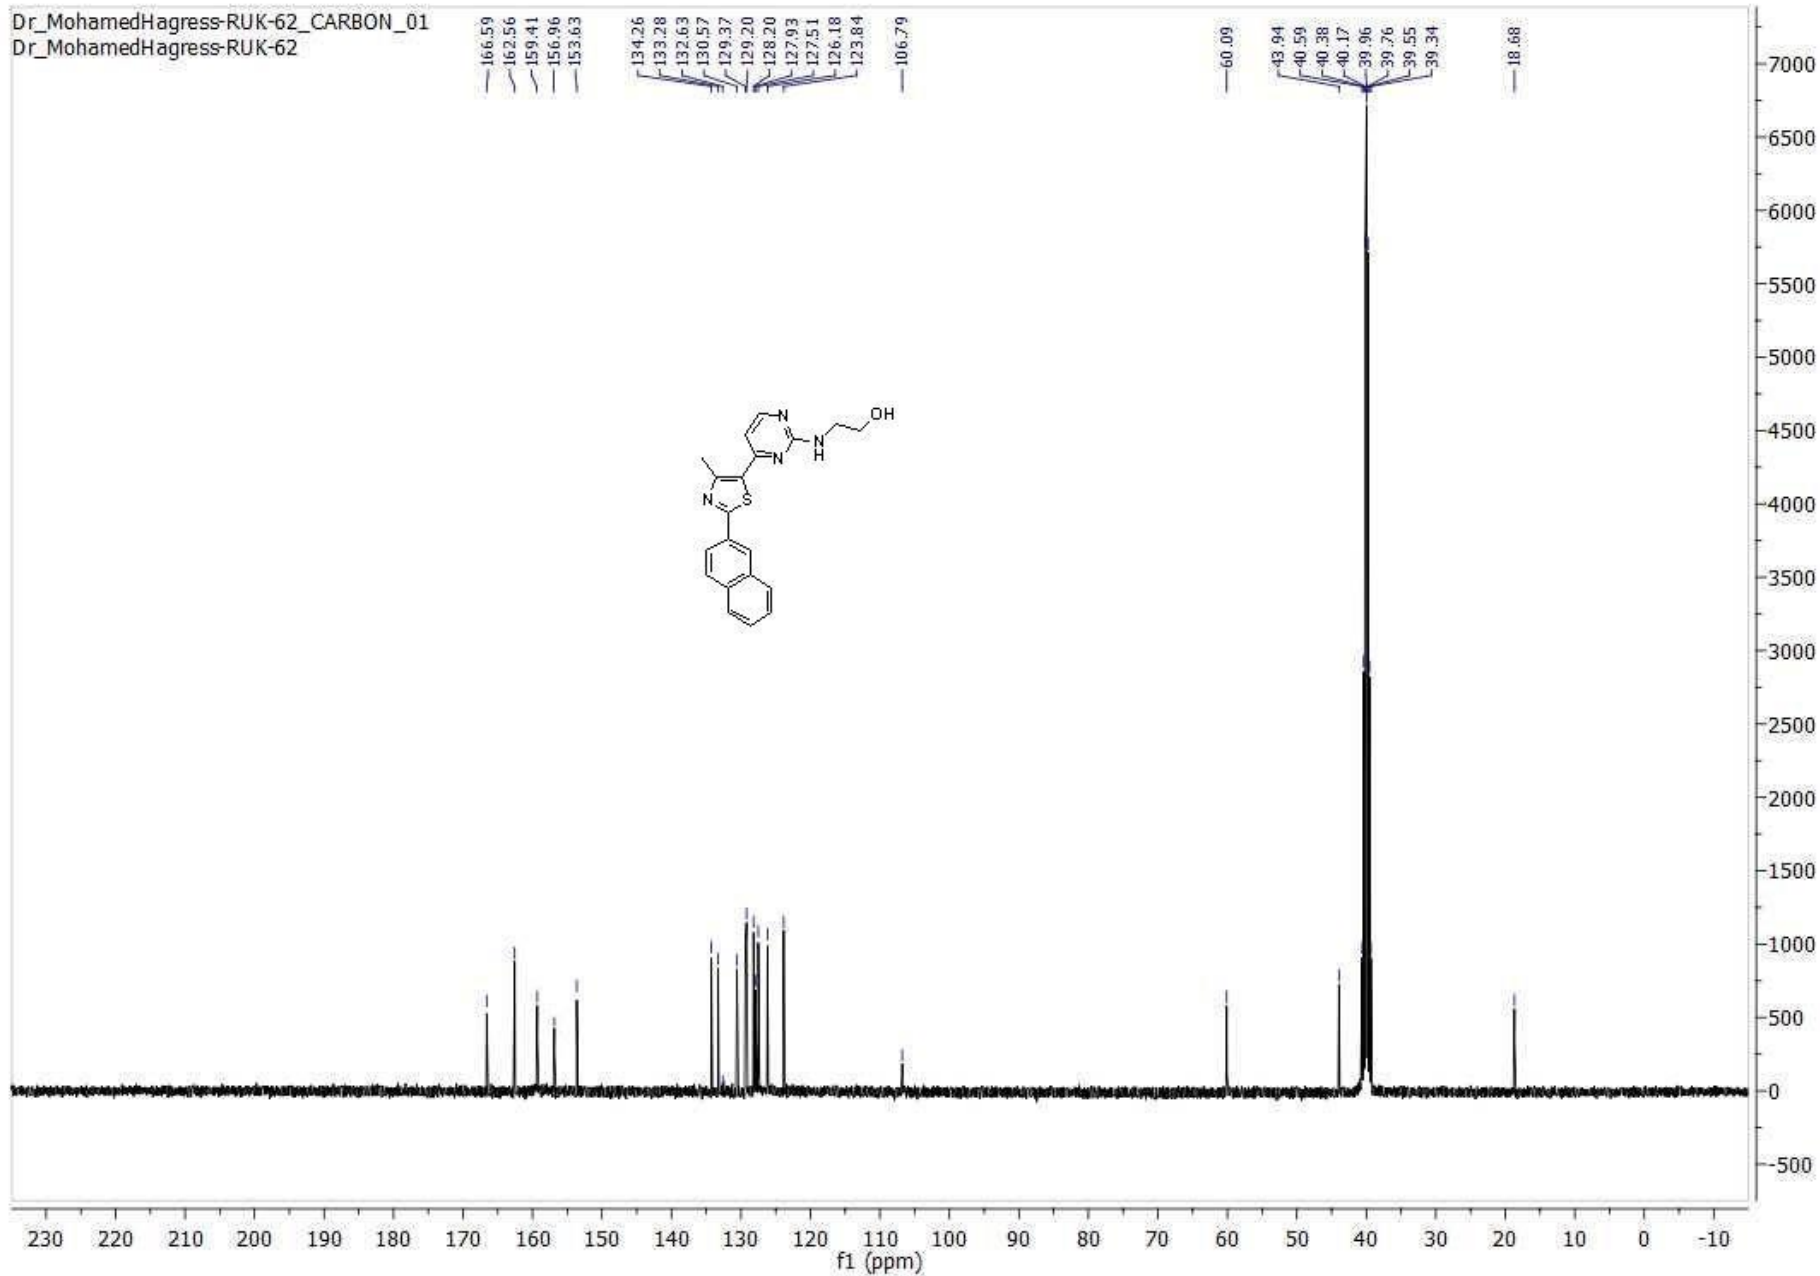

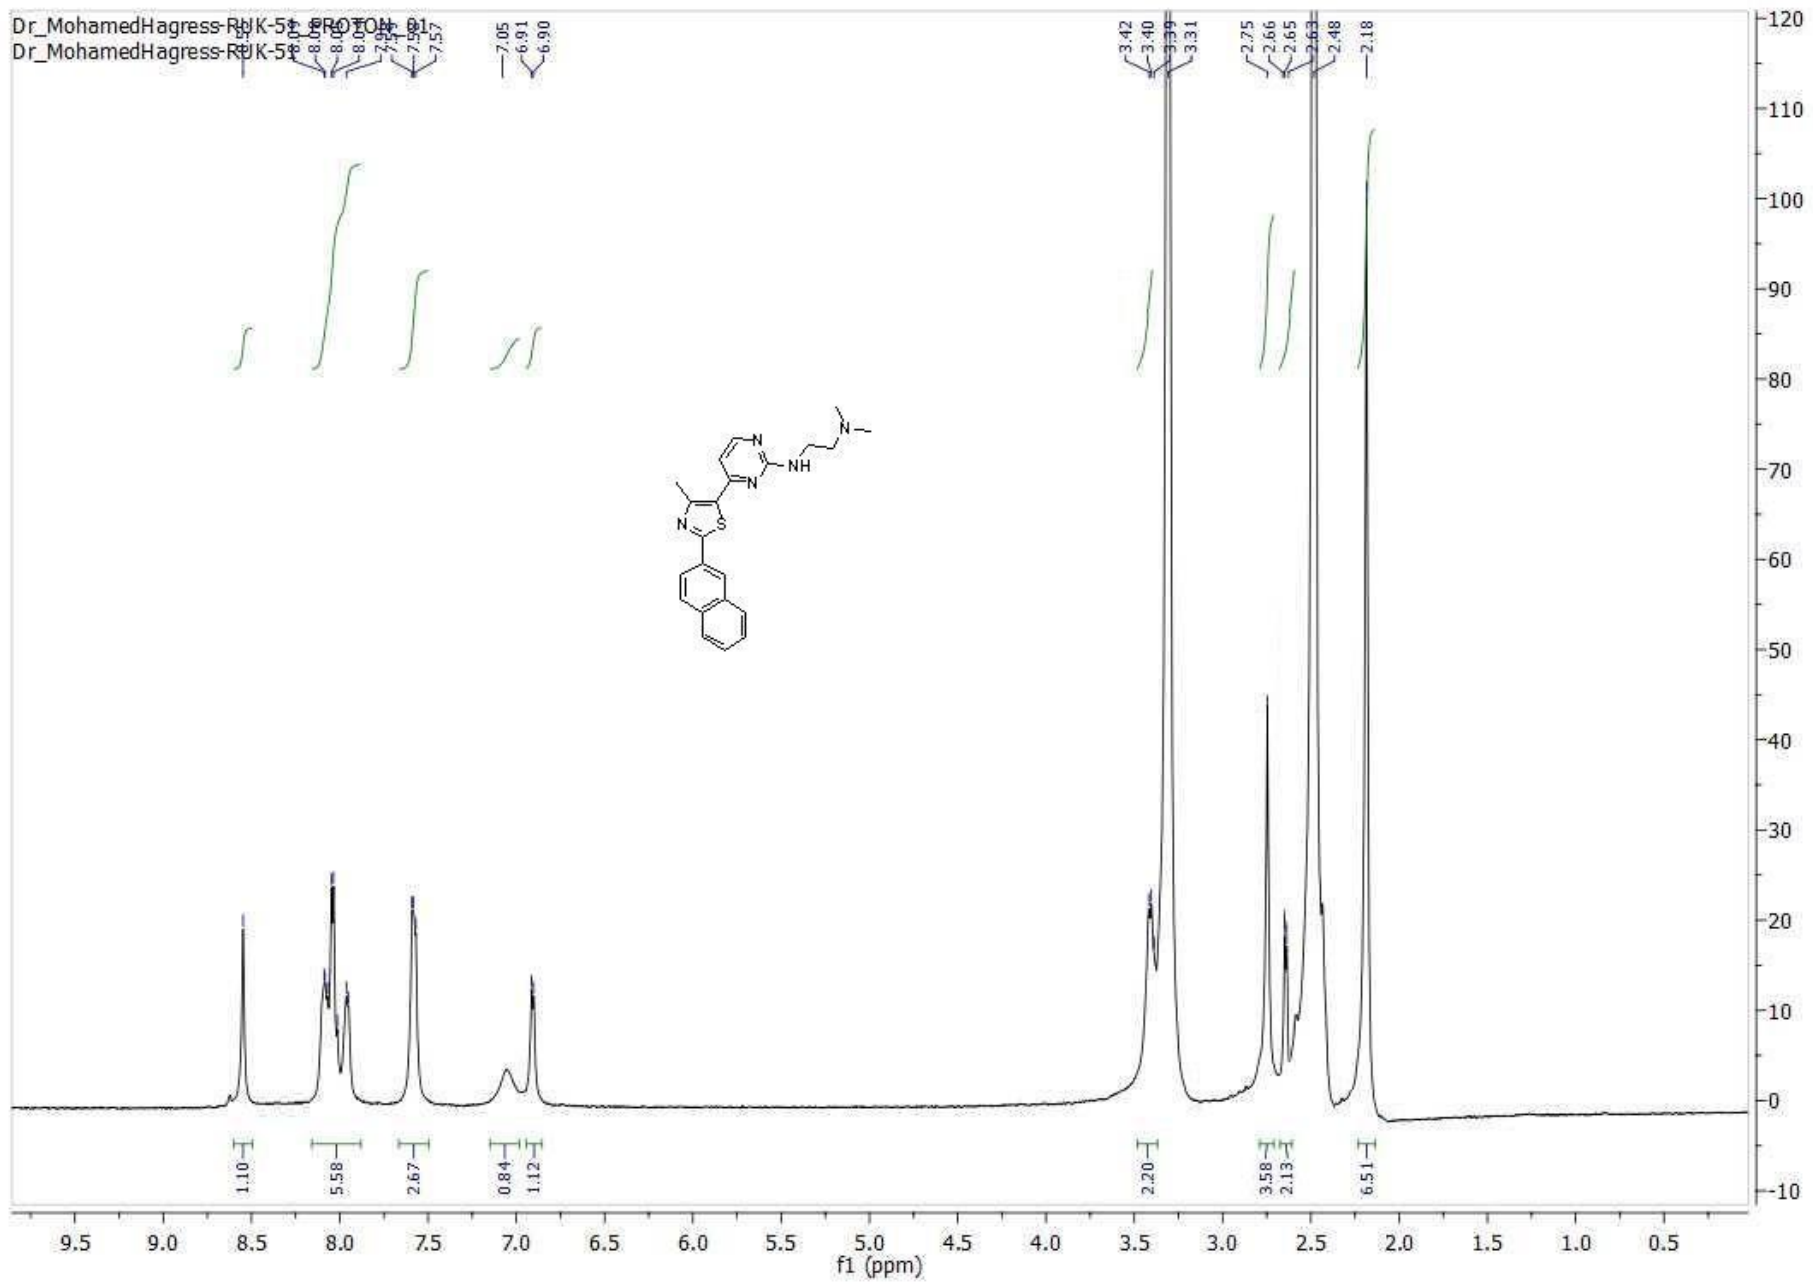

Dr\_MohamedHagress-RUK-51\_CARBON\_01  
Dr\_MohamedHagress-RUK-51

166.63  
162.44  
159.71  
157.27  
153.09  
134.26  
133.28  
131.91  
130.57  
129.40  
129.21  
128.21  
127.94  
127.53  
126.16  
123.83  
106.56

58.47  
45.77  
40.59  
40.38  
40.17  
39.96  
39.70  
39.55  
39.34  
39.17  
18.69

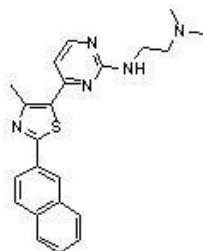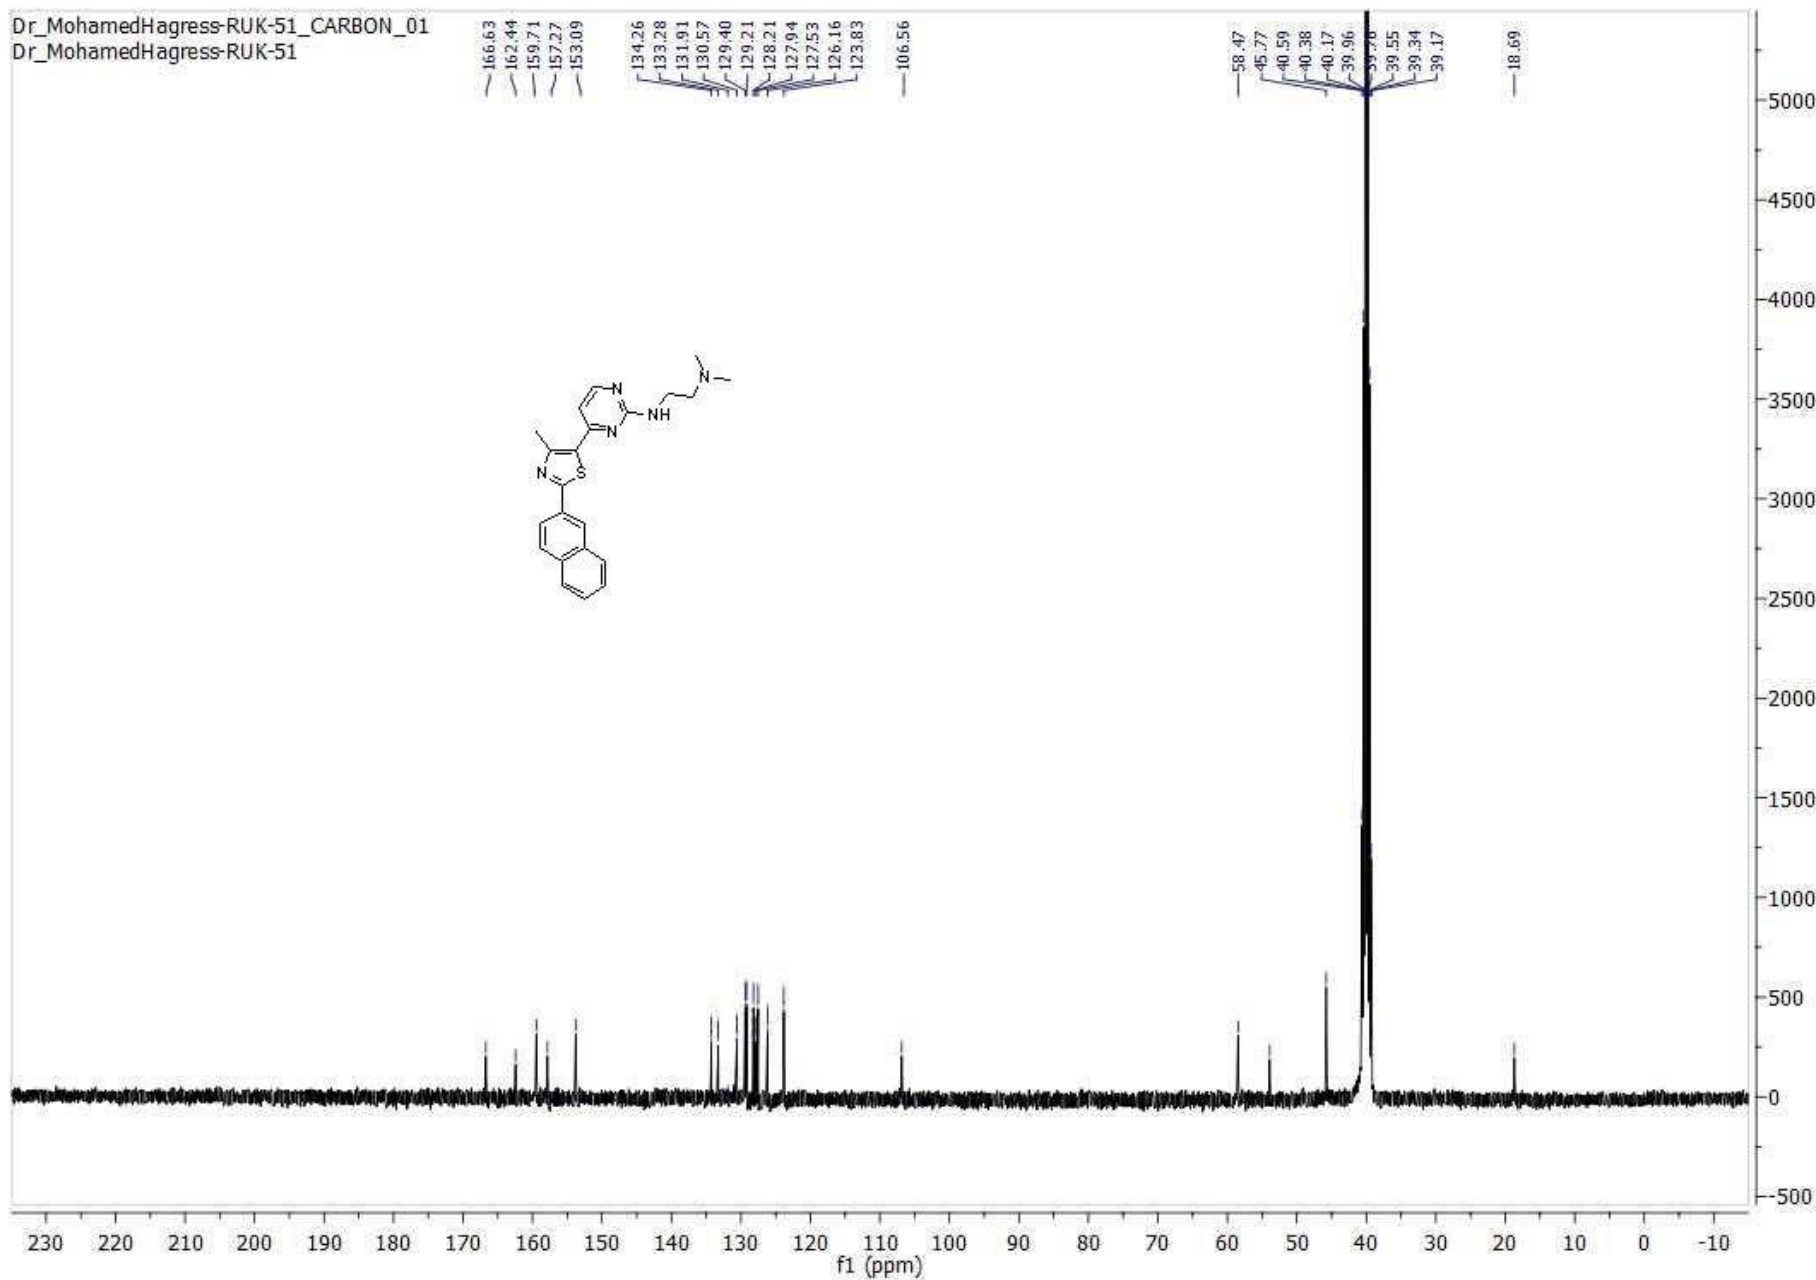

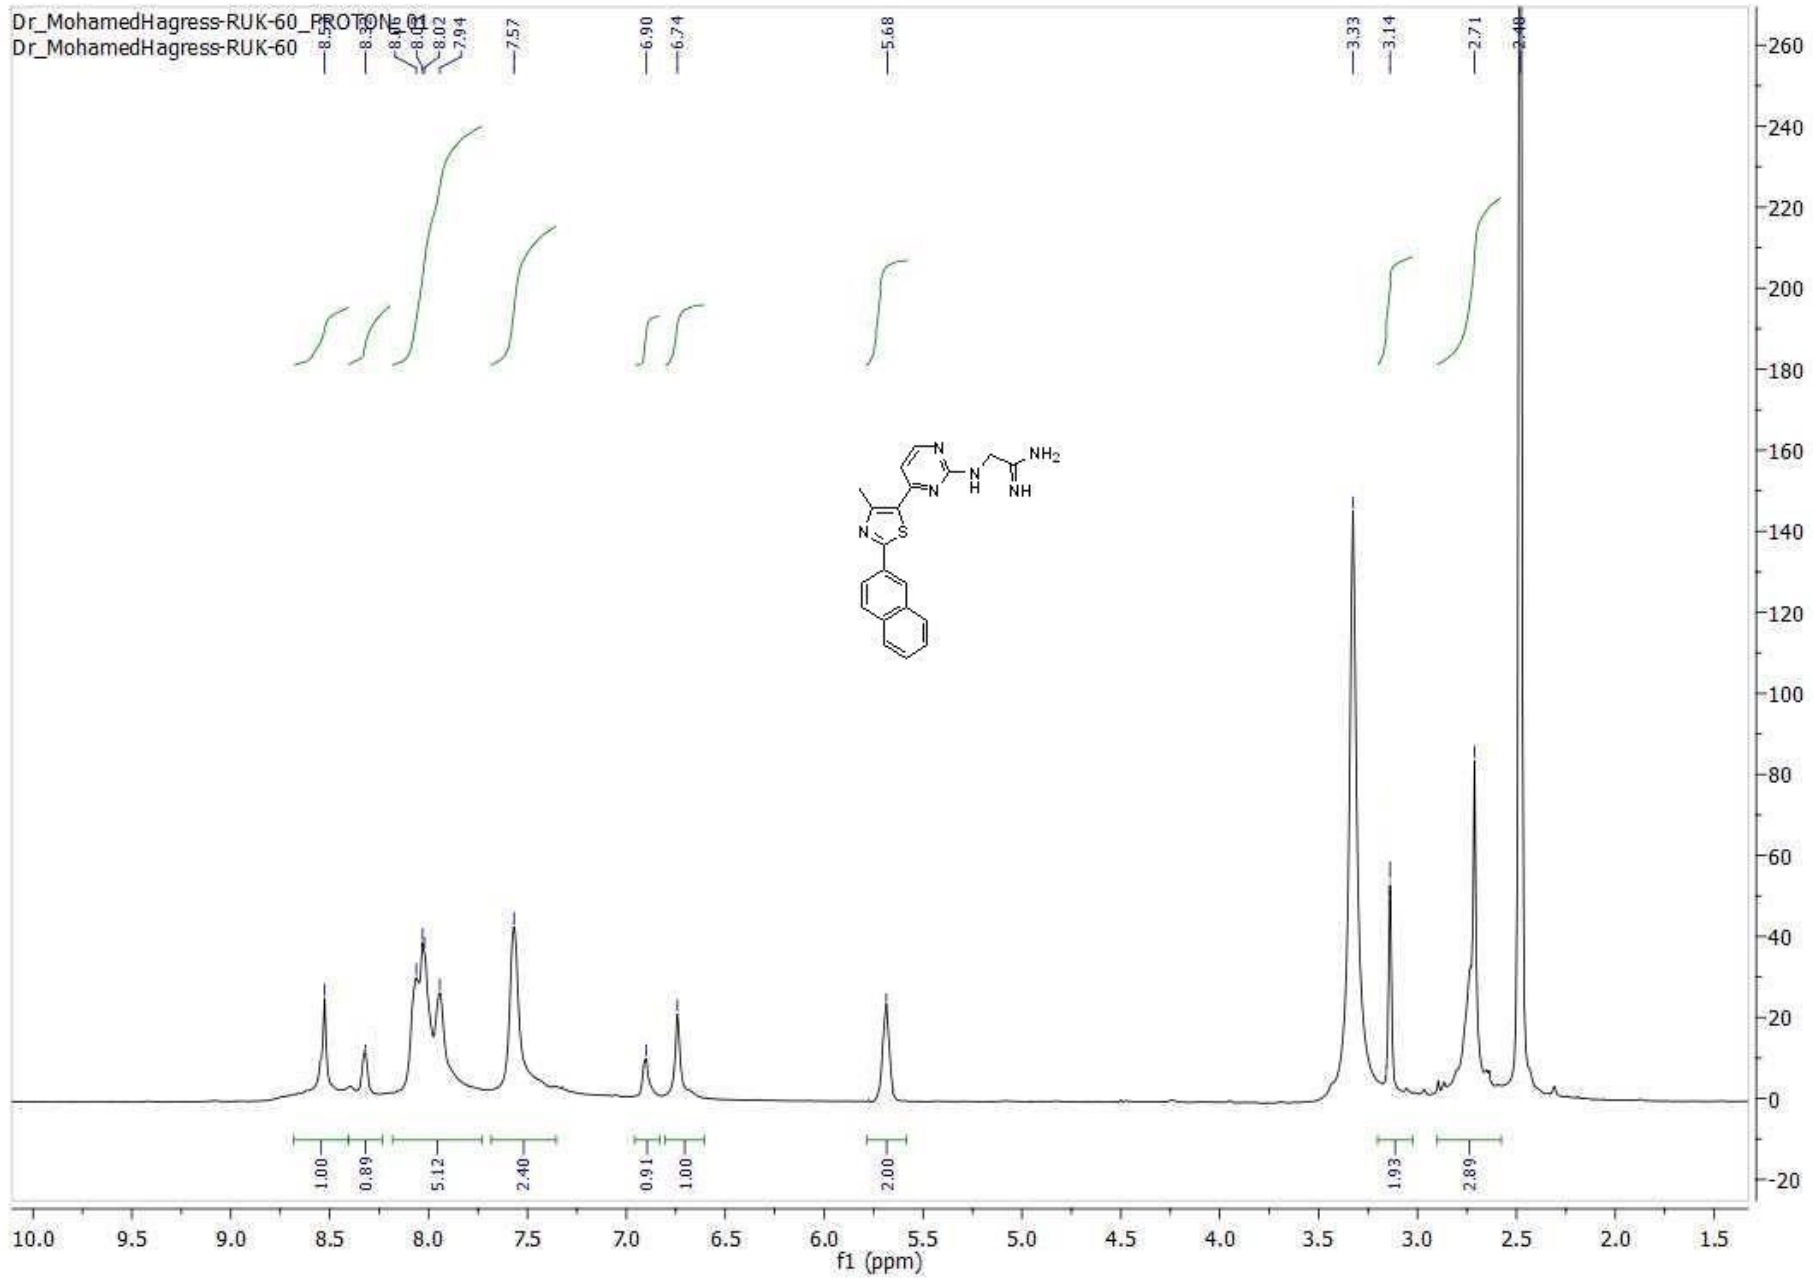

Dr\_MohamedHagress-RUK-60\_CARBON\_01  
Dr\_MohamedHagress-RUK-60

166.53  
163.81  
161.85  
159.66  
158.26  
153.42  
134.23  
133.26  
132.51  
130.58  
129.37  
129.20  
128.84  
127.73  
126.91  
126.14  
123.80  
106.99

40.59  
40.38  
40.17  
39.76  
39.55  
39.34  
36.95  
18.61

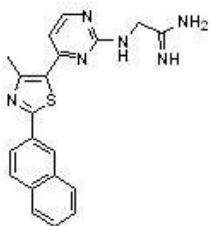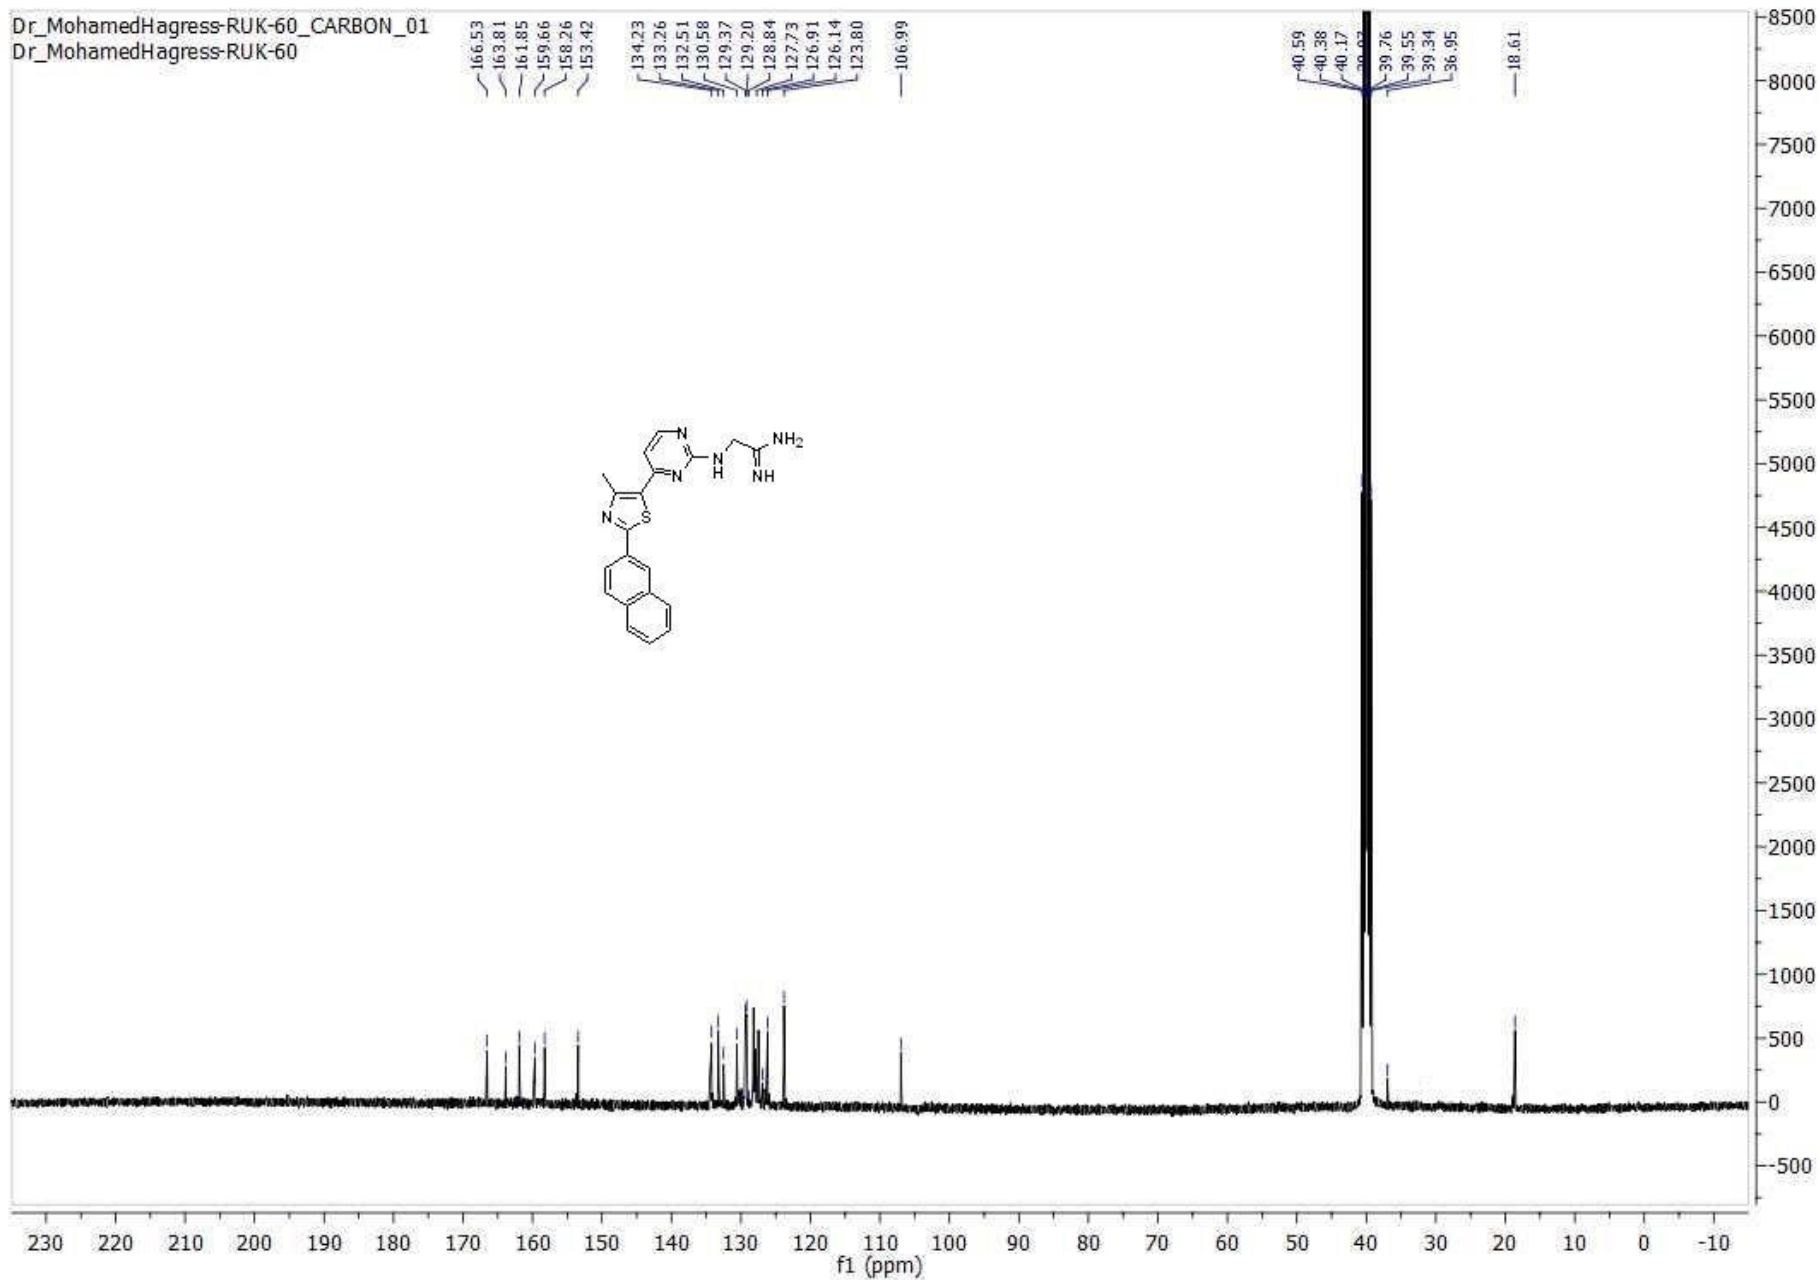

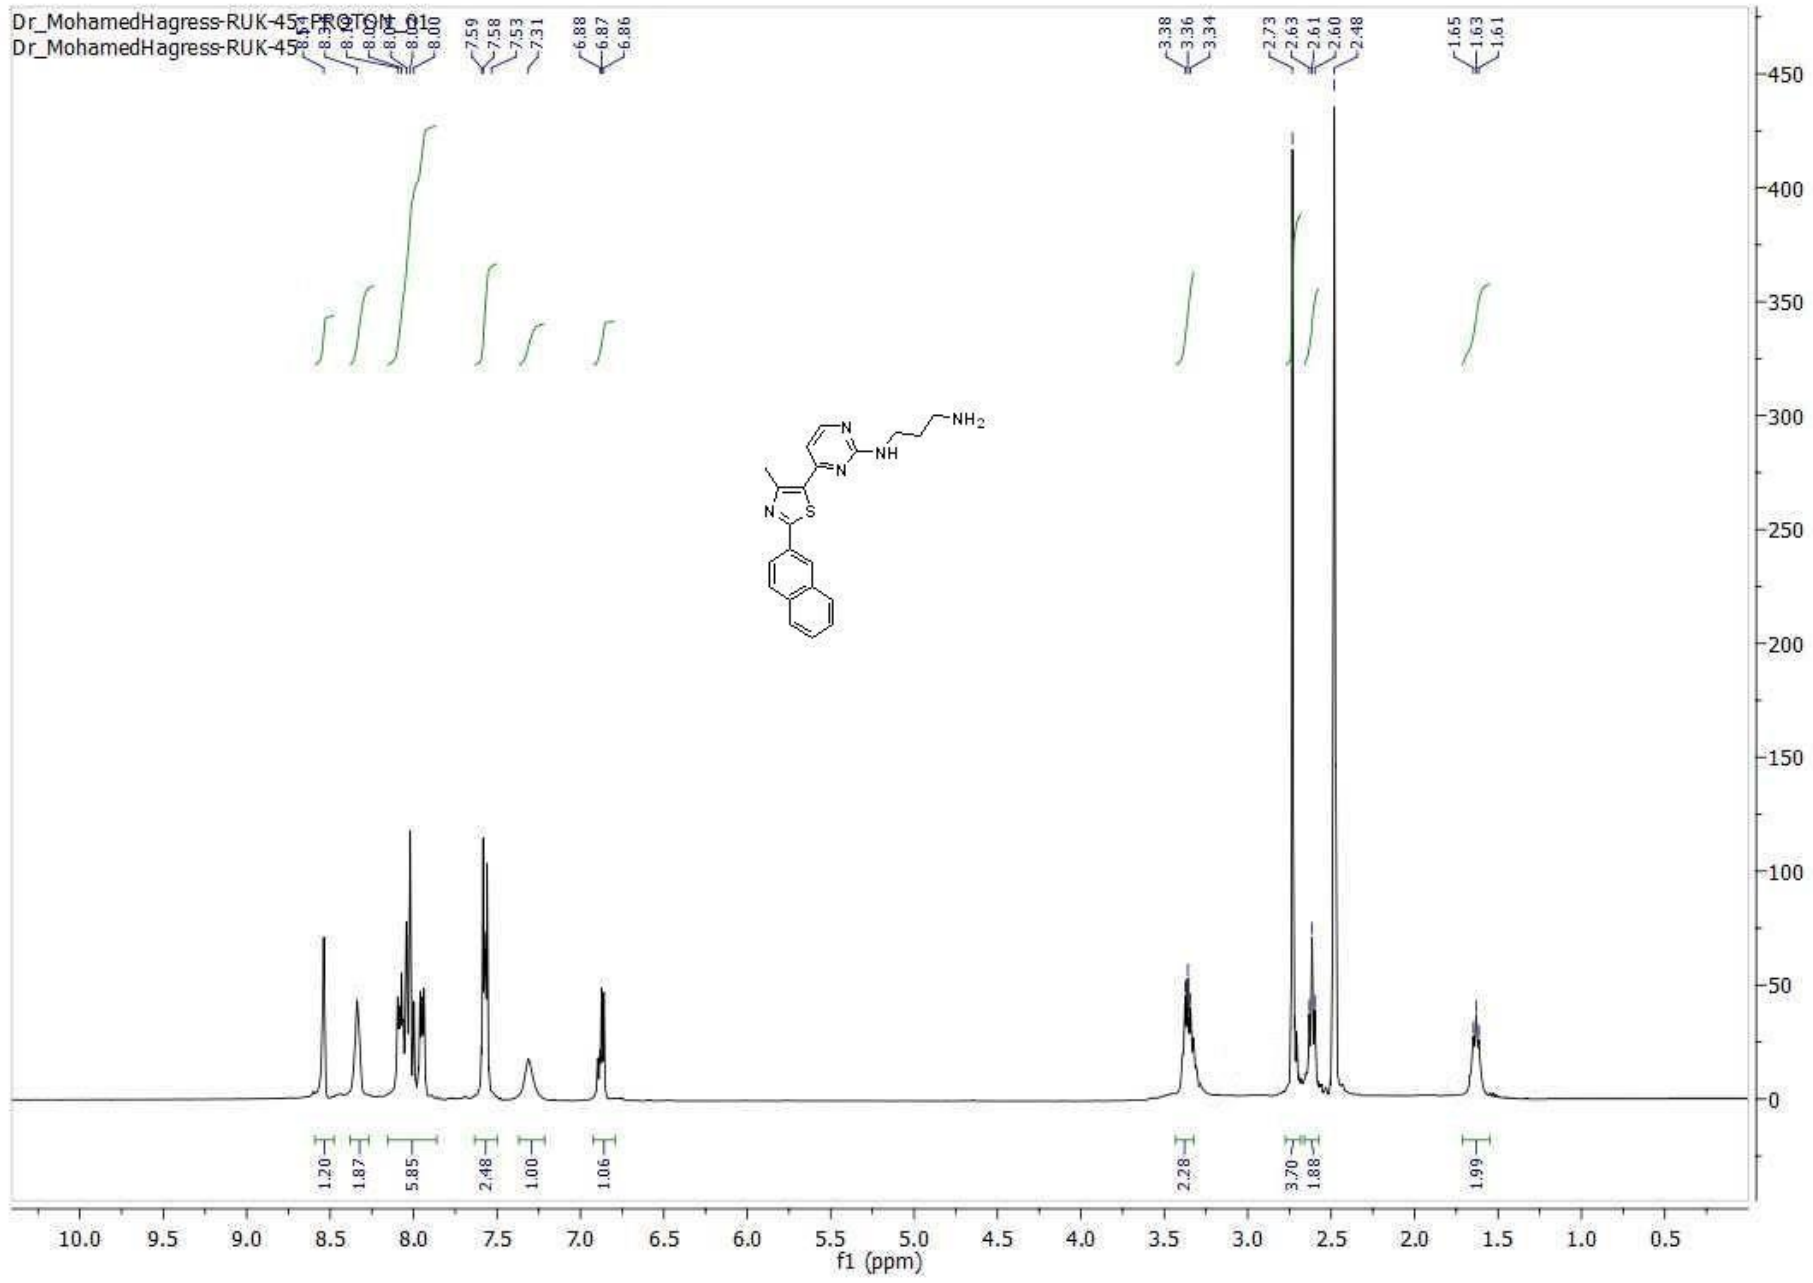

Dr\_MohamedHagress-RUK-45\_CARBON\_01  
Dr\_MohamedHagress-RUK-45

166.51  
162.56  
161.51  
159.49  
153.59  
134.24  
133.28  
132.31  
130.58  
129.35  
129.19  
128.19  
127.90  
127.49  
126.14  
123.84  
106.51

40.60  
40.39  
40.18  
39.97  
39.76  
39.55  
39.34  
38.99  
38.84  
35.53  
33.13  
29.41  
18.66

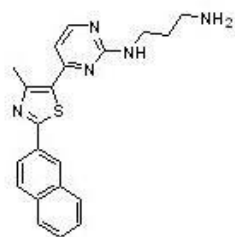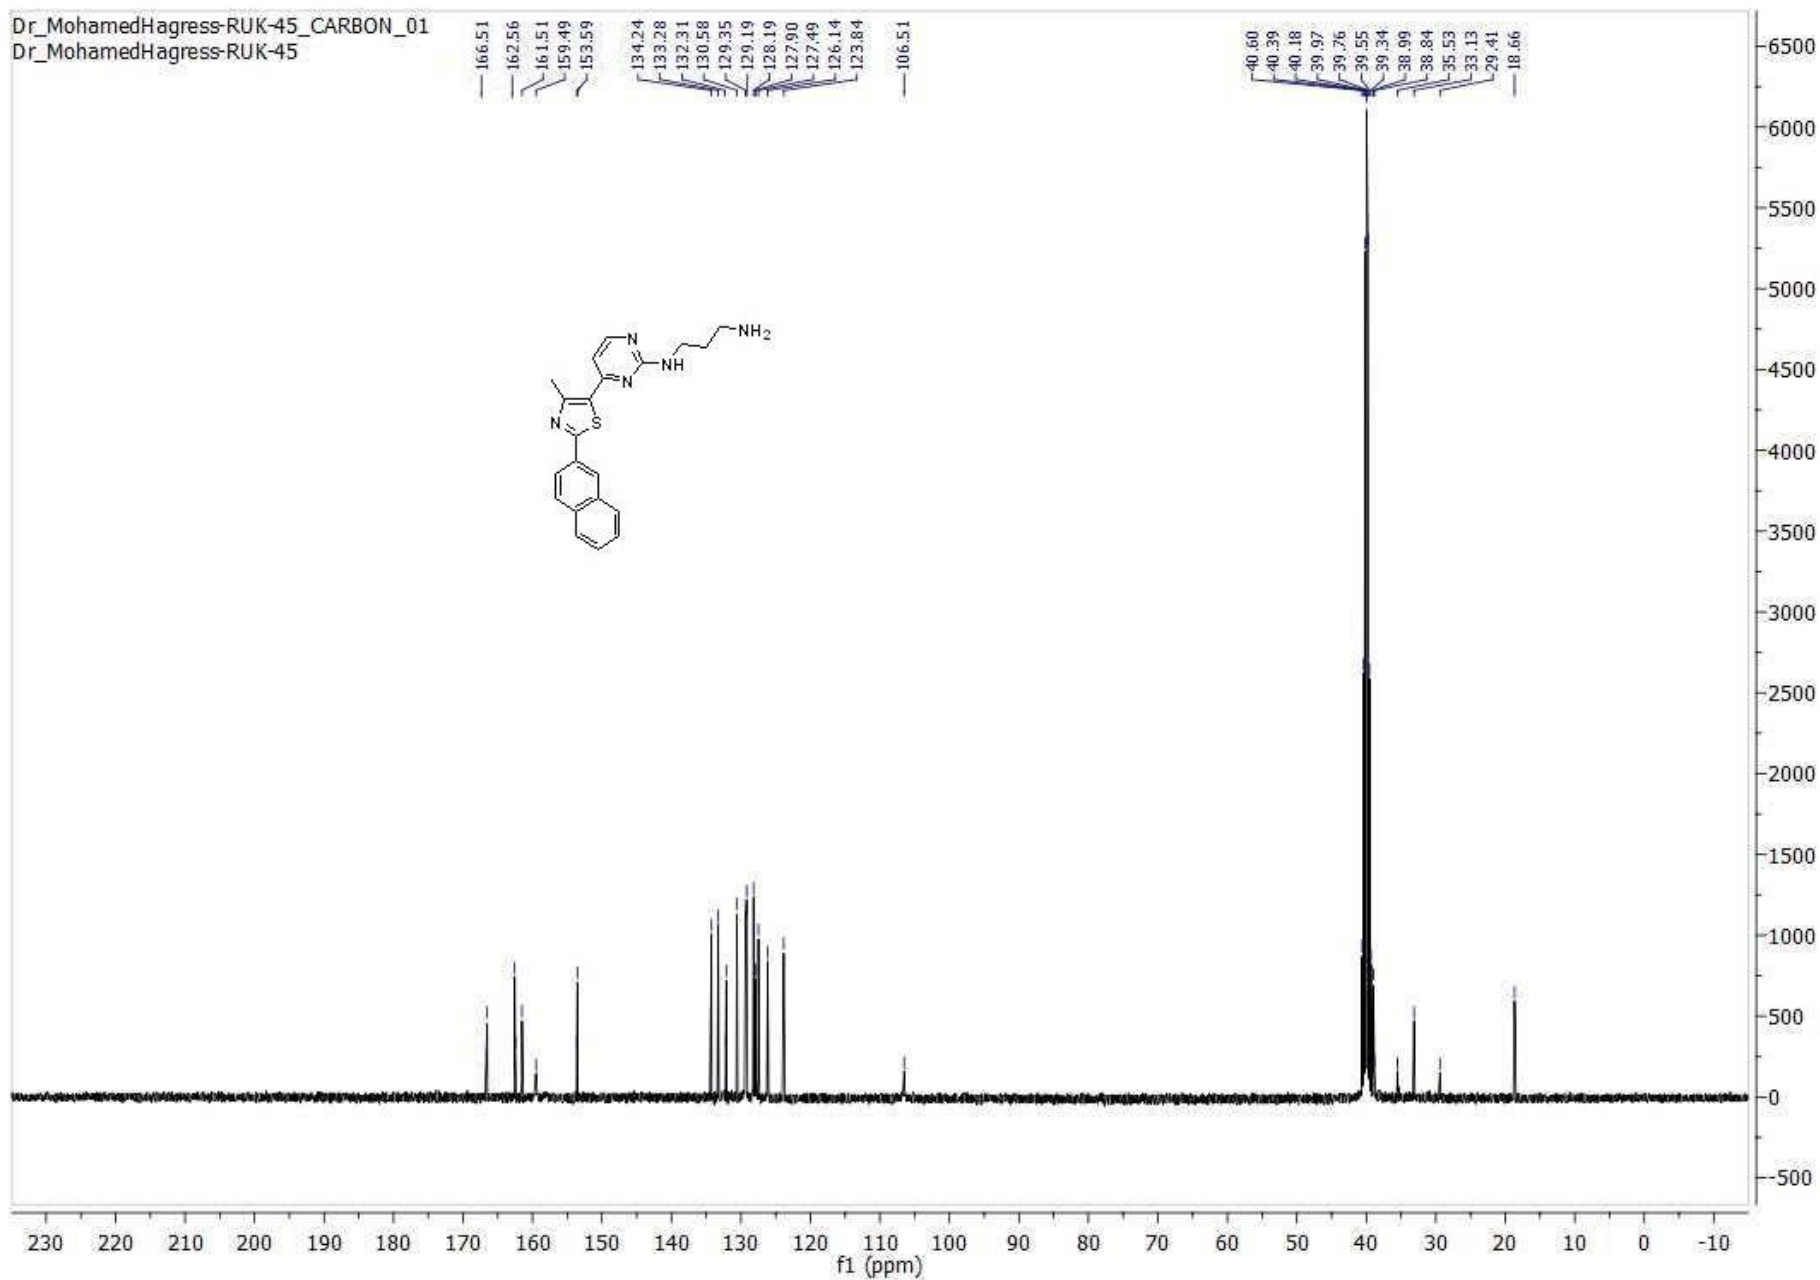

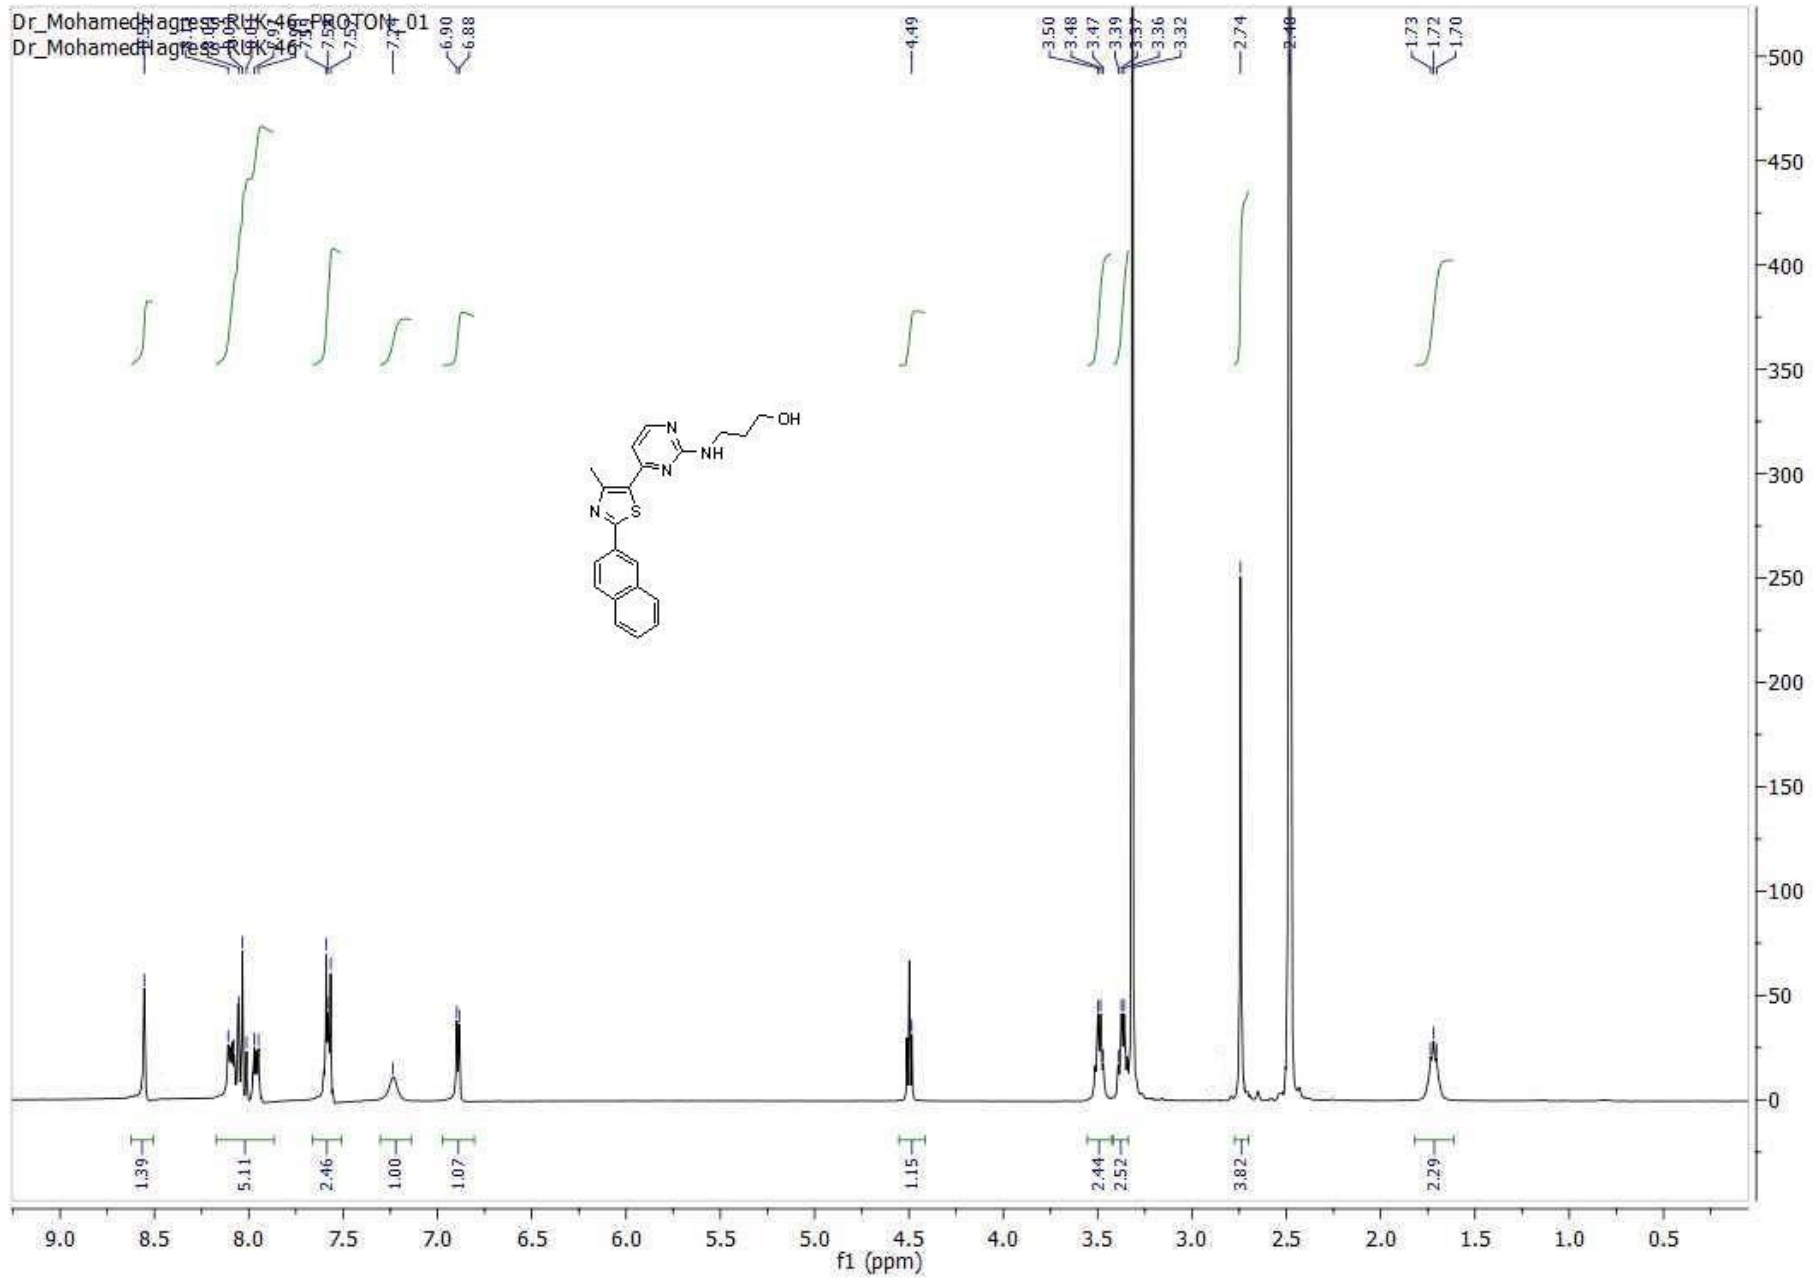



Dr\_MohamedHagress-RUK-46\_CARBON\_01  
Dr\_MohamedHagress-RUK-46

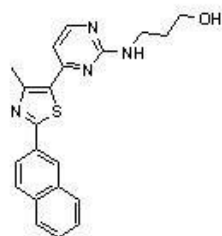

166.54  
162.54  
159.71  
157.27  
153.57  
134.25  
133.29  
132.31  
130.58  
129.38  
129.21  
128.20  
127.92  
127.51  
126.17  
123.85  
106.25

59.18  
40.59  
40.38  
40.18  
39.76  
39.55  
39.34  
38.52  
32.58  
18.67

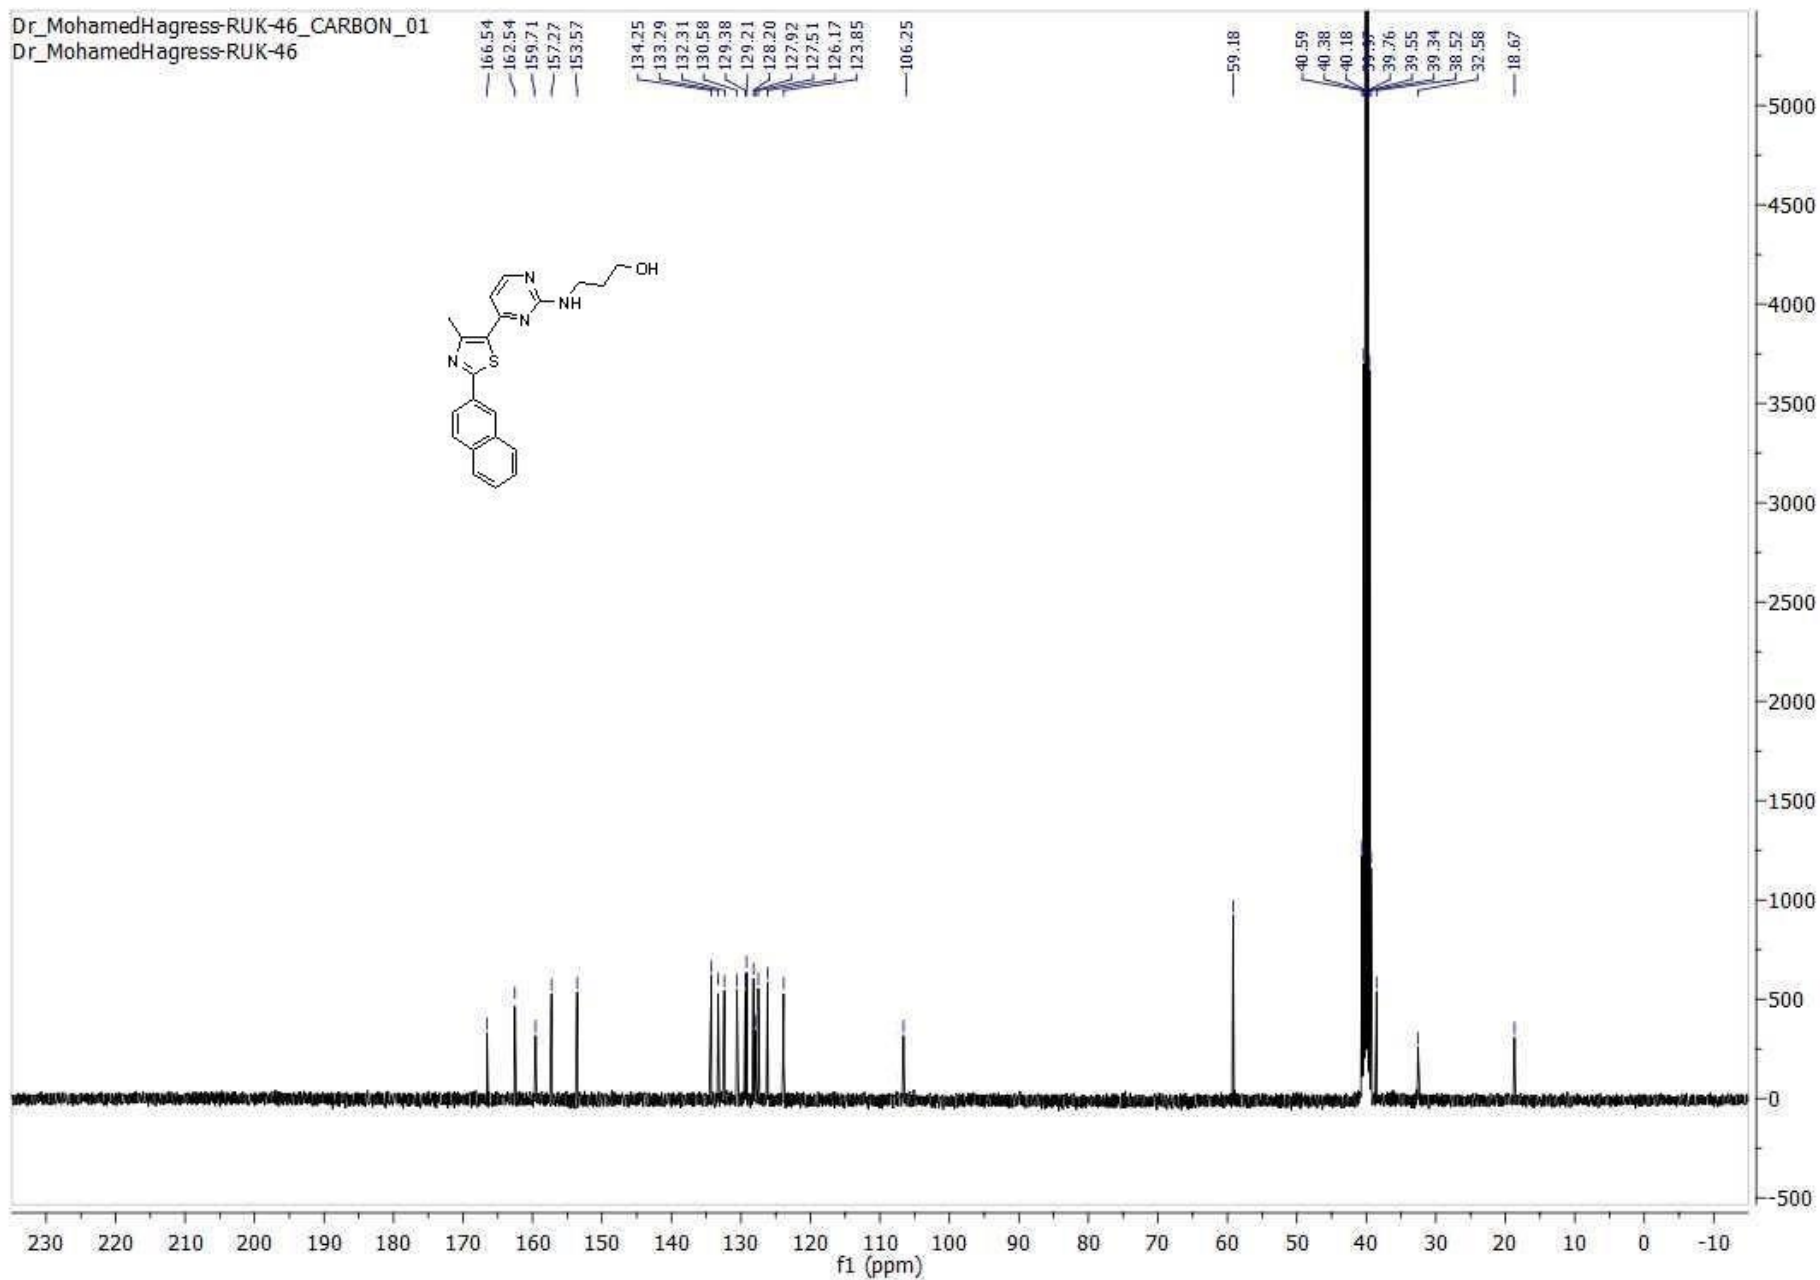

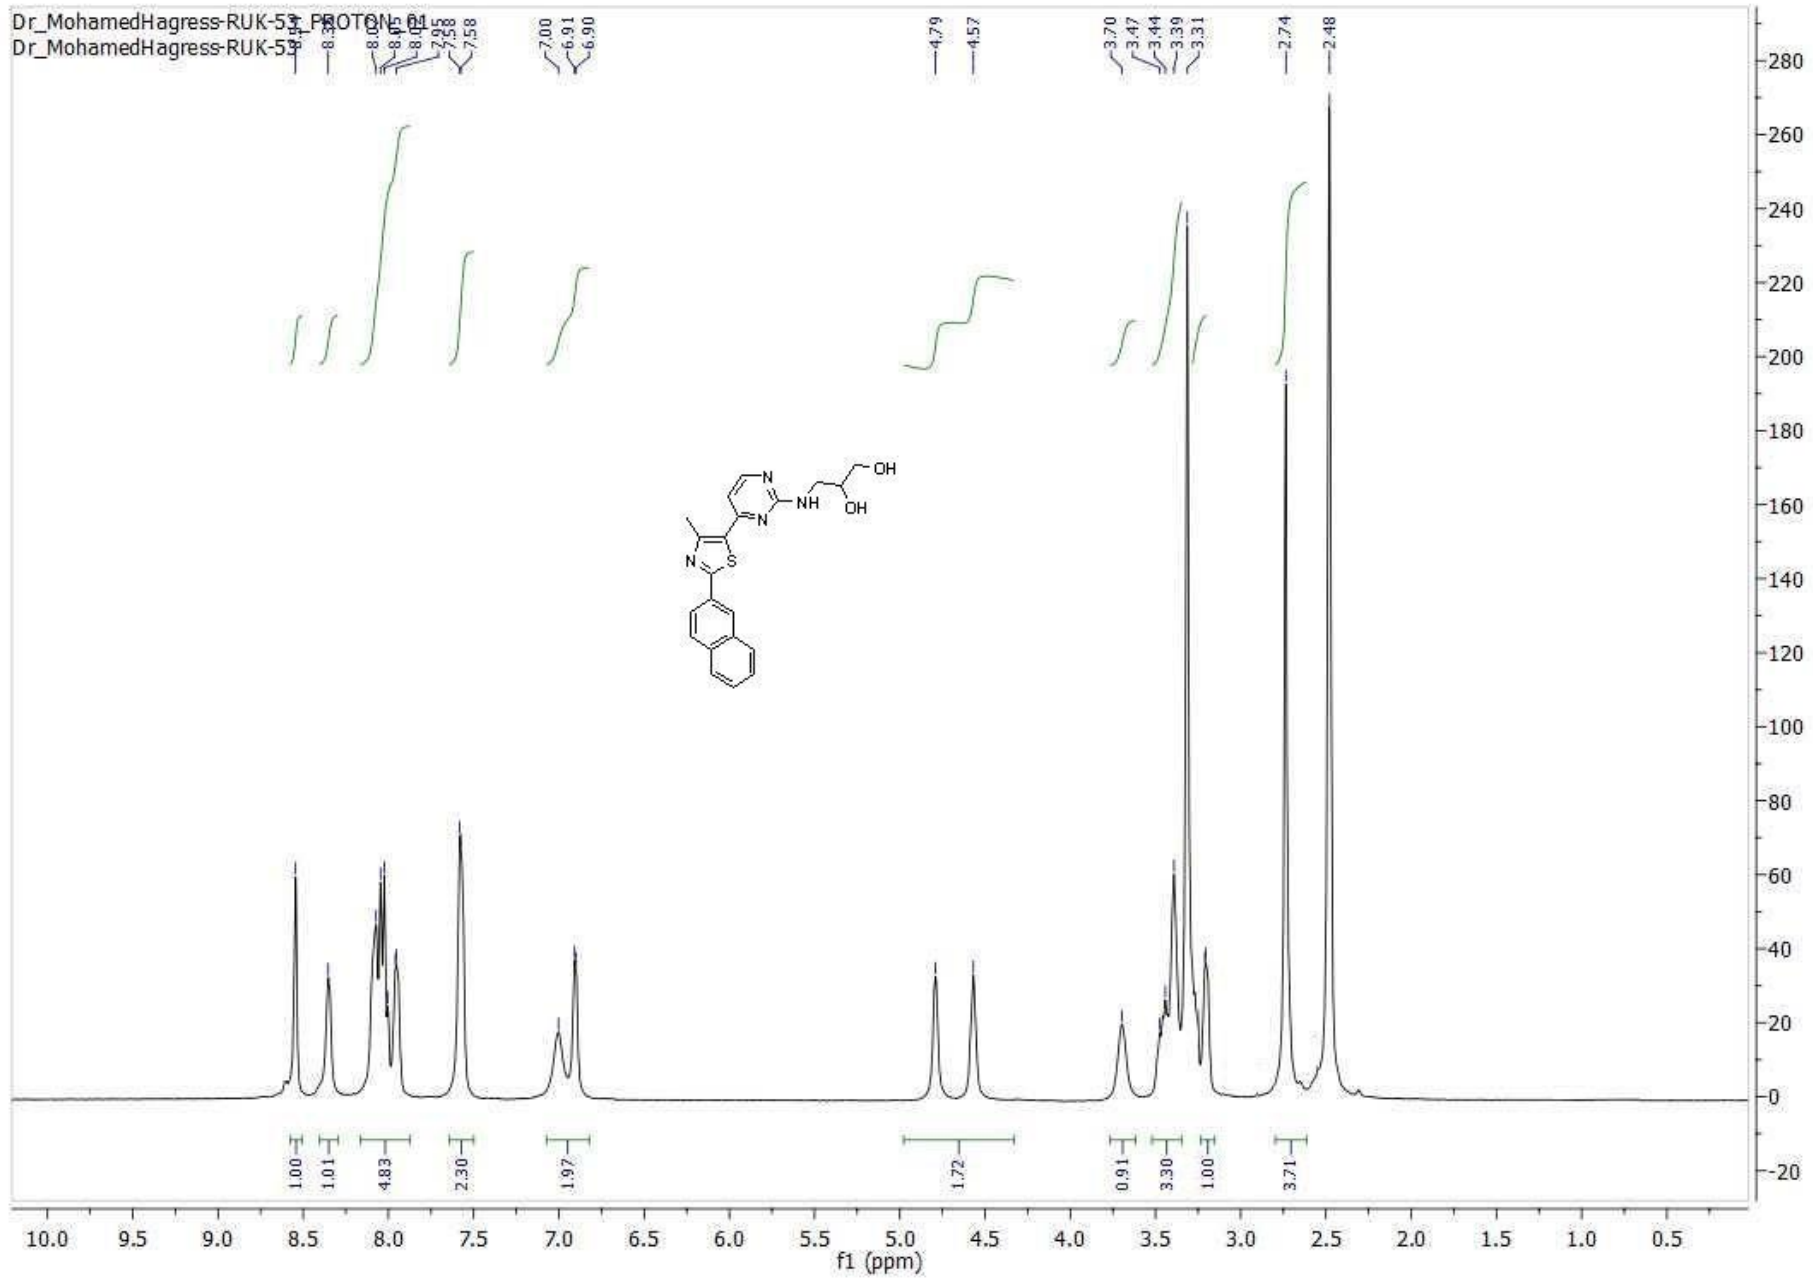

Dr\_MohamedHagress-RUK-53\_CARBON\_01  
Dr\_MohamedHagress-RUK-53

166.61  
162.60  
159.00  
157.28  
153.68  
134.25  
133.28  
130.56  
129.36  
129.19  
128.20  
127.92  
127.63  
127.51  
126.17  
123.84  
106.84

70.68  
64.55  
44.82  
40.59  
40.38  
40.17  
39.96  
39.76  
39.55  
39.34  
18.69

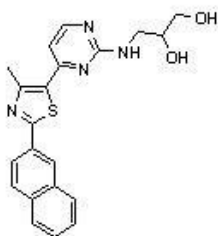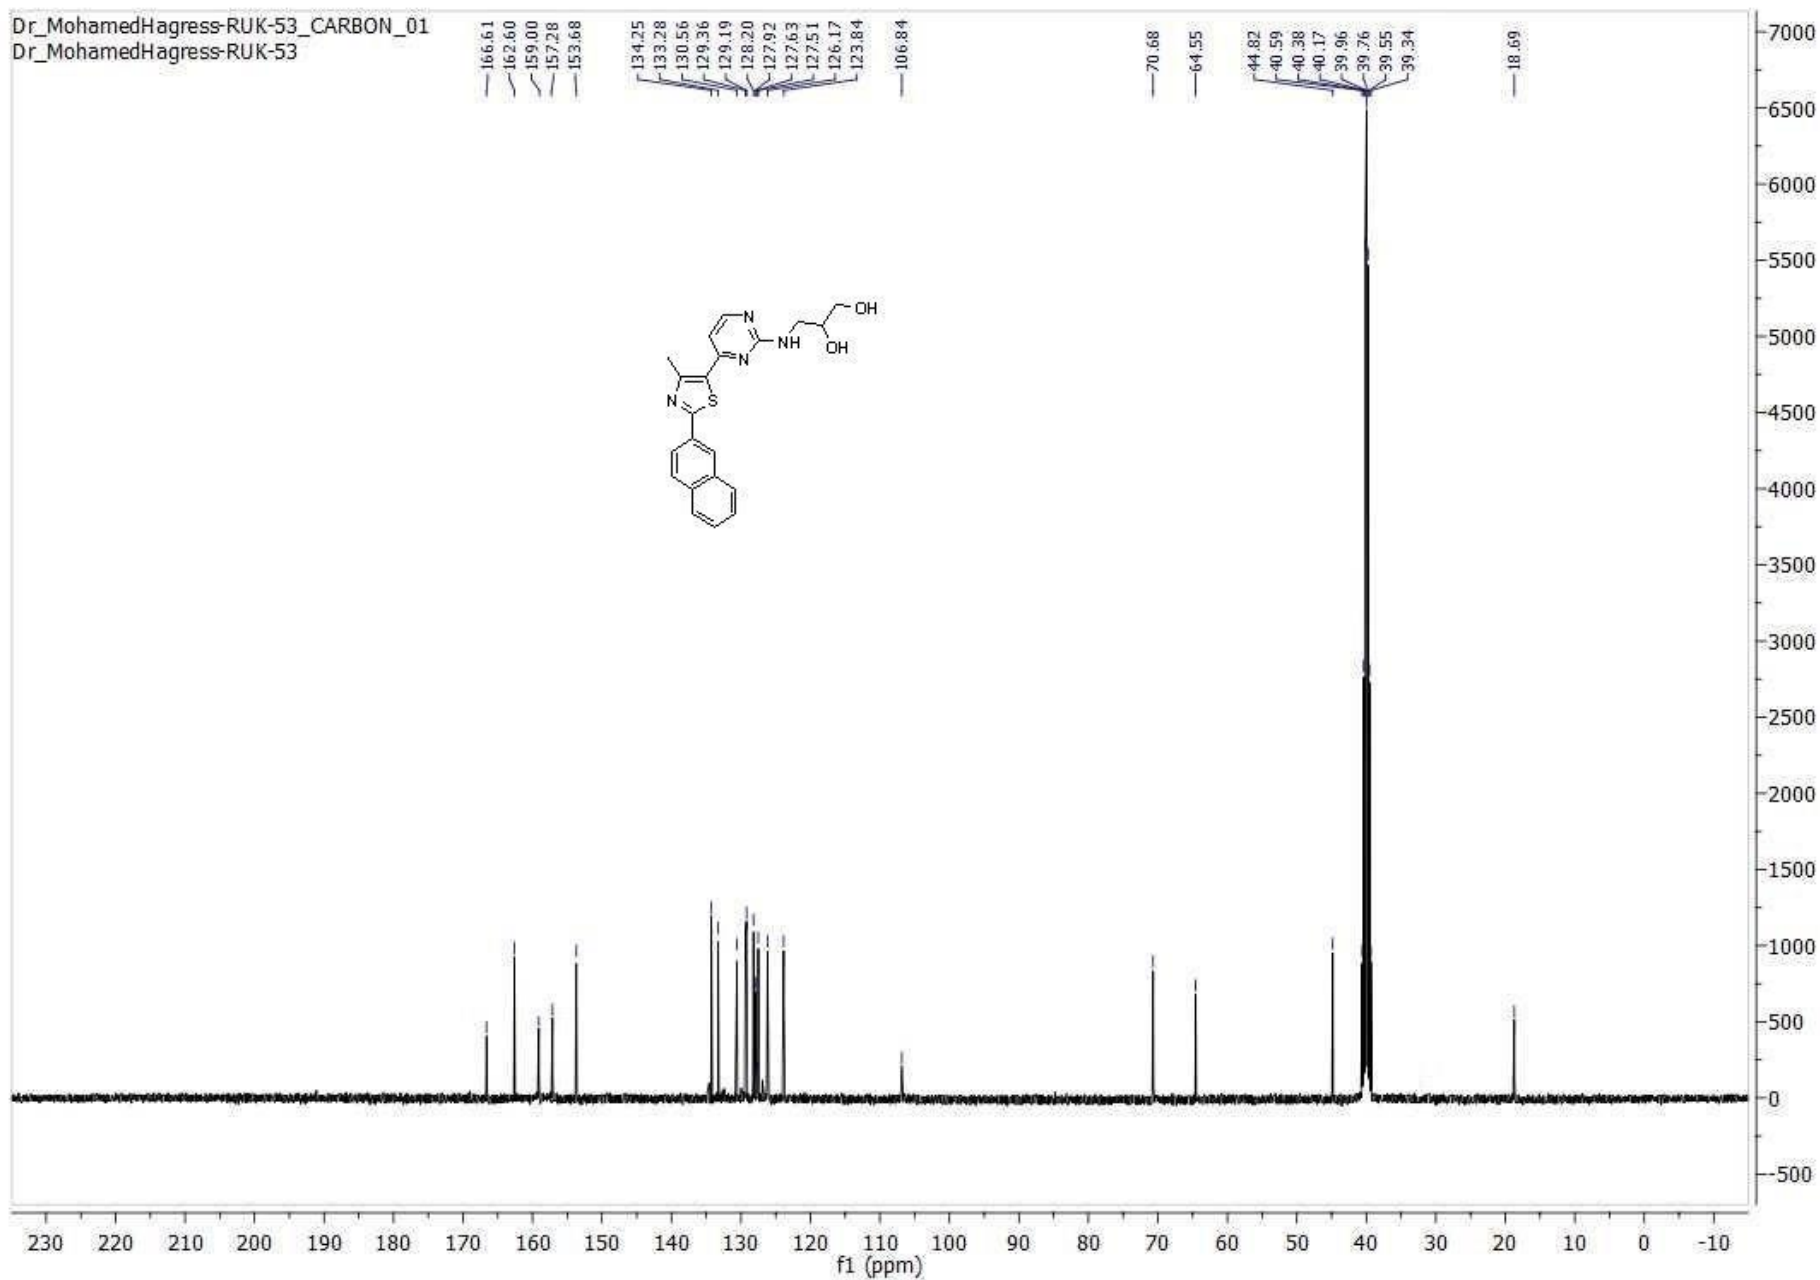

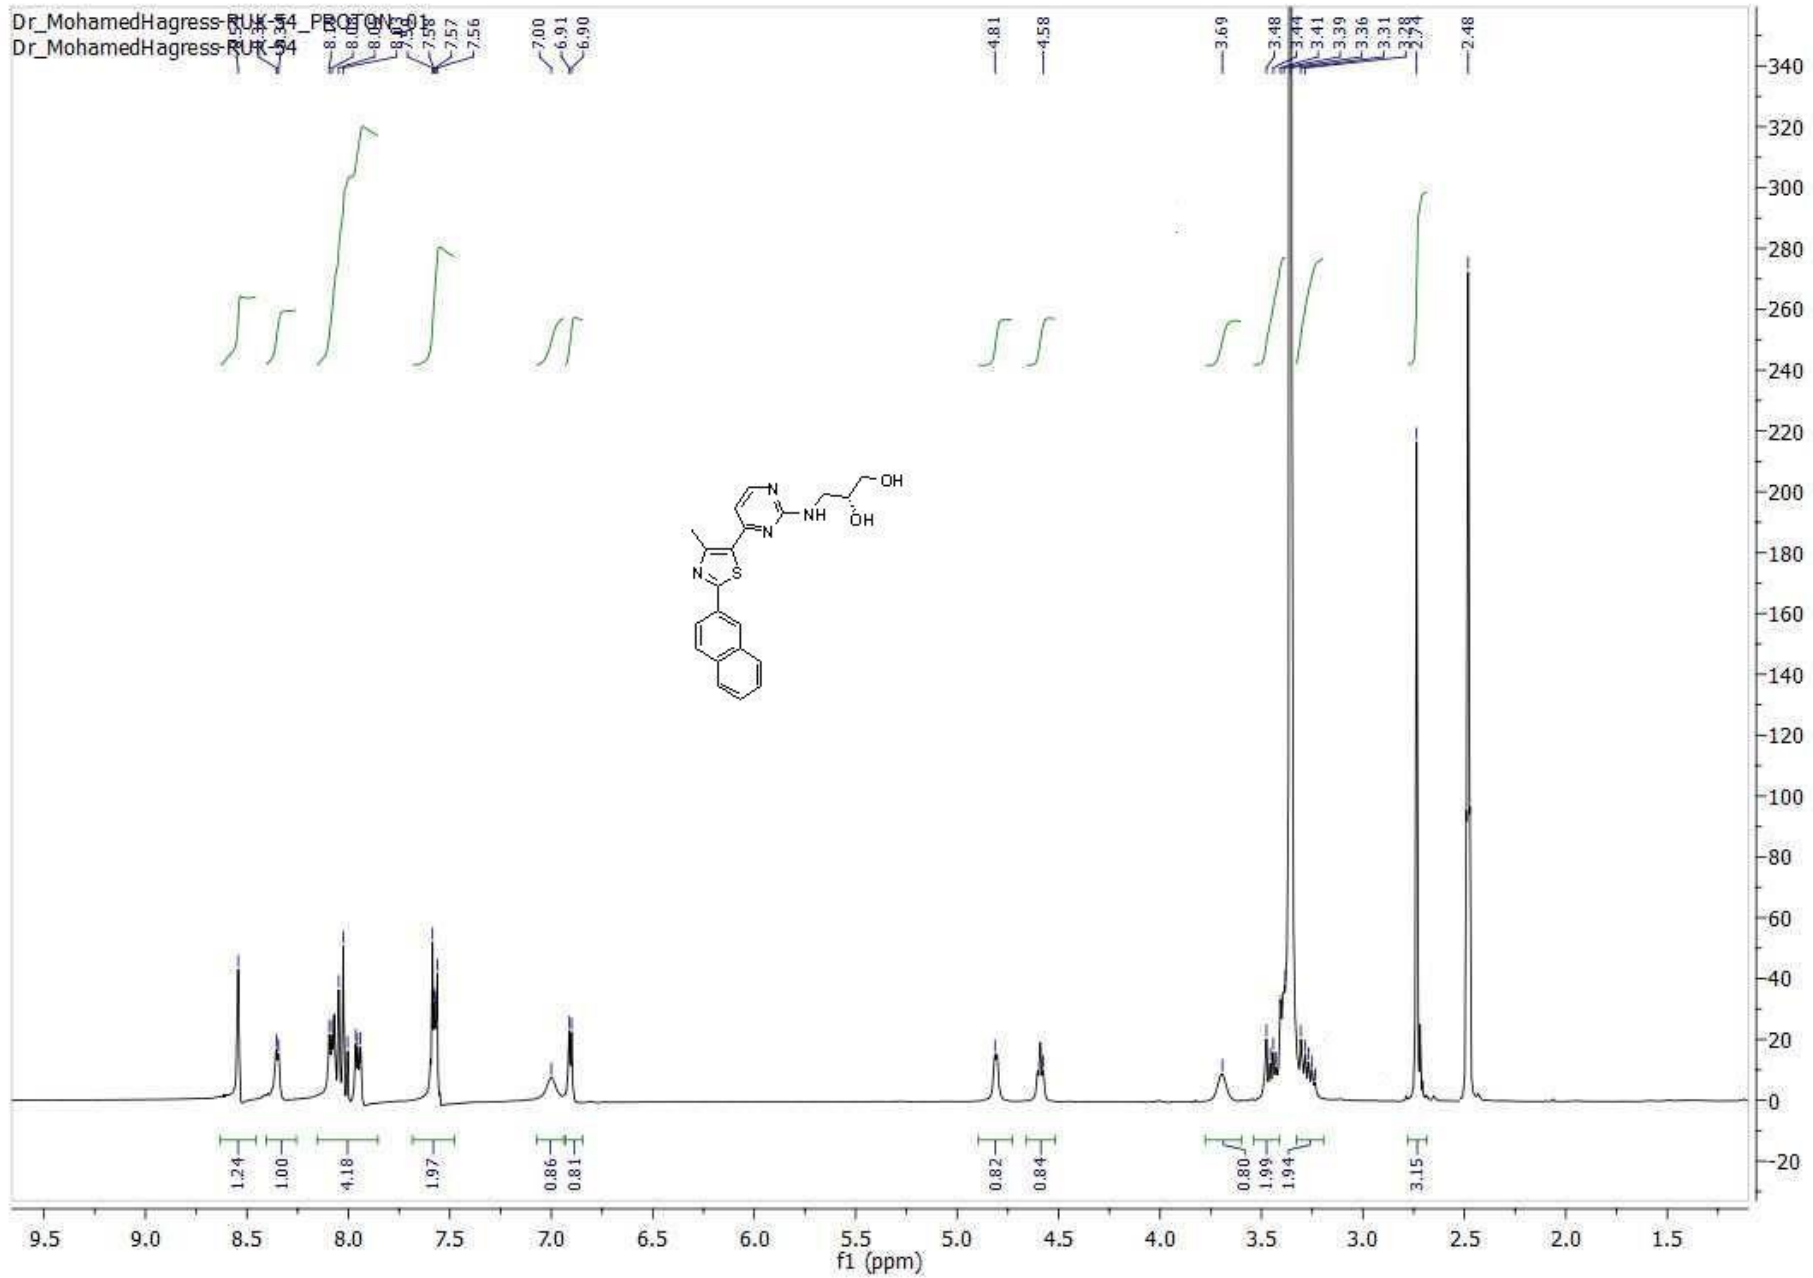



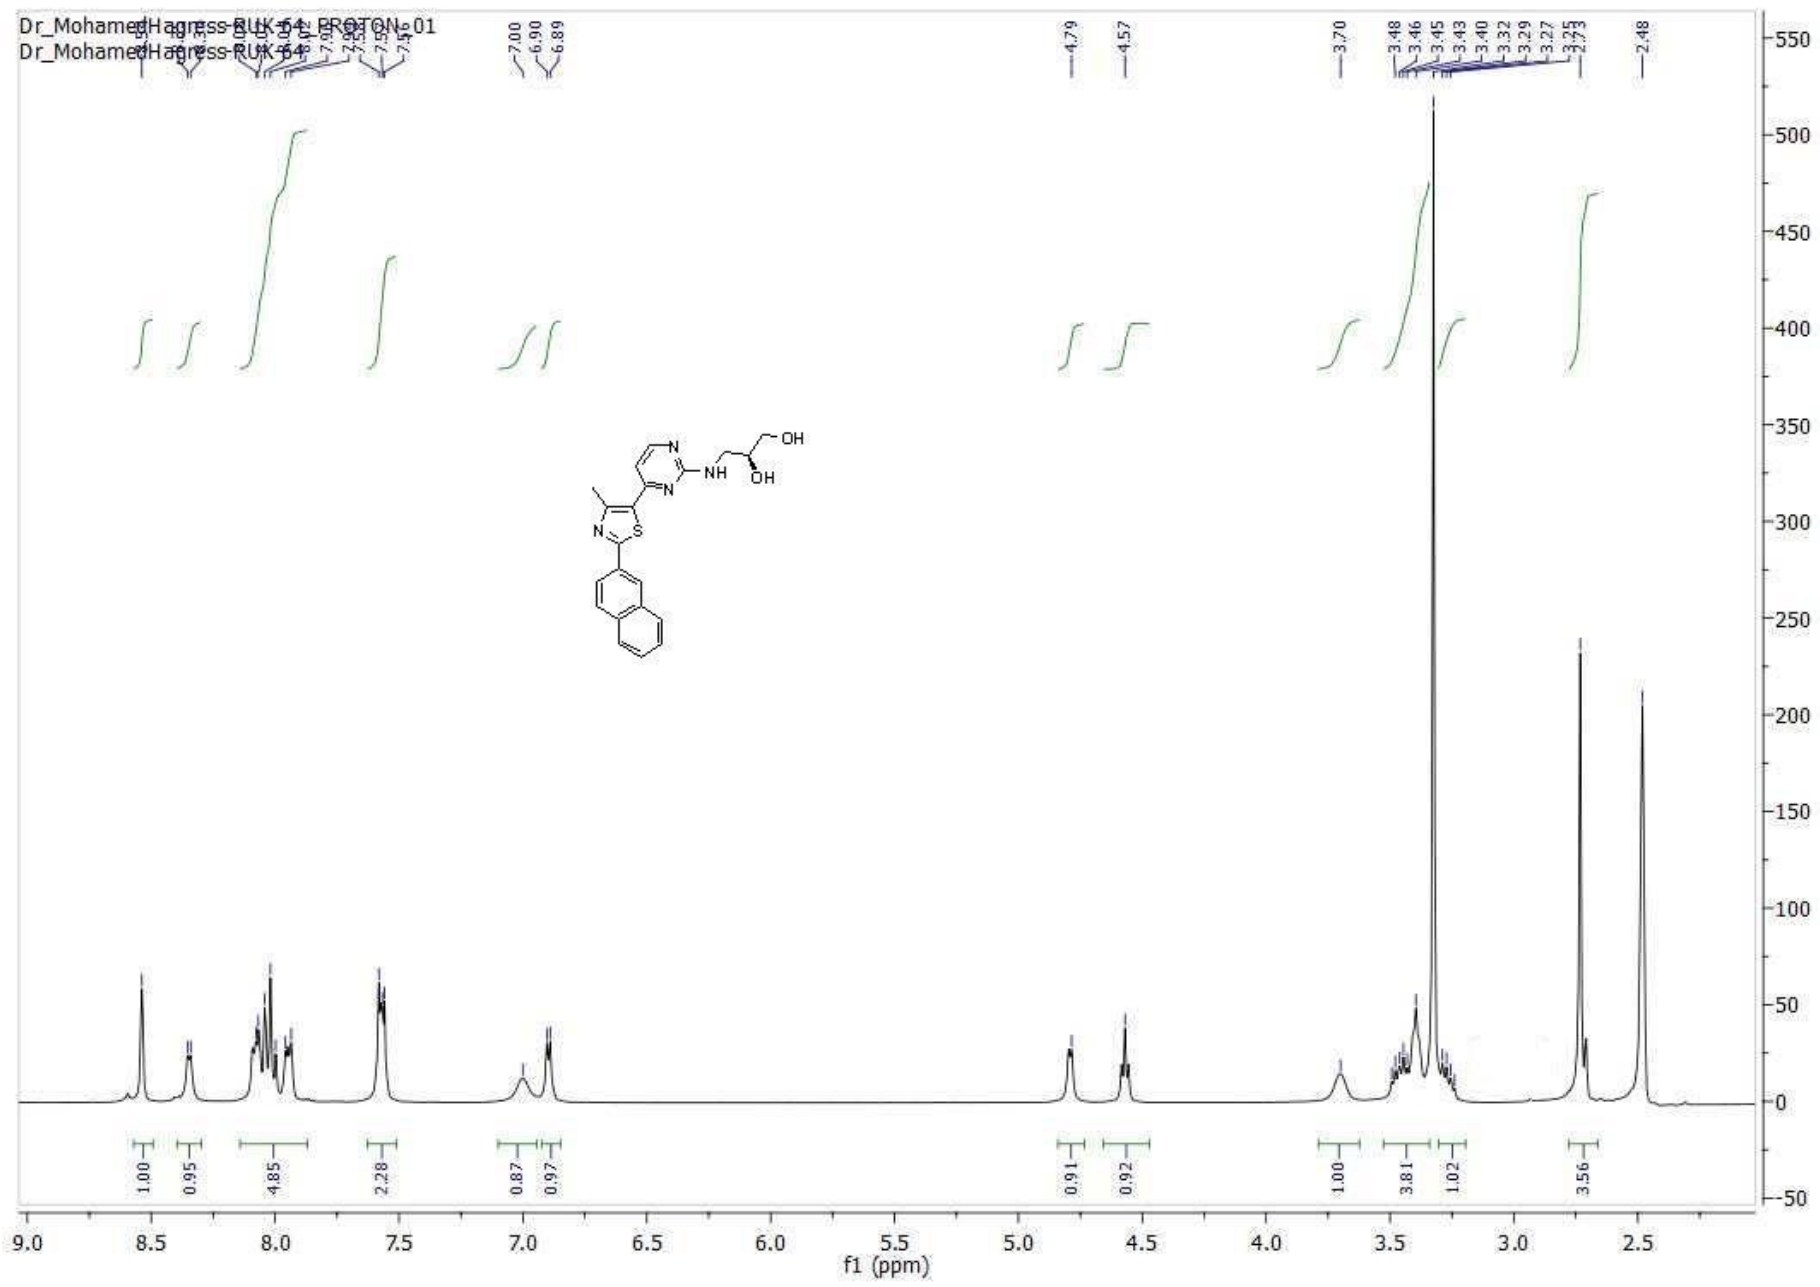

Dr\_MohamedHagress-RUK-64\_CARBON\_01  
Dr\_MohamedHagress-RUK-64

166.61  
162.60  
159.27  
157.27  
153.68  
134.25  
133.27  
130.56  
129.48  
129.35  
129.19  
128.19  
127.91  
127.50  
126.91  
123.84  
106.85

70.68  
64.55  
44.82  
40.58  
40.37  
40.16  
39.95  
39.75  
39.54  
39.33  
18.69

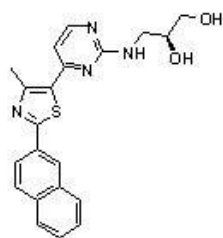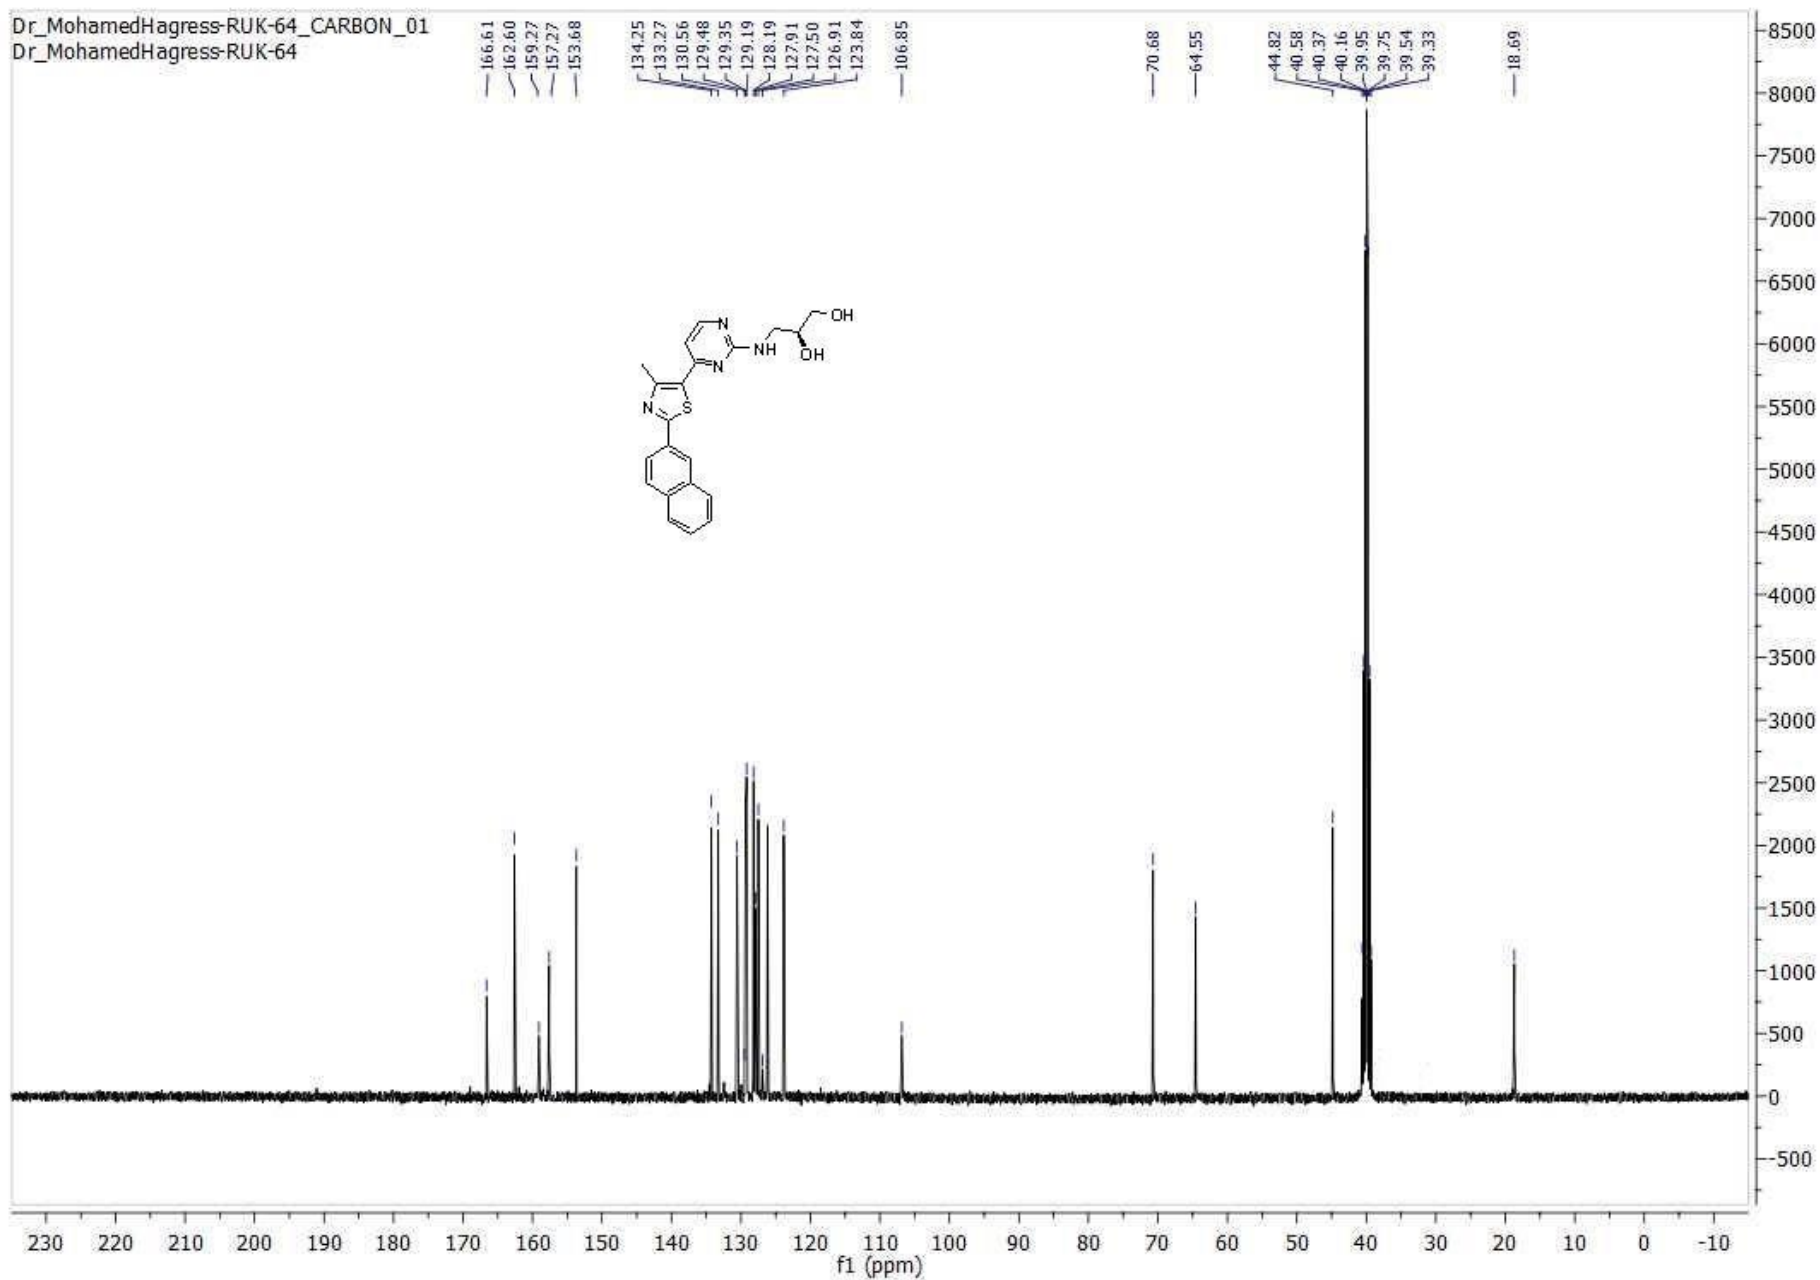

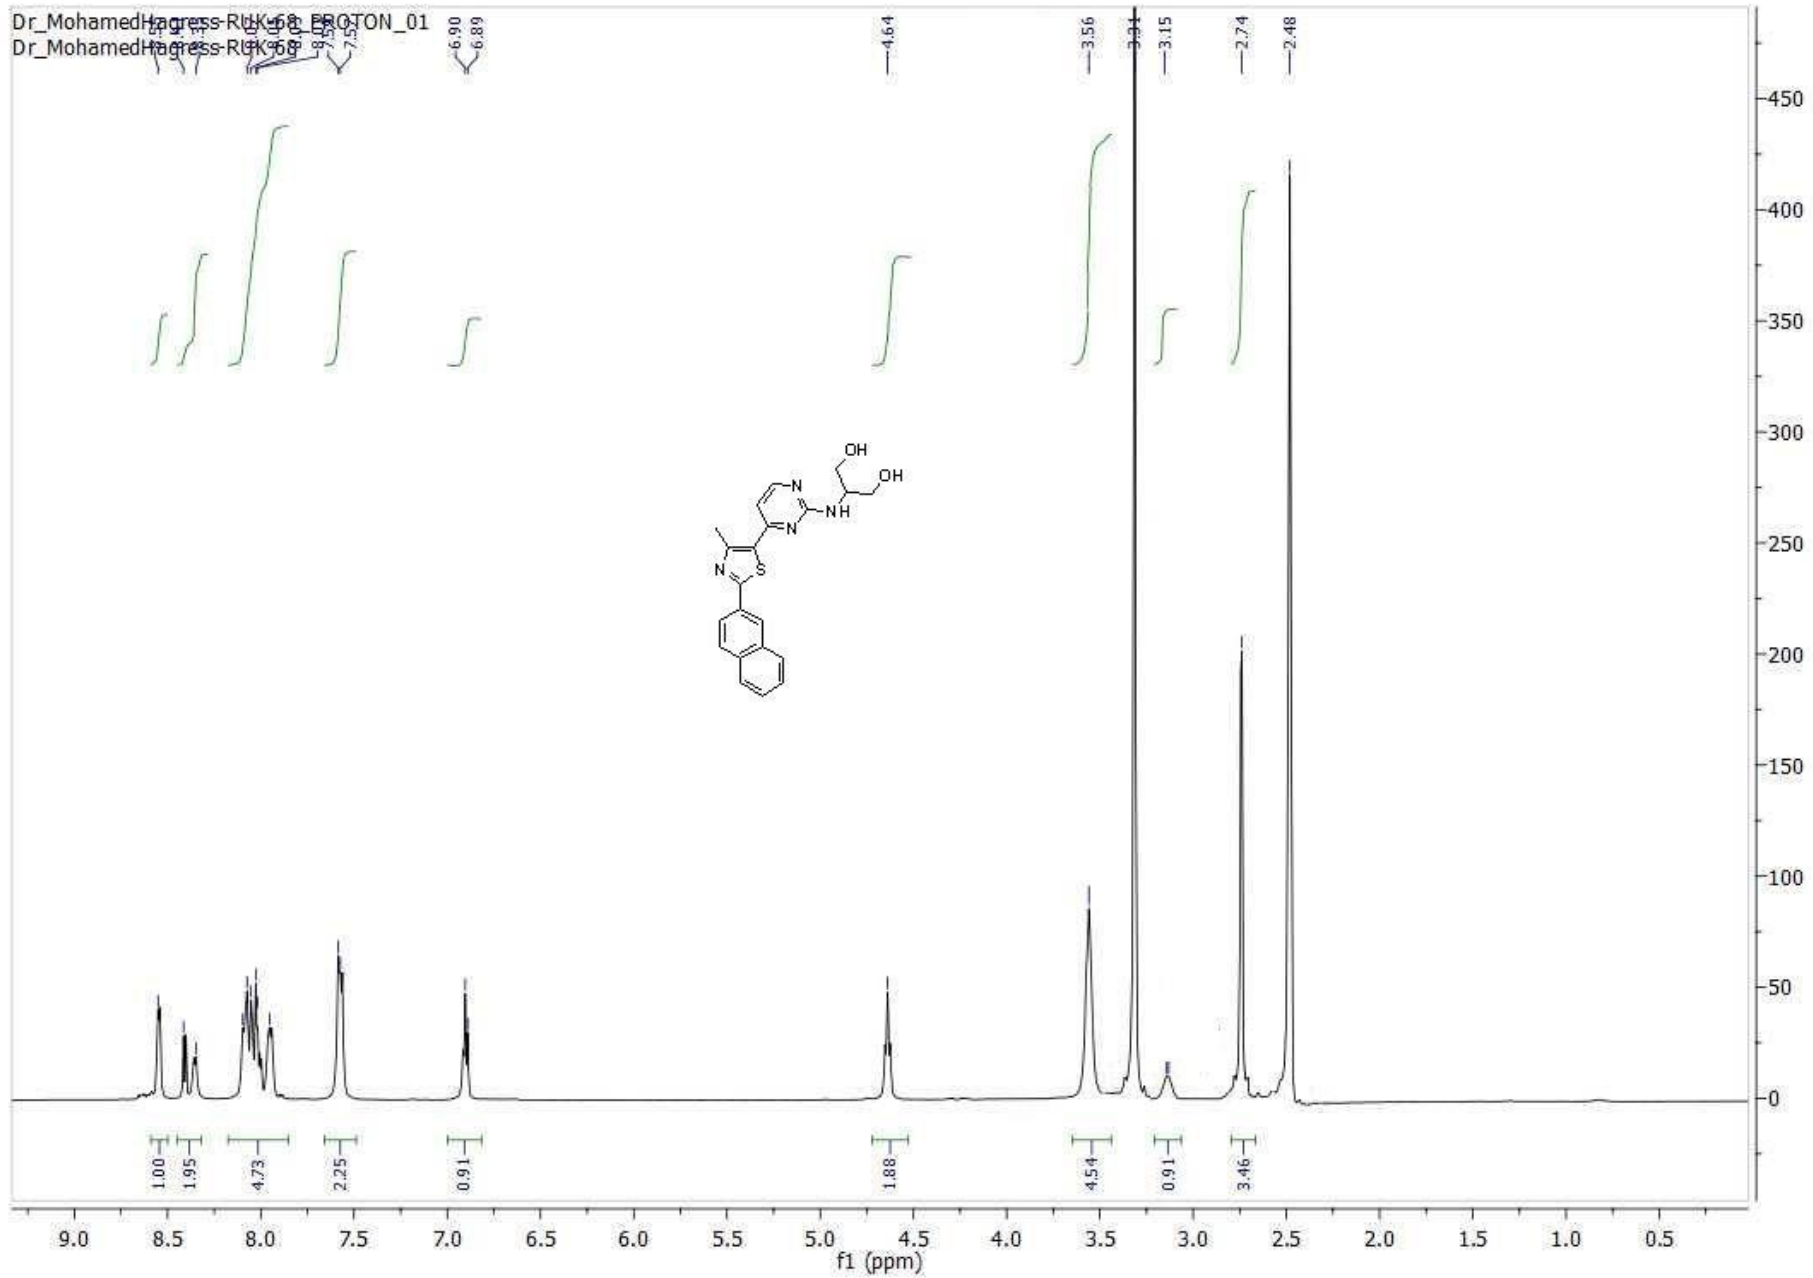



Dr\_MohamedHagress-RUK-68\_CARBON\_01  
Dr\_MohamedHagress-RUK-68

166.33  
162.15  
159.30  
157.83  
153.49  
134.25  
132.56  
130.57  
130.55  
129.37  
129.32  
129.19  
128.14  
127.11  
126.01  
123.82  
105.93

60.64  
55.00  
40.59  
40.38  
40.17  
39.96  
39.75  
39.55  
39.34  
18.74

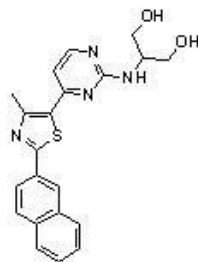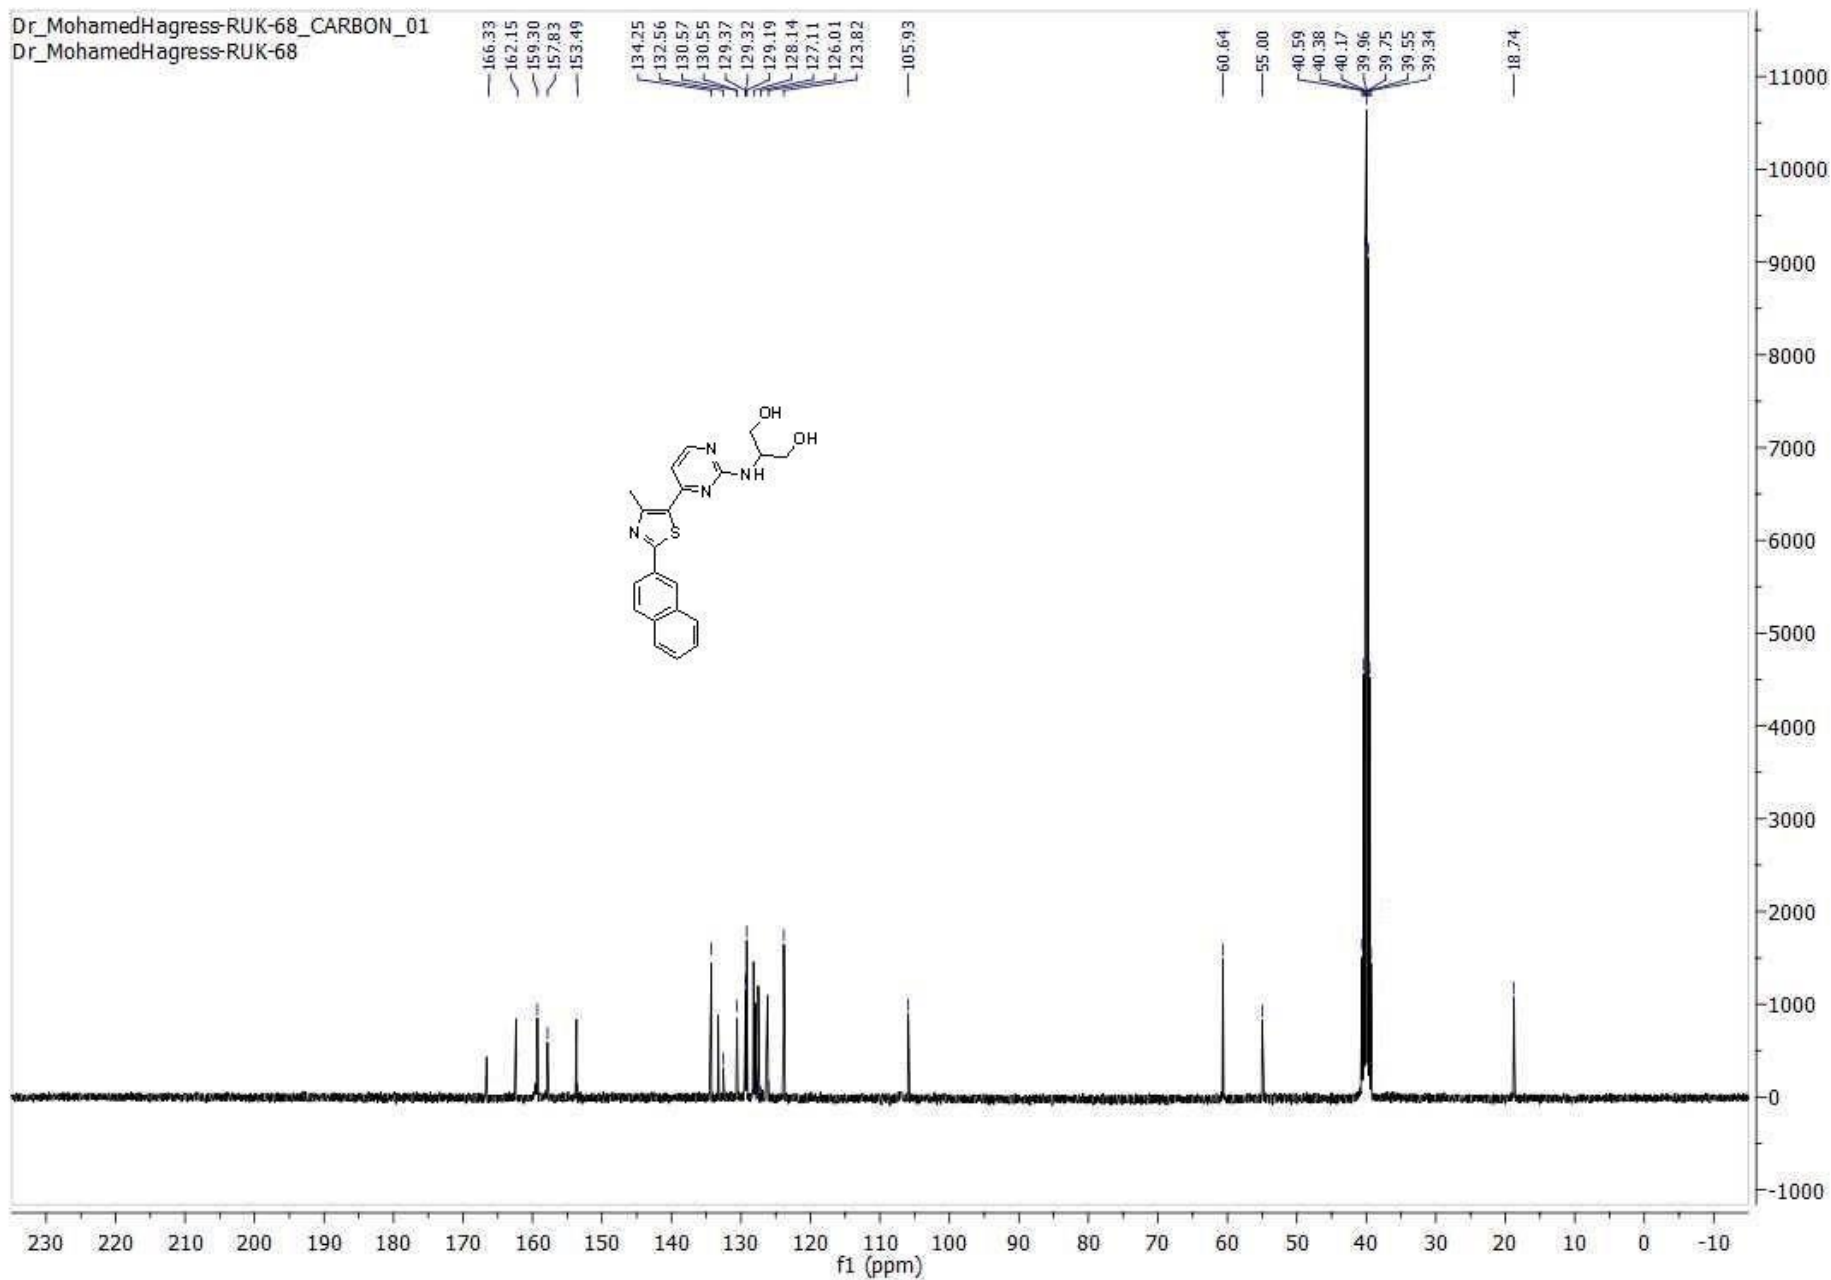

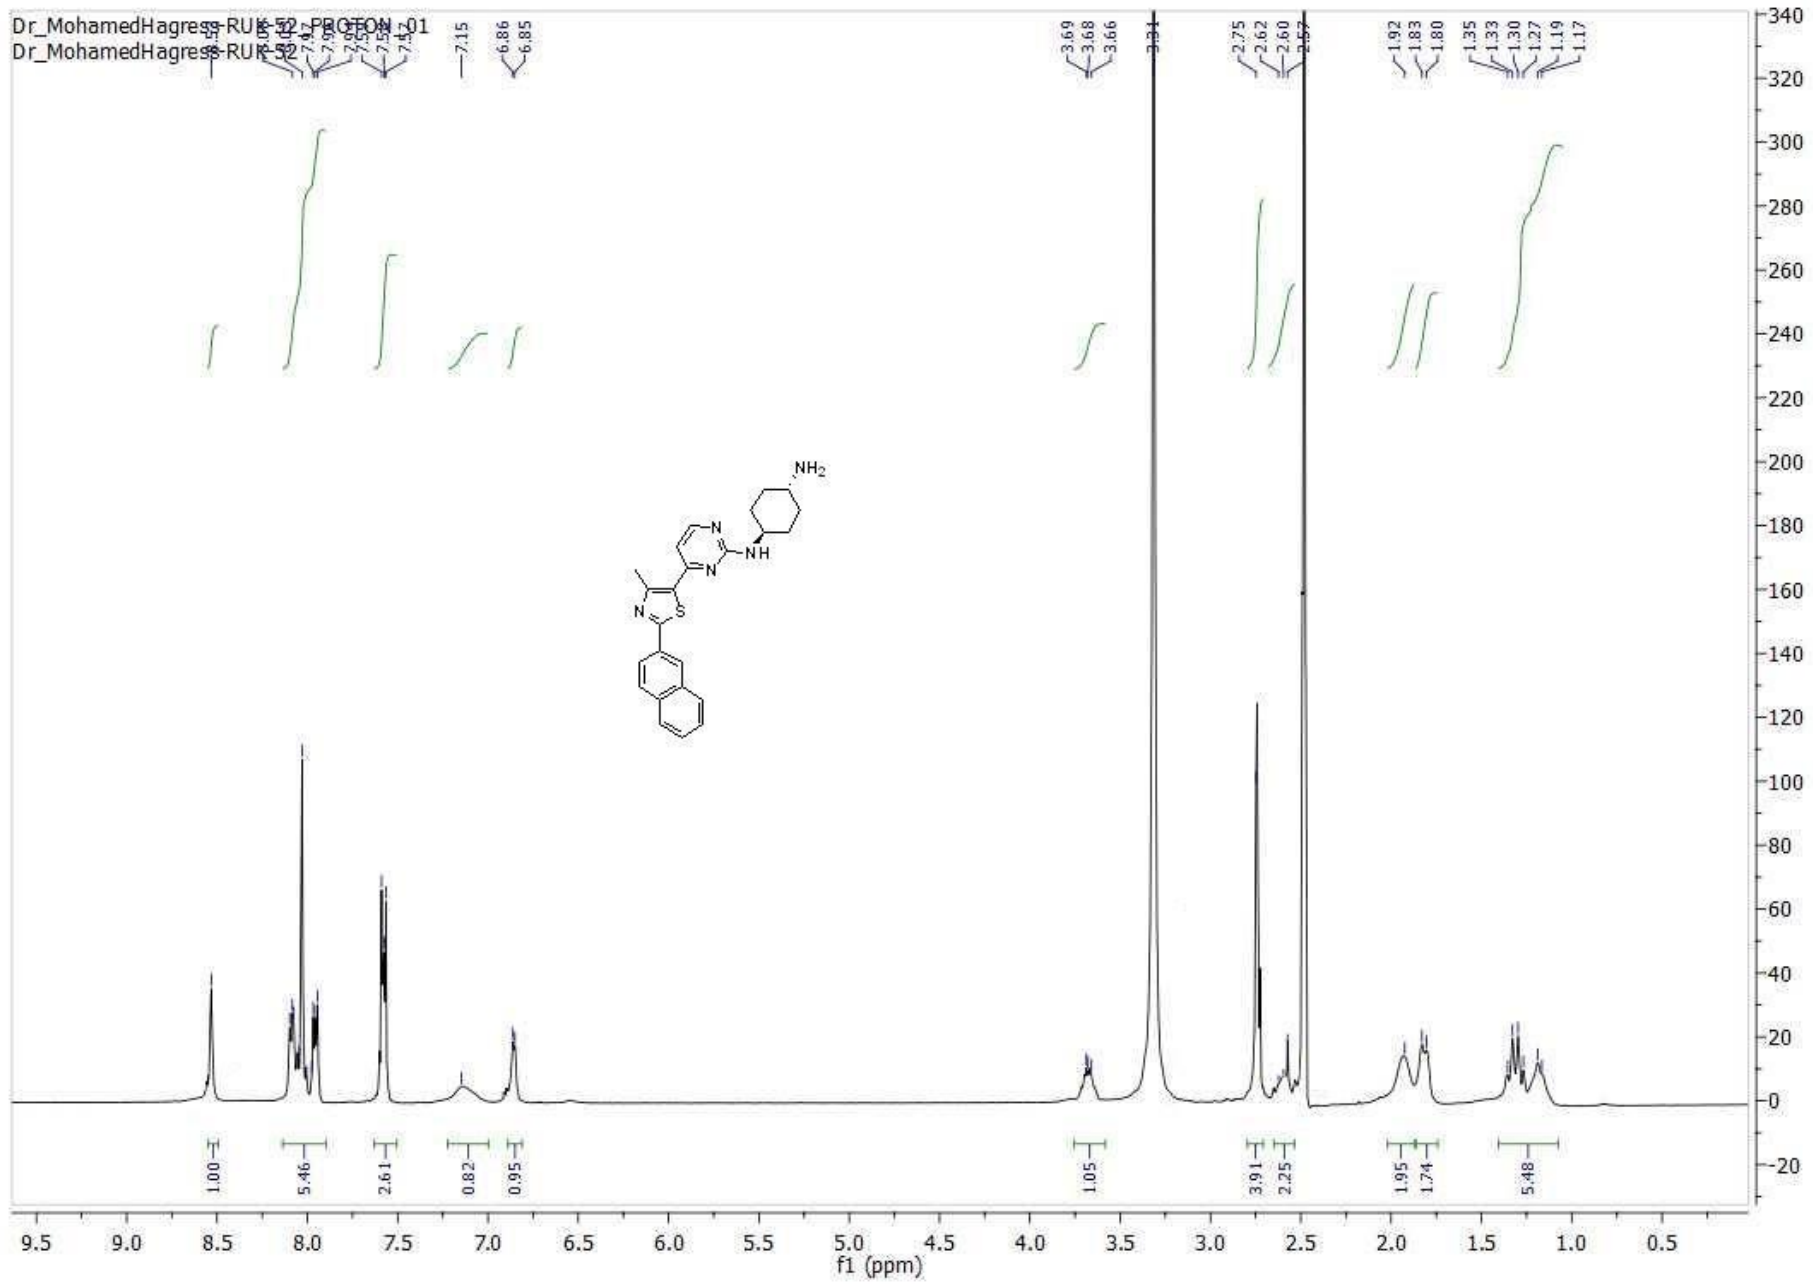

Dr\_MohamedHagress-RUK-52\_CARBON\_01  
Dr\_MohamedHagress-RUK-52

166.45  
161.90  
159.71  
158.30  
153.62  
134.05  
133.32  
132.63  
130.56  
129.46  
129.16  
128.14  
127.93  
127.52  
126.10  
123.86  
106.66

53.09  
50.18

34.79  
31.60

18.60

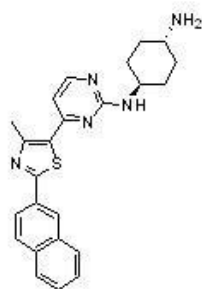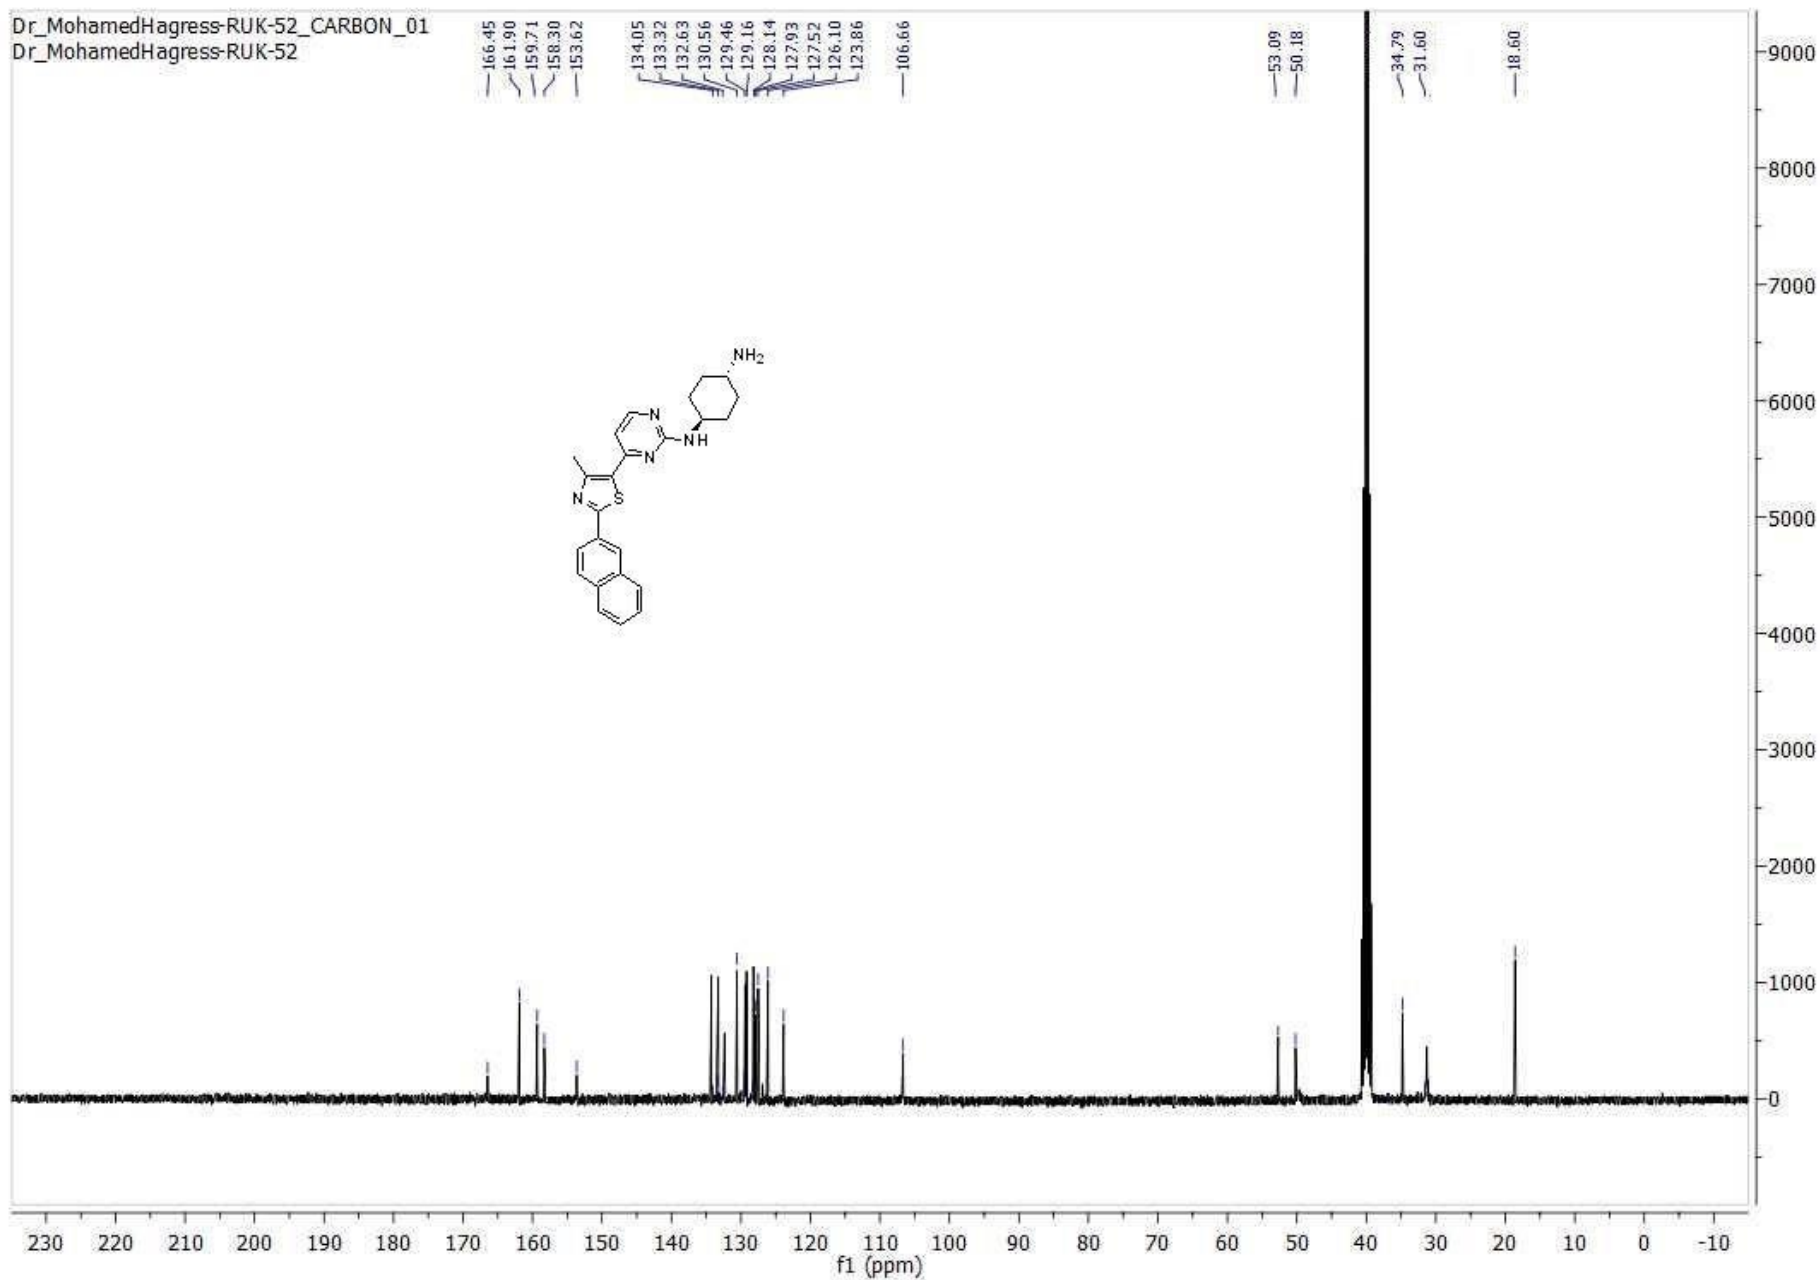

Dr\_MohamedHagress-RUK-47-PROTON\_01  
Dr\_MohamedHagress-RUK-47

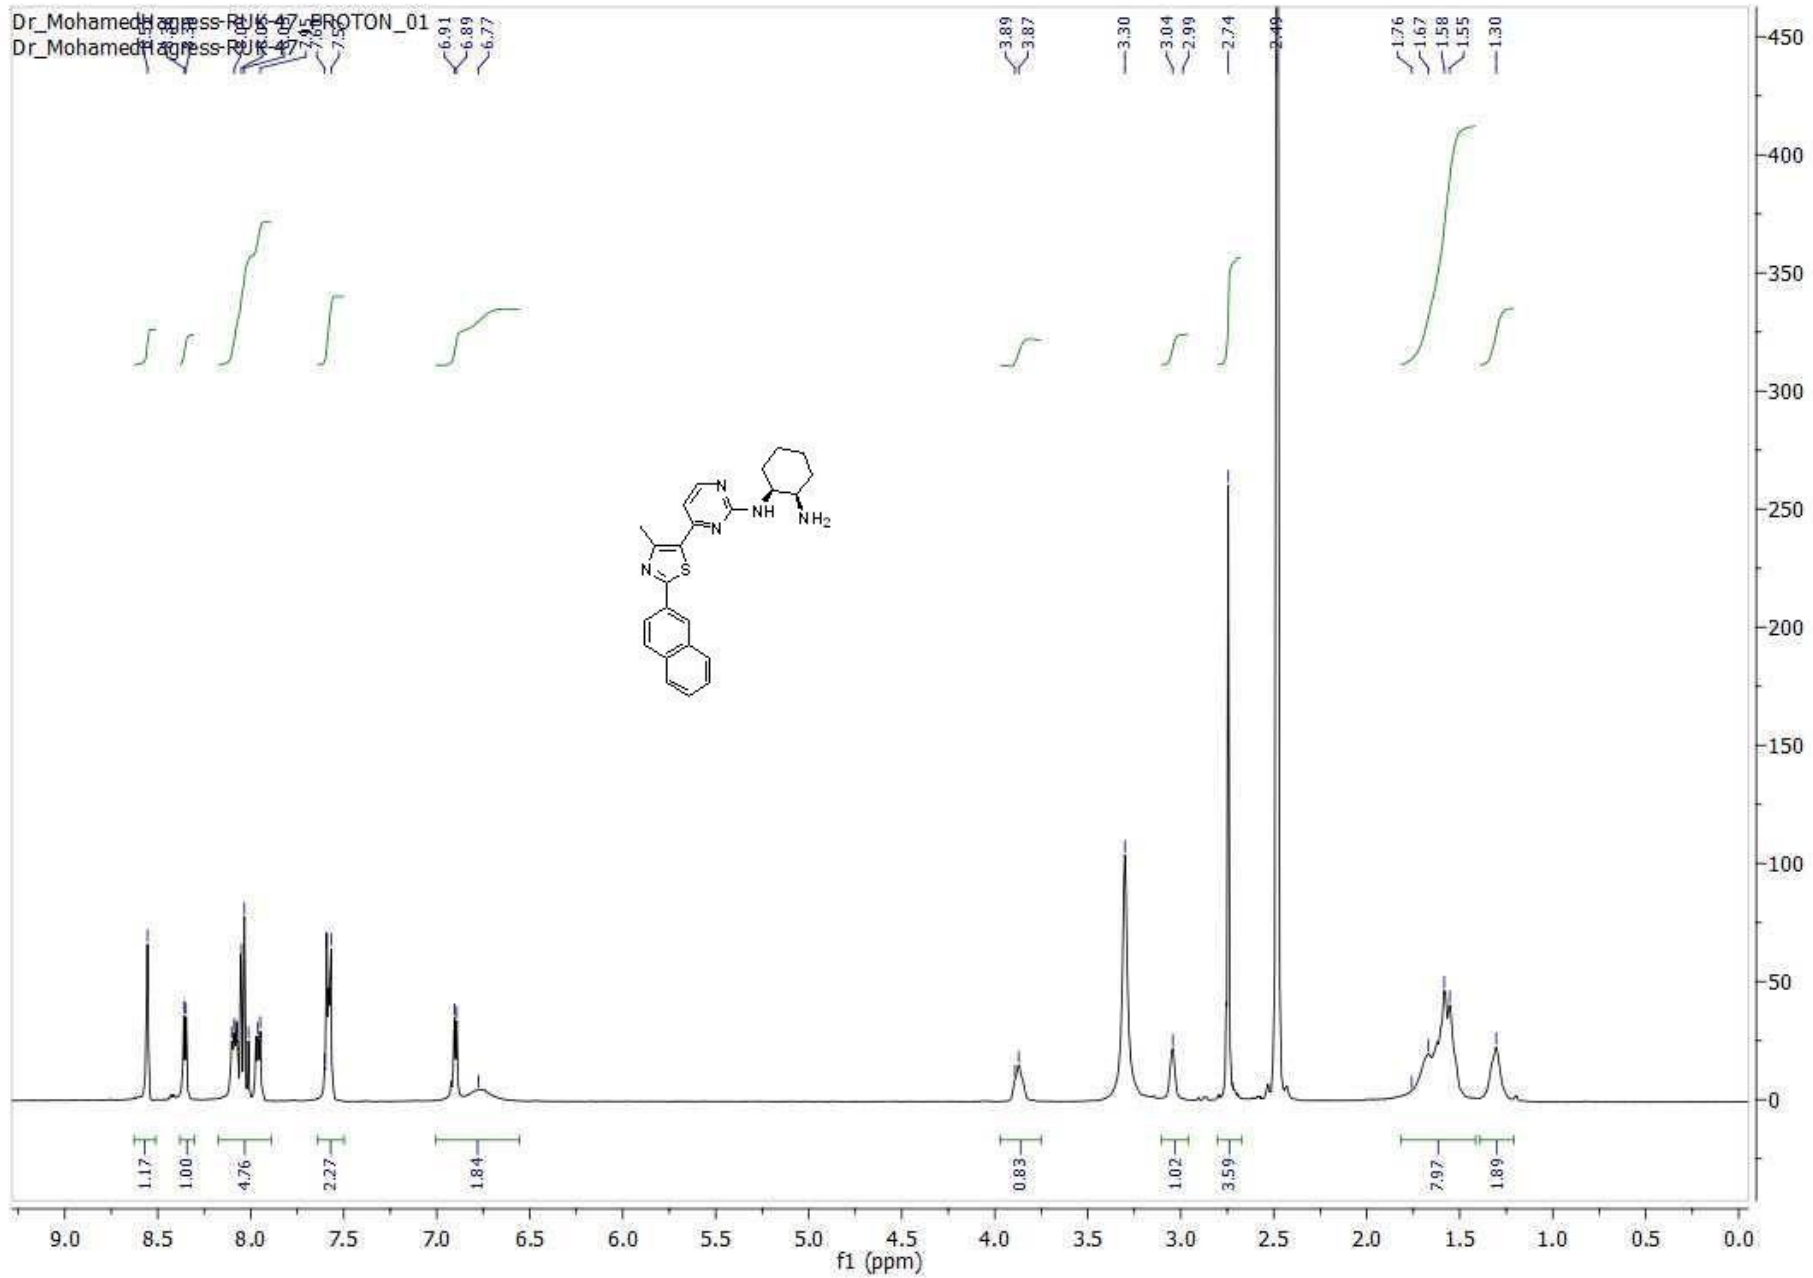

Dr\_MohamedHagress-RUK-47\_CARBON\_01  
Dr\_MohamedHagress-RUK-47

166.56  
162.04  
159.54  
157.66  
153.62

134.26  
133.28  
132.43  
130.57  
129.38  
129.20  
128.21  
127.93  
127.52  
126.17  
123.85

106.83

53.09  
49.42  
40.60  
40.43  
40.30  
40.22  
40.18  
39.97  
39.76  
39.55  
39.34  
36.79  
32.31  
26.84  
23.95  
18.62

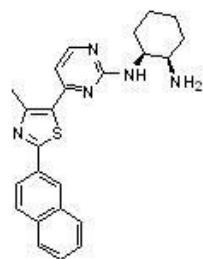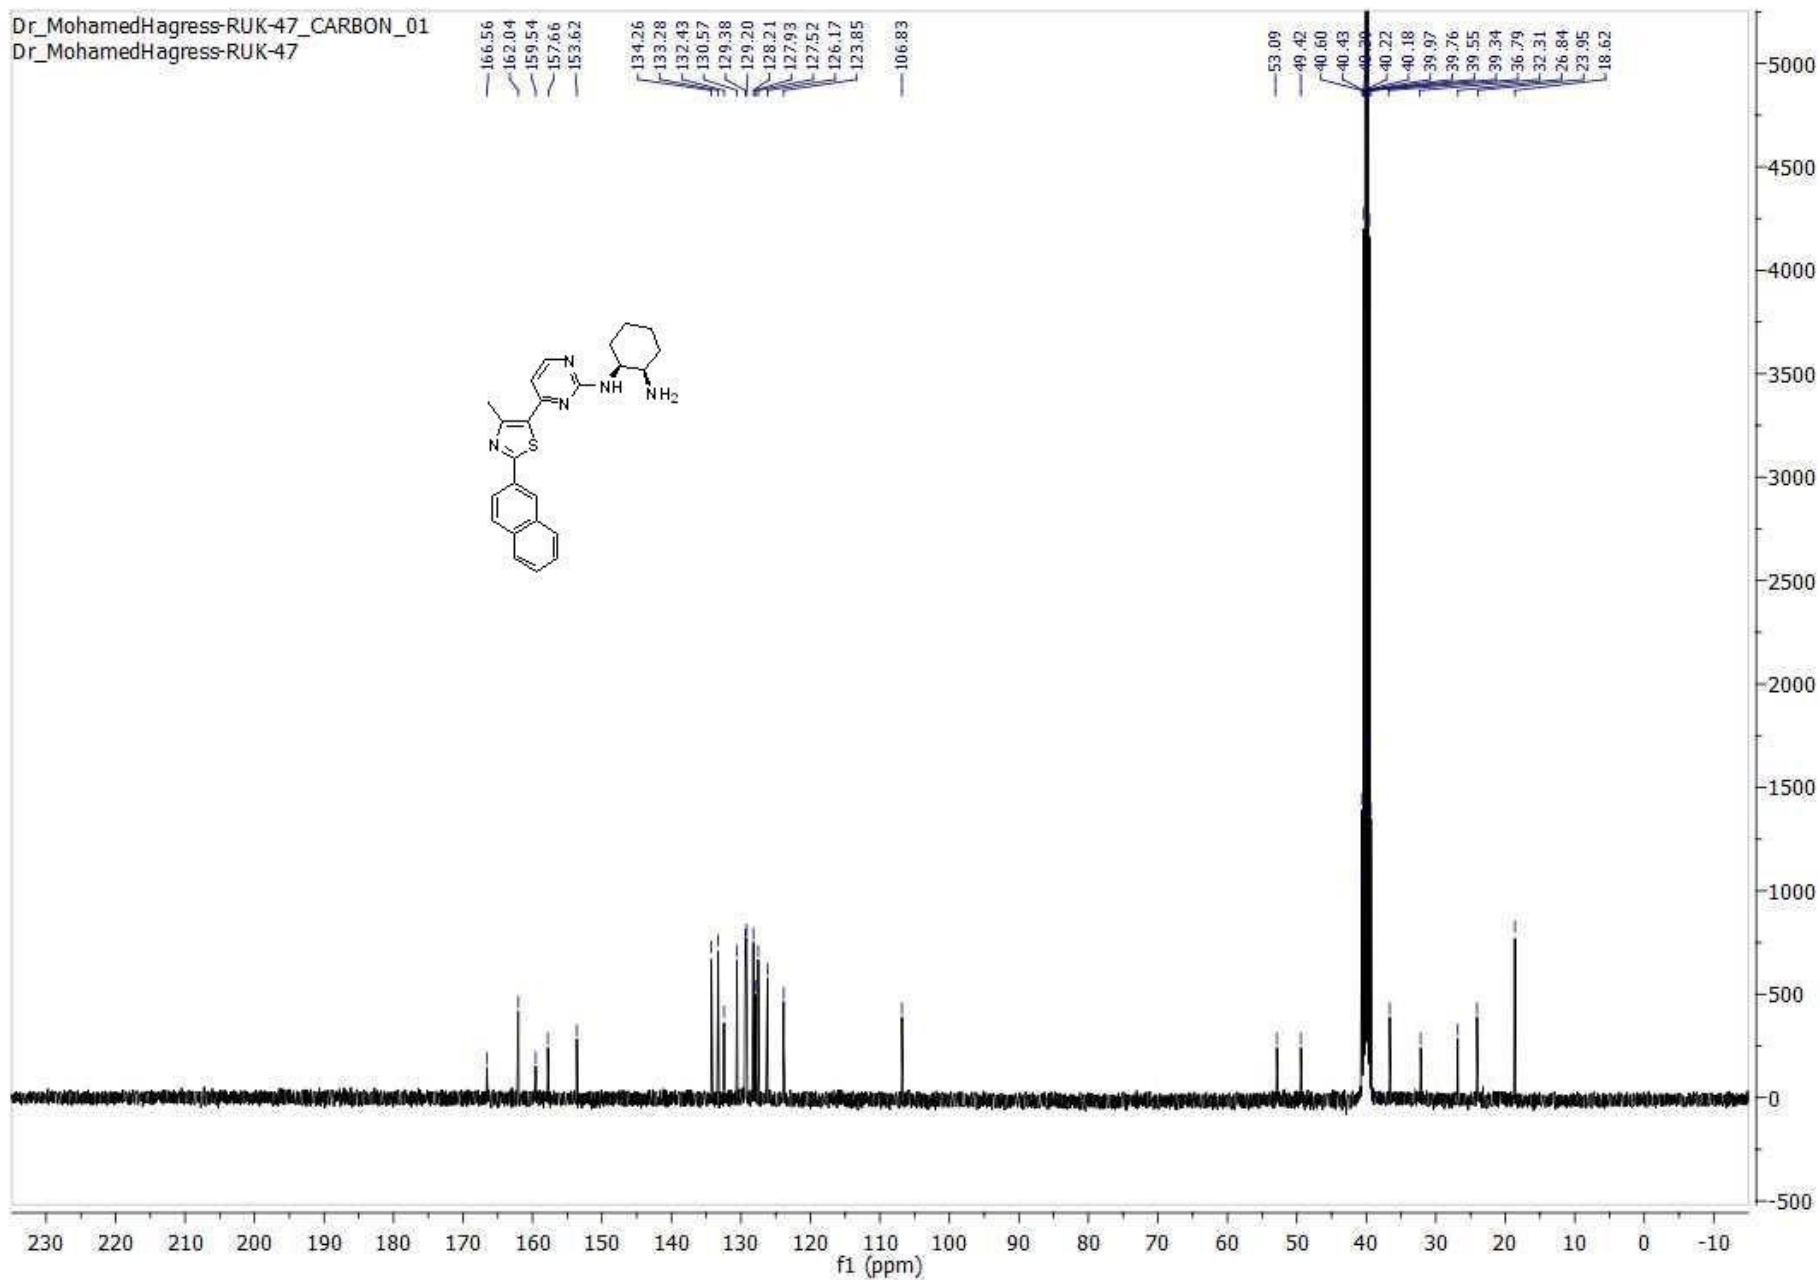

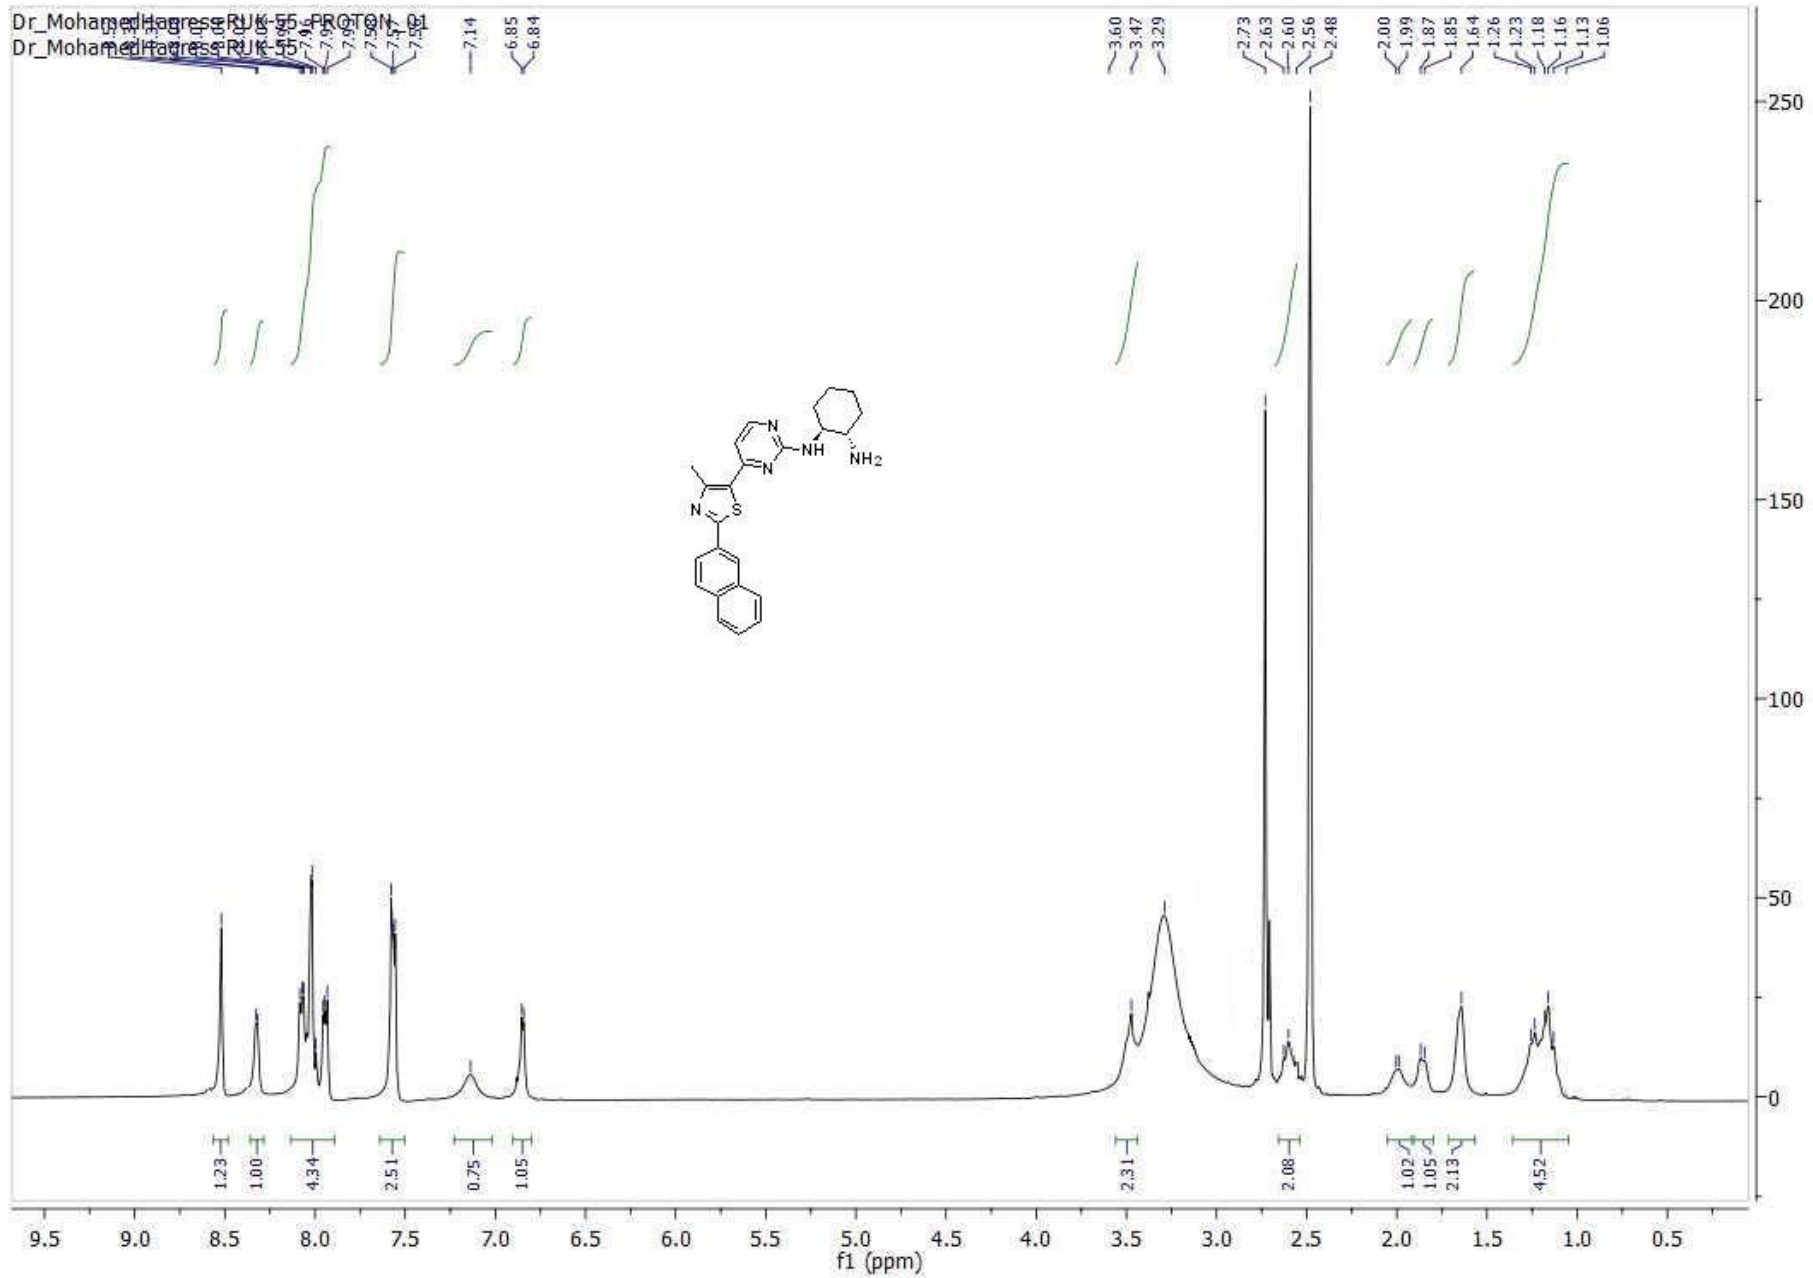

Dr\_MohamedHagress-RUK-55\_CARBON\_01  
Dr\_MohamedHagress-RUK-55

166.44  
162.74  
159.42  
157.28  
153.56  
134.23  
133.25  
132.41  
130.57  
129.38  
129.31  
129.19  
128.19  
127.90  
126.09  
123.85  
106.70

57.98  
54.06

36.80  
35.03  
31.93  
25.26  
18.60

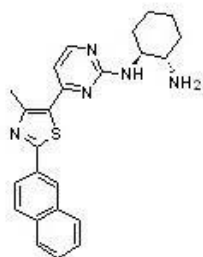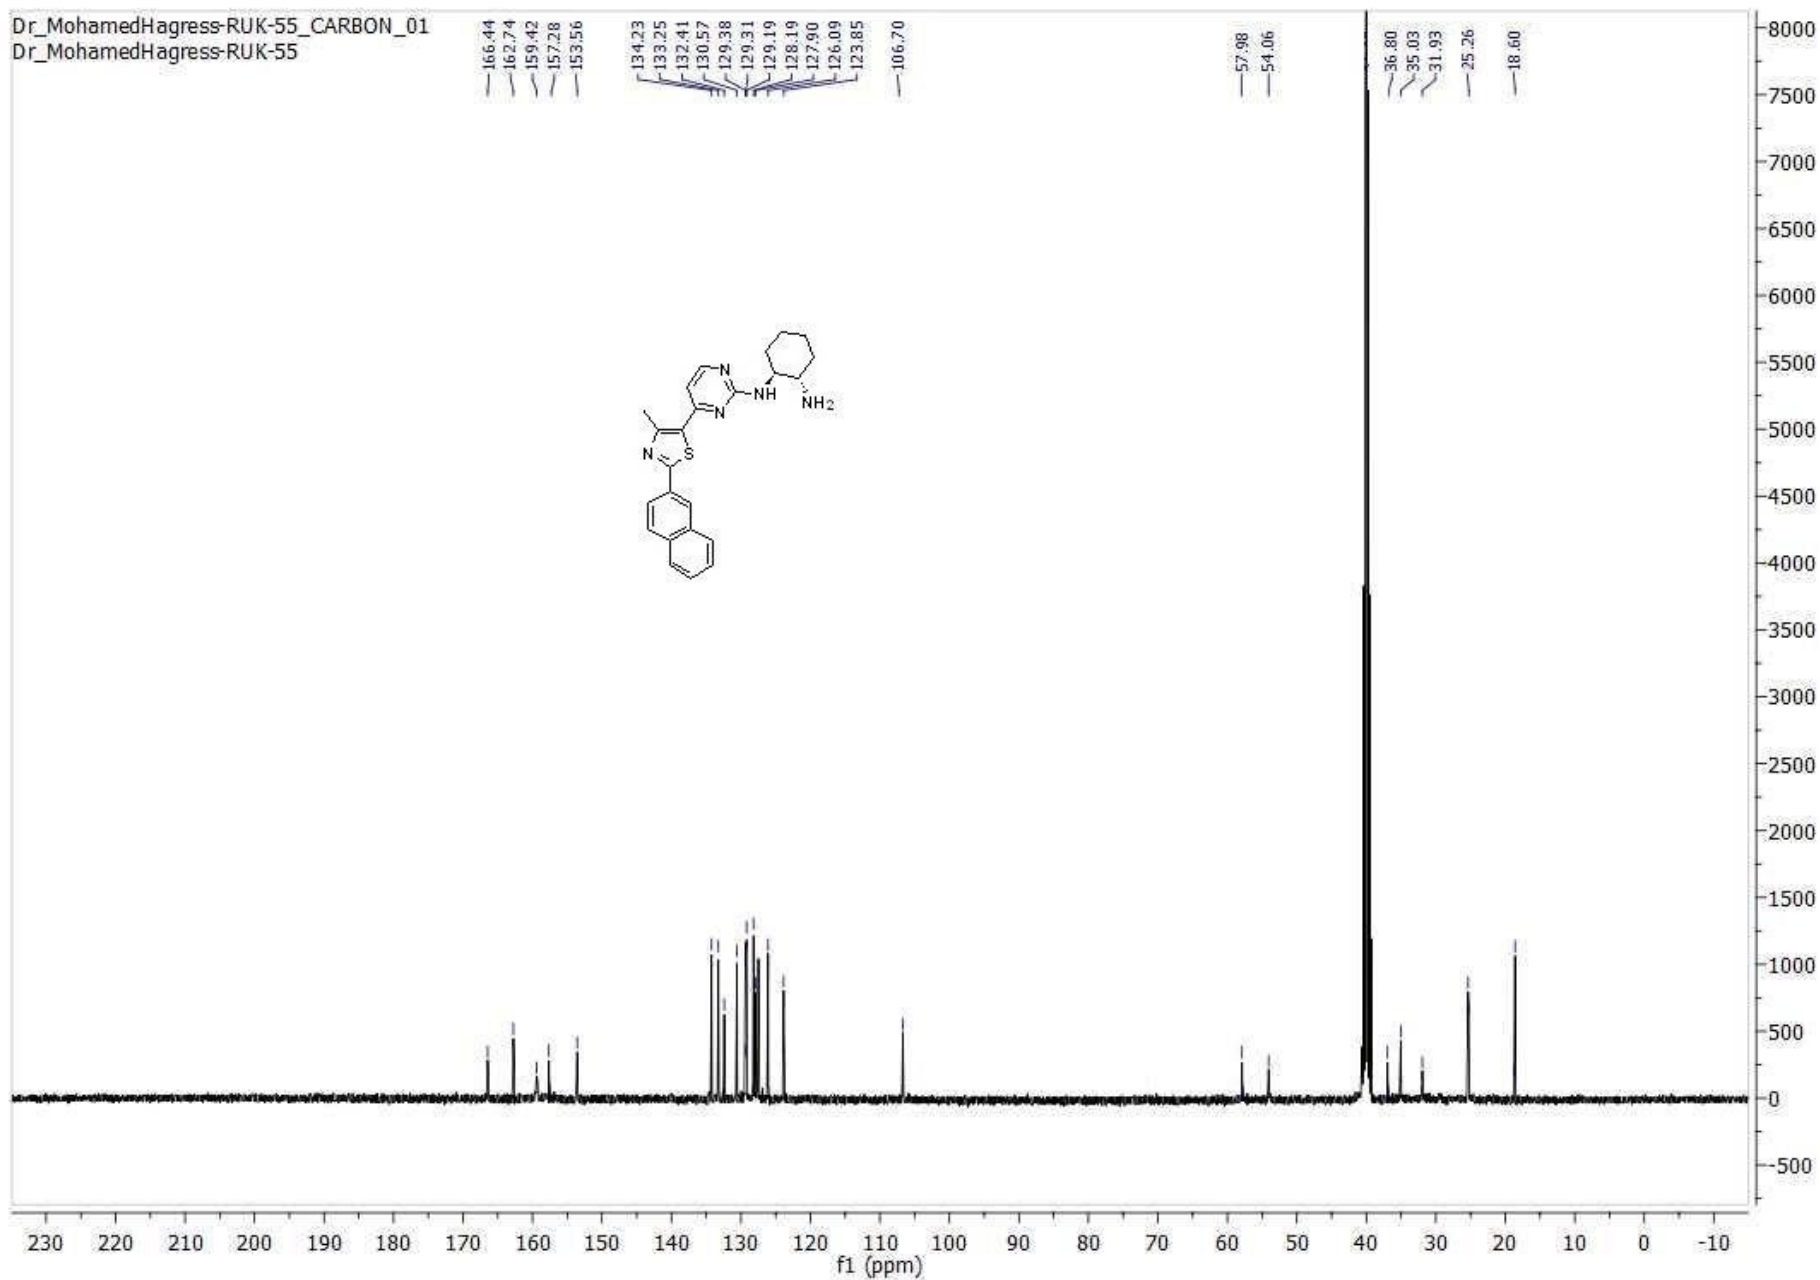

Dr\_MohamedHagressRHK57 PRGTON\_01  
Dr\_MohamedHagressRHK57

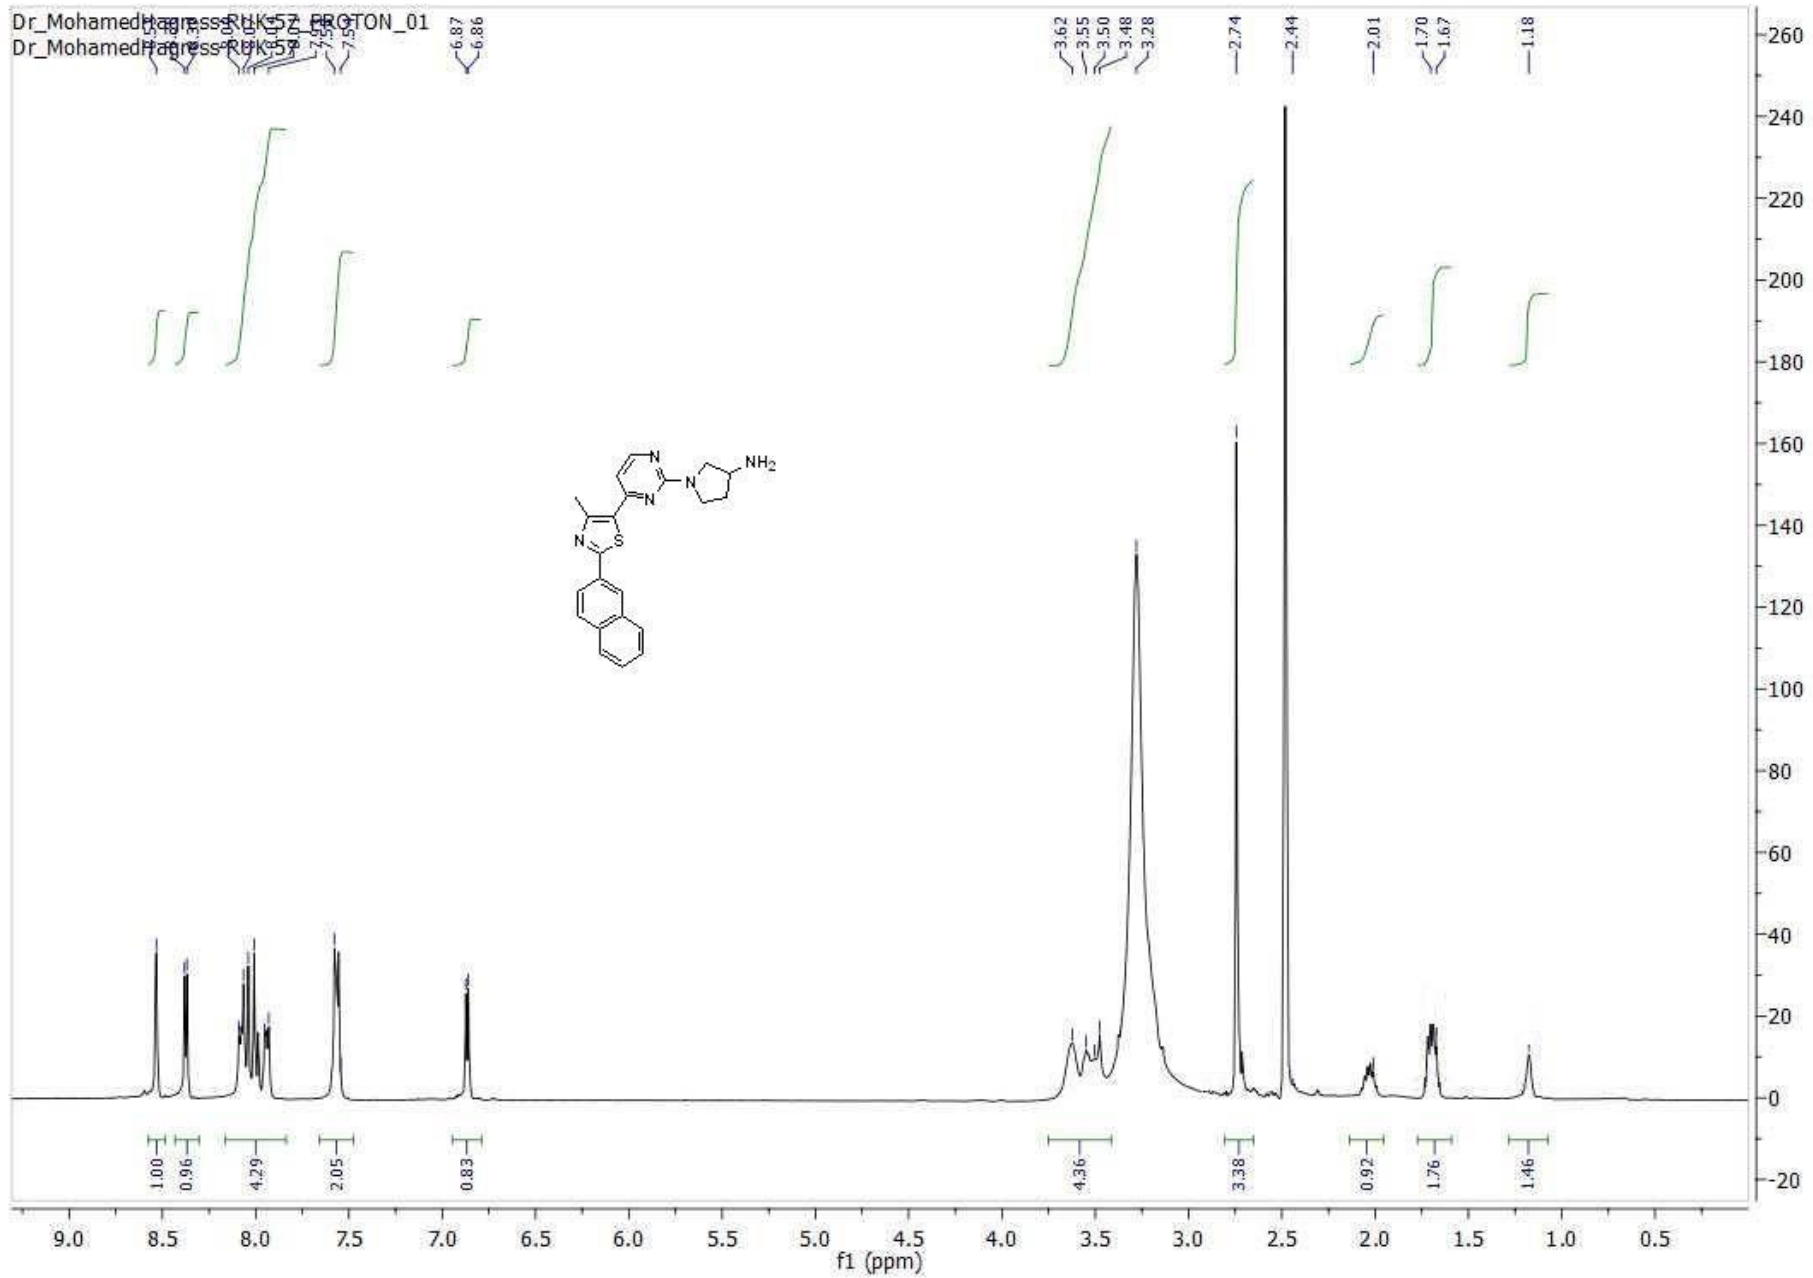



Dr\_MohamedHagress-RUK-57\_CARBON\_01  
Dr\_MohamedHagress-RUK-57

166.53  
160.13  
159.26  
157.87  
153.73  
134.24  
133.28  
132.39  
130.55  
129.31  
129.17  
128.17  
127.89  
127.48  
126.17  
123.80  
105.95

55.14  
51.13  
45.33  
40.56  
40.35  
40.14  
39.94  
39.73  
39.52  
39.31  
34.35

18.74

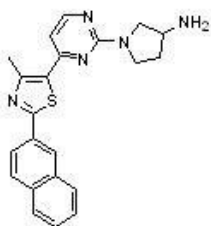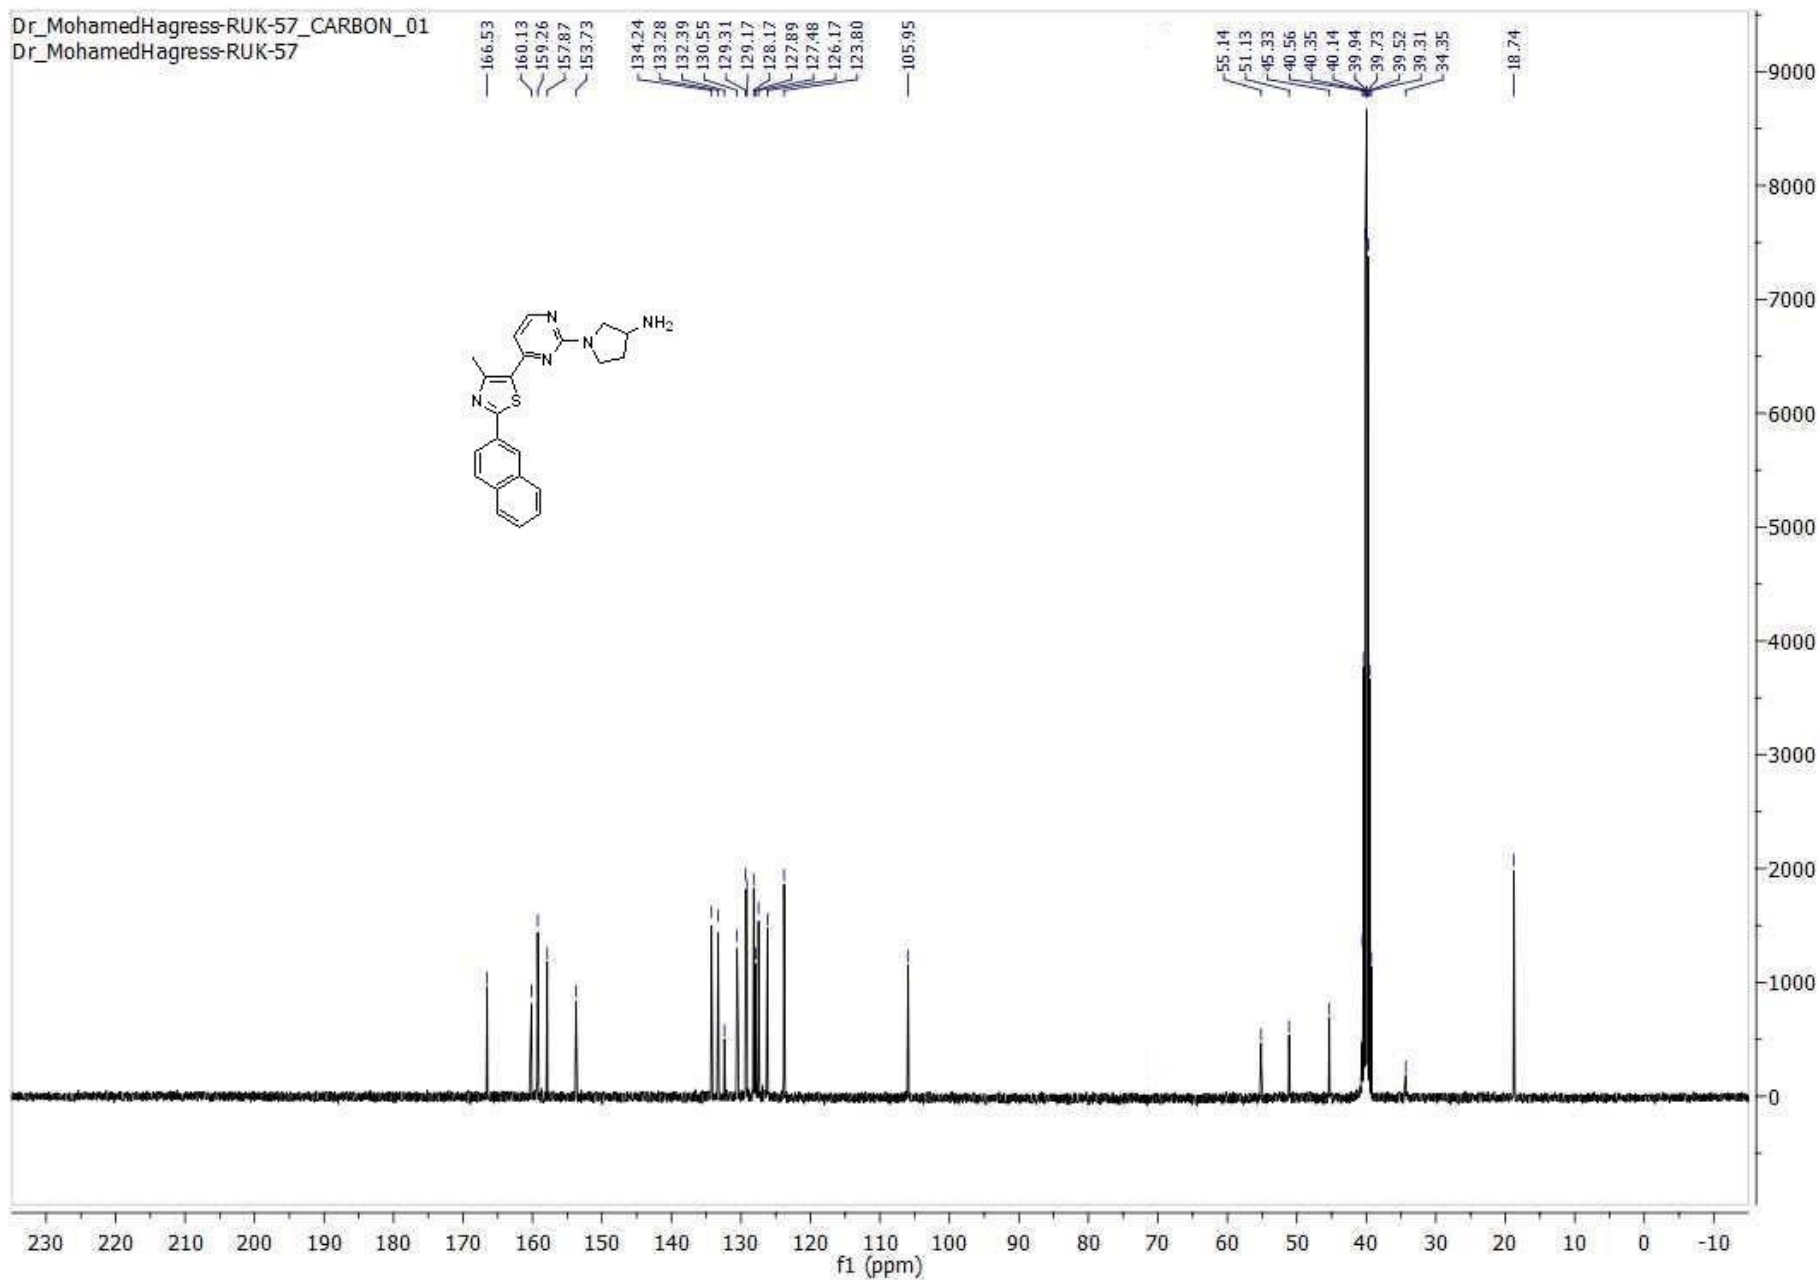

Dr\_MohamedHagress-RUK-5a\_PROTON\_01  
Dr\_MohamedHagress-RUK-5a

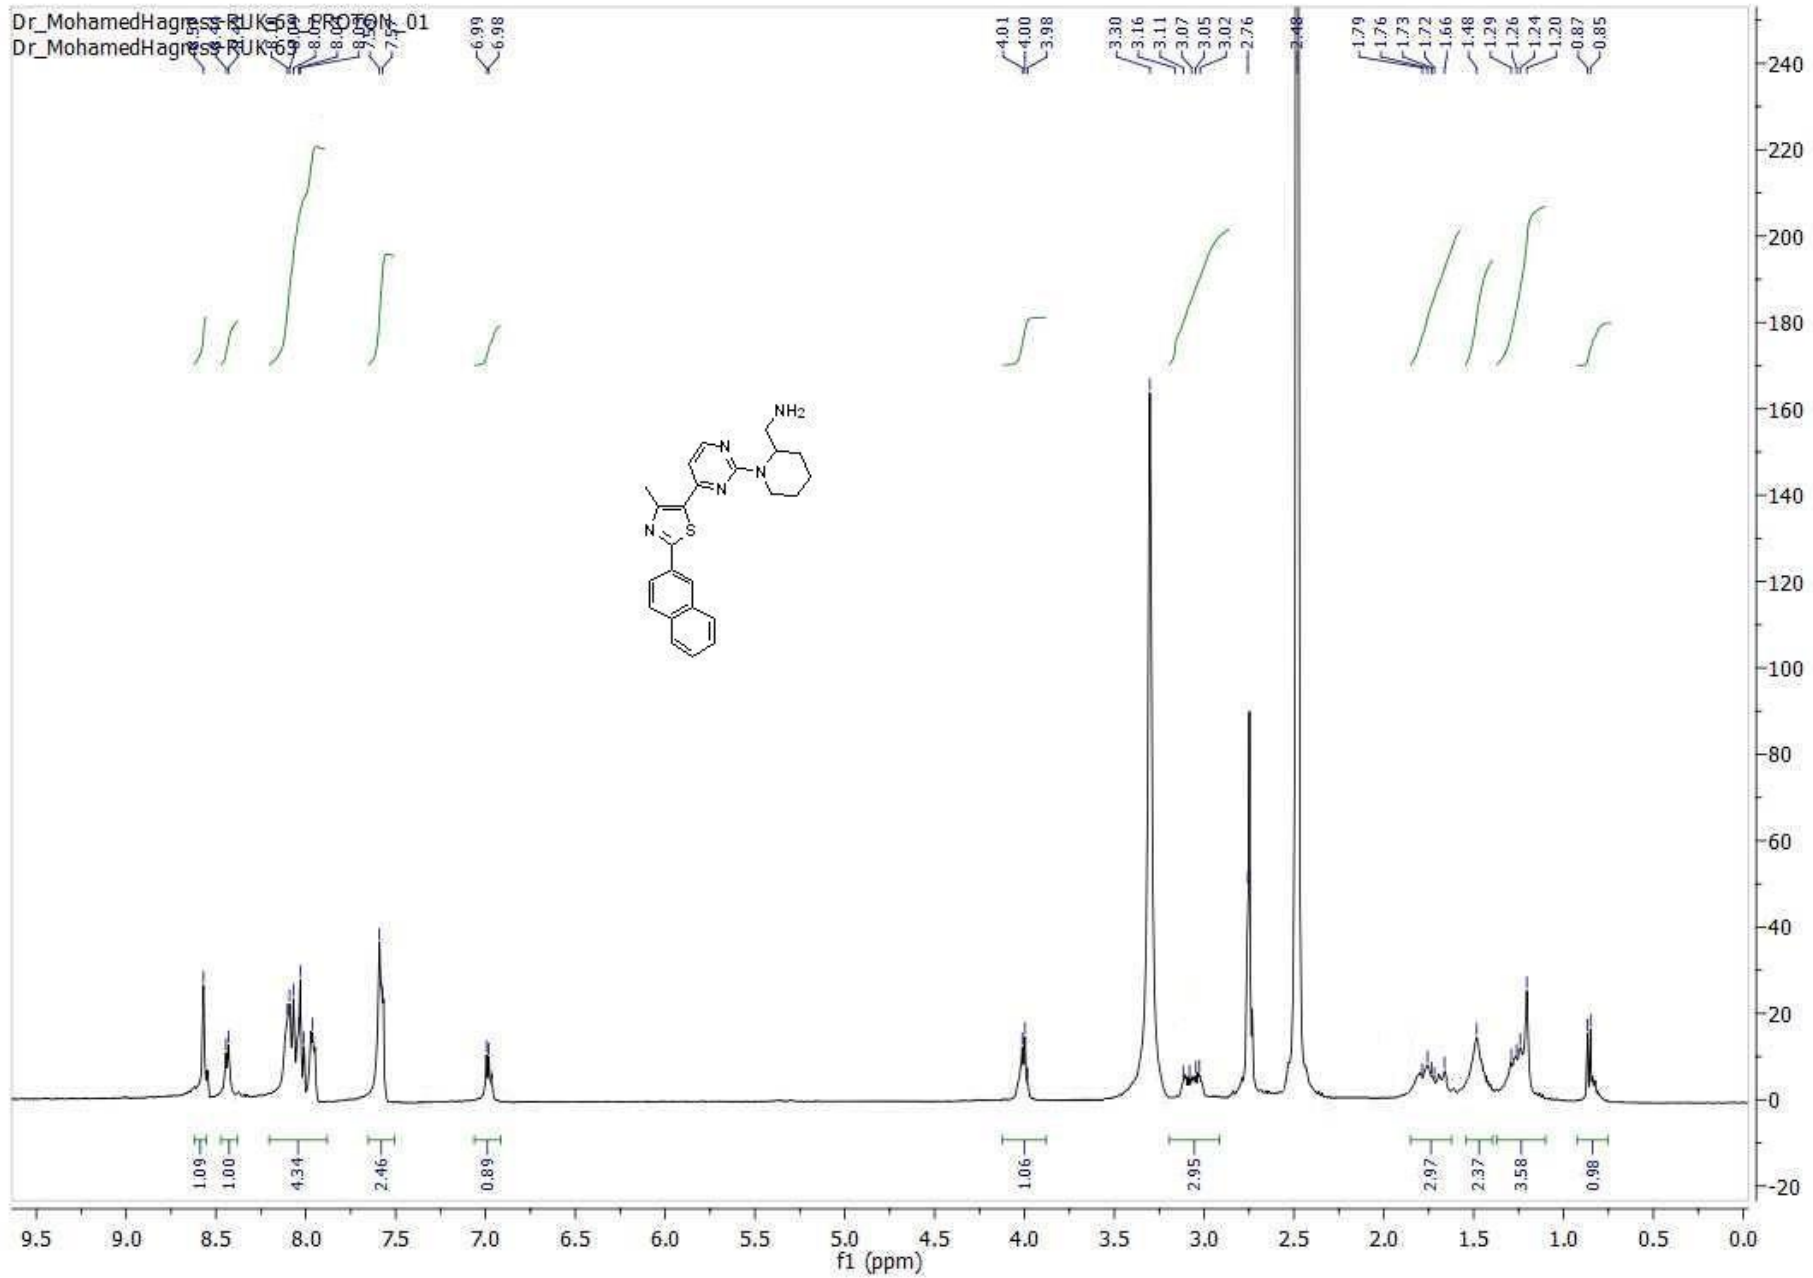

Dr\_MohamedHagress-RUK-63\_CARBON\_01  
Dr\_MohamedHagress-RUK-63

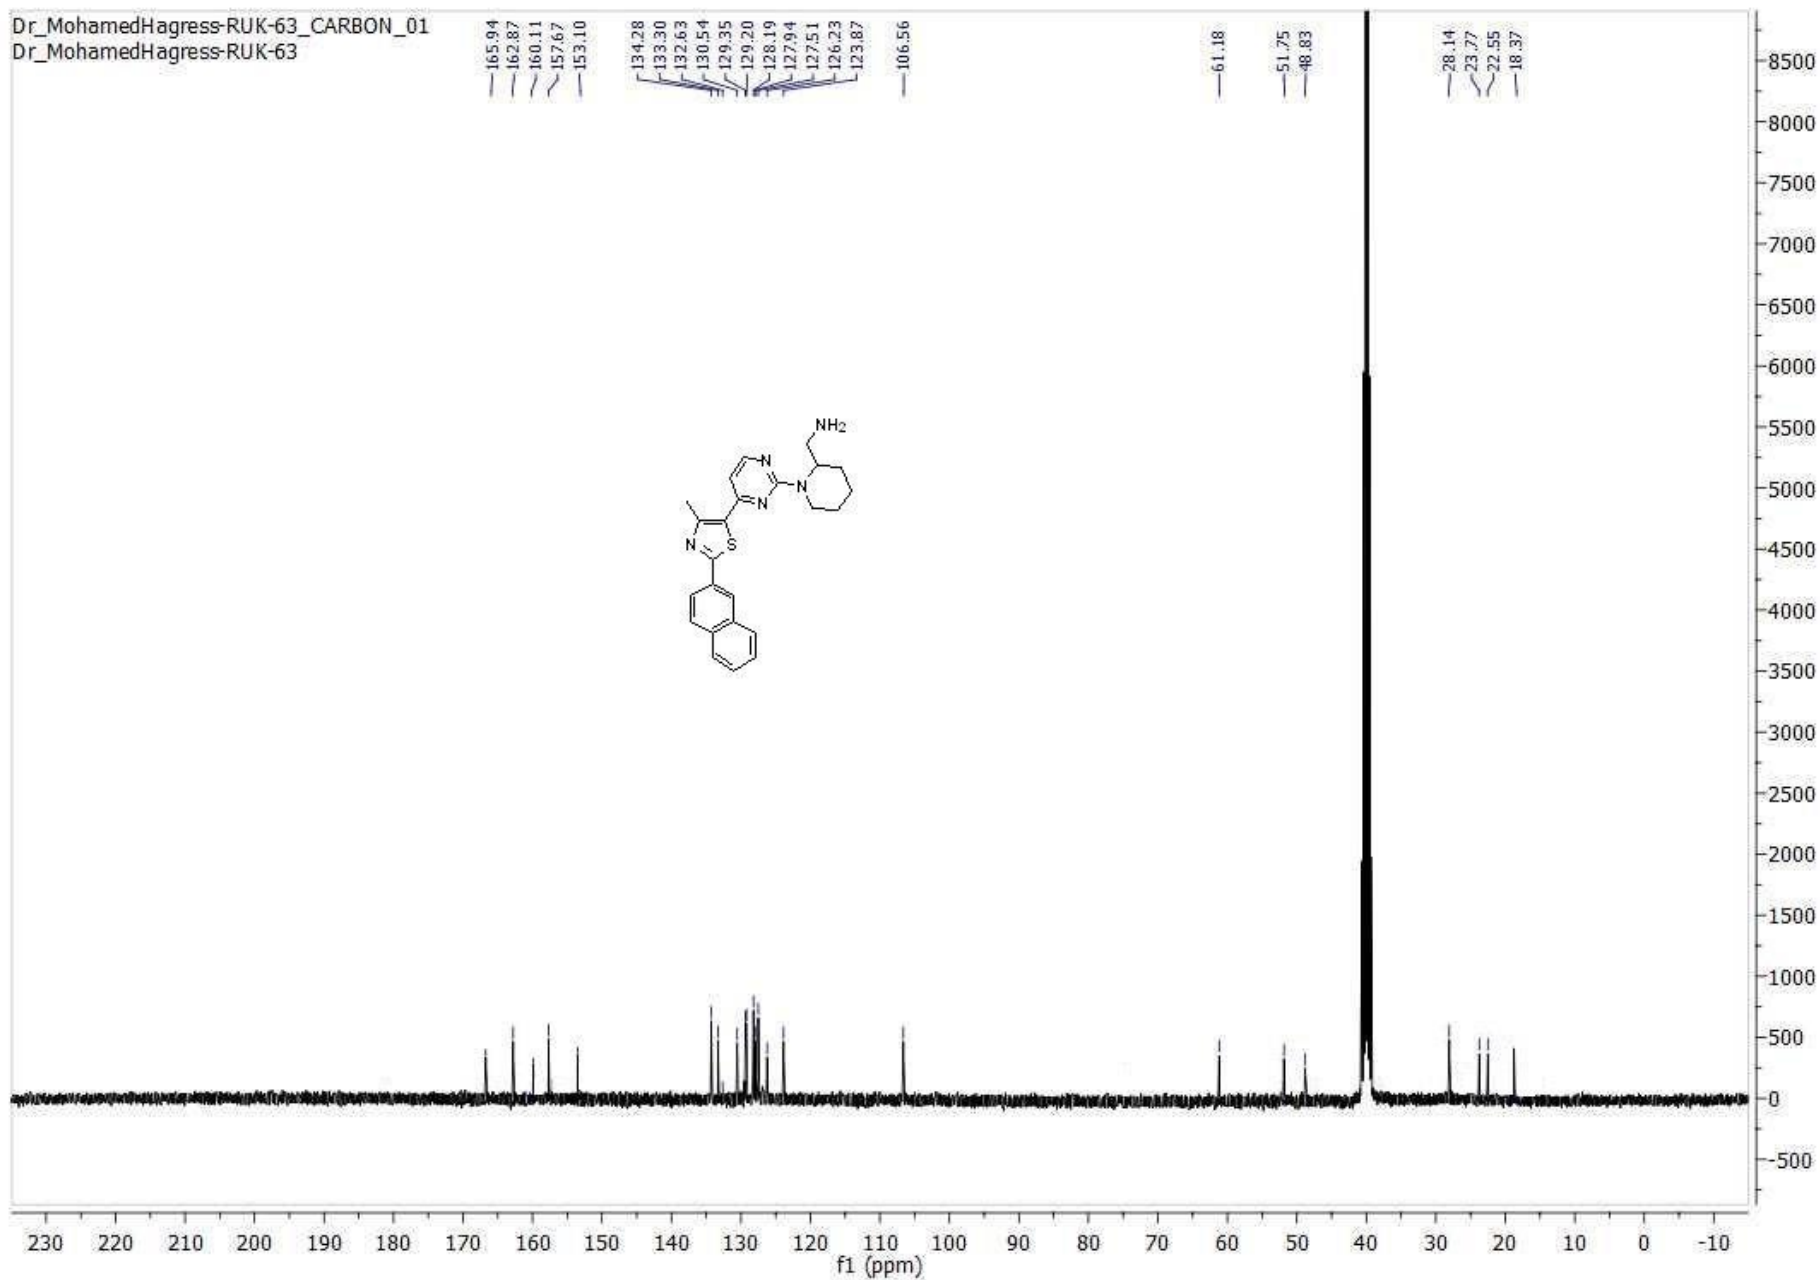

Dr\_MohamedHagress\_RUK-50\_PROTON\_01  
Dr\_MohamedHagress\_RUK-50

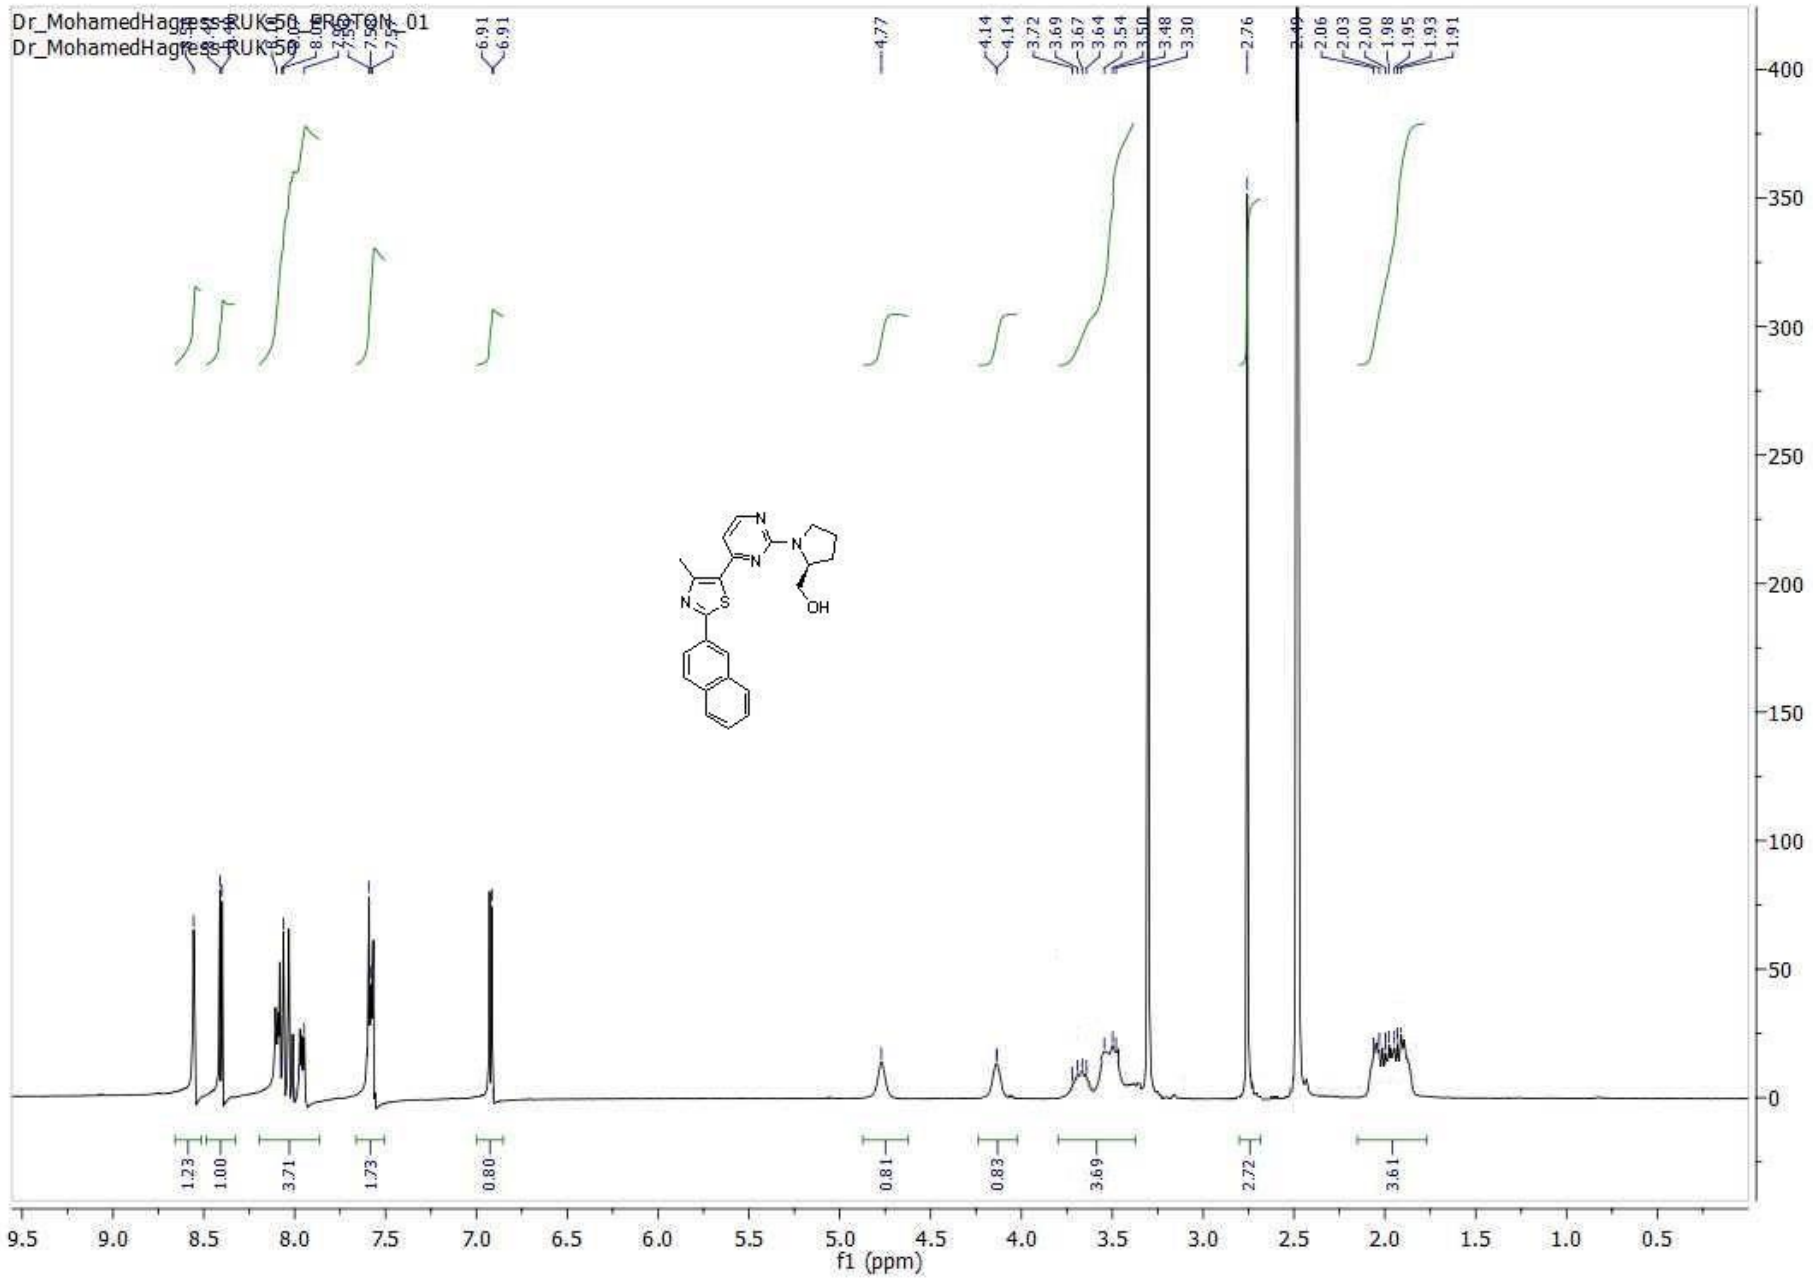

Dr\_MohamedHagress-RUK-50\_CARBON\_01  
Dr\_MohamedHagress-RUK-50

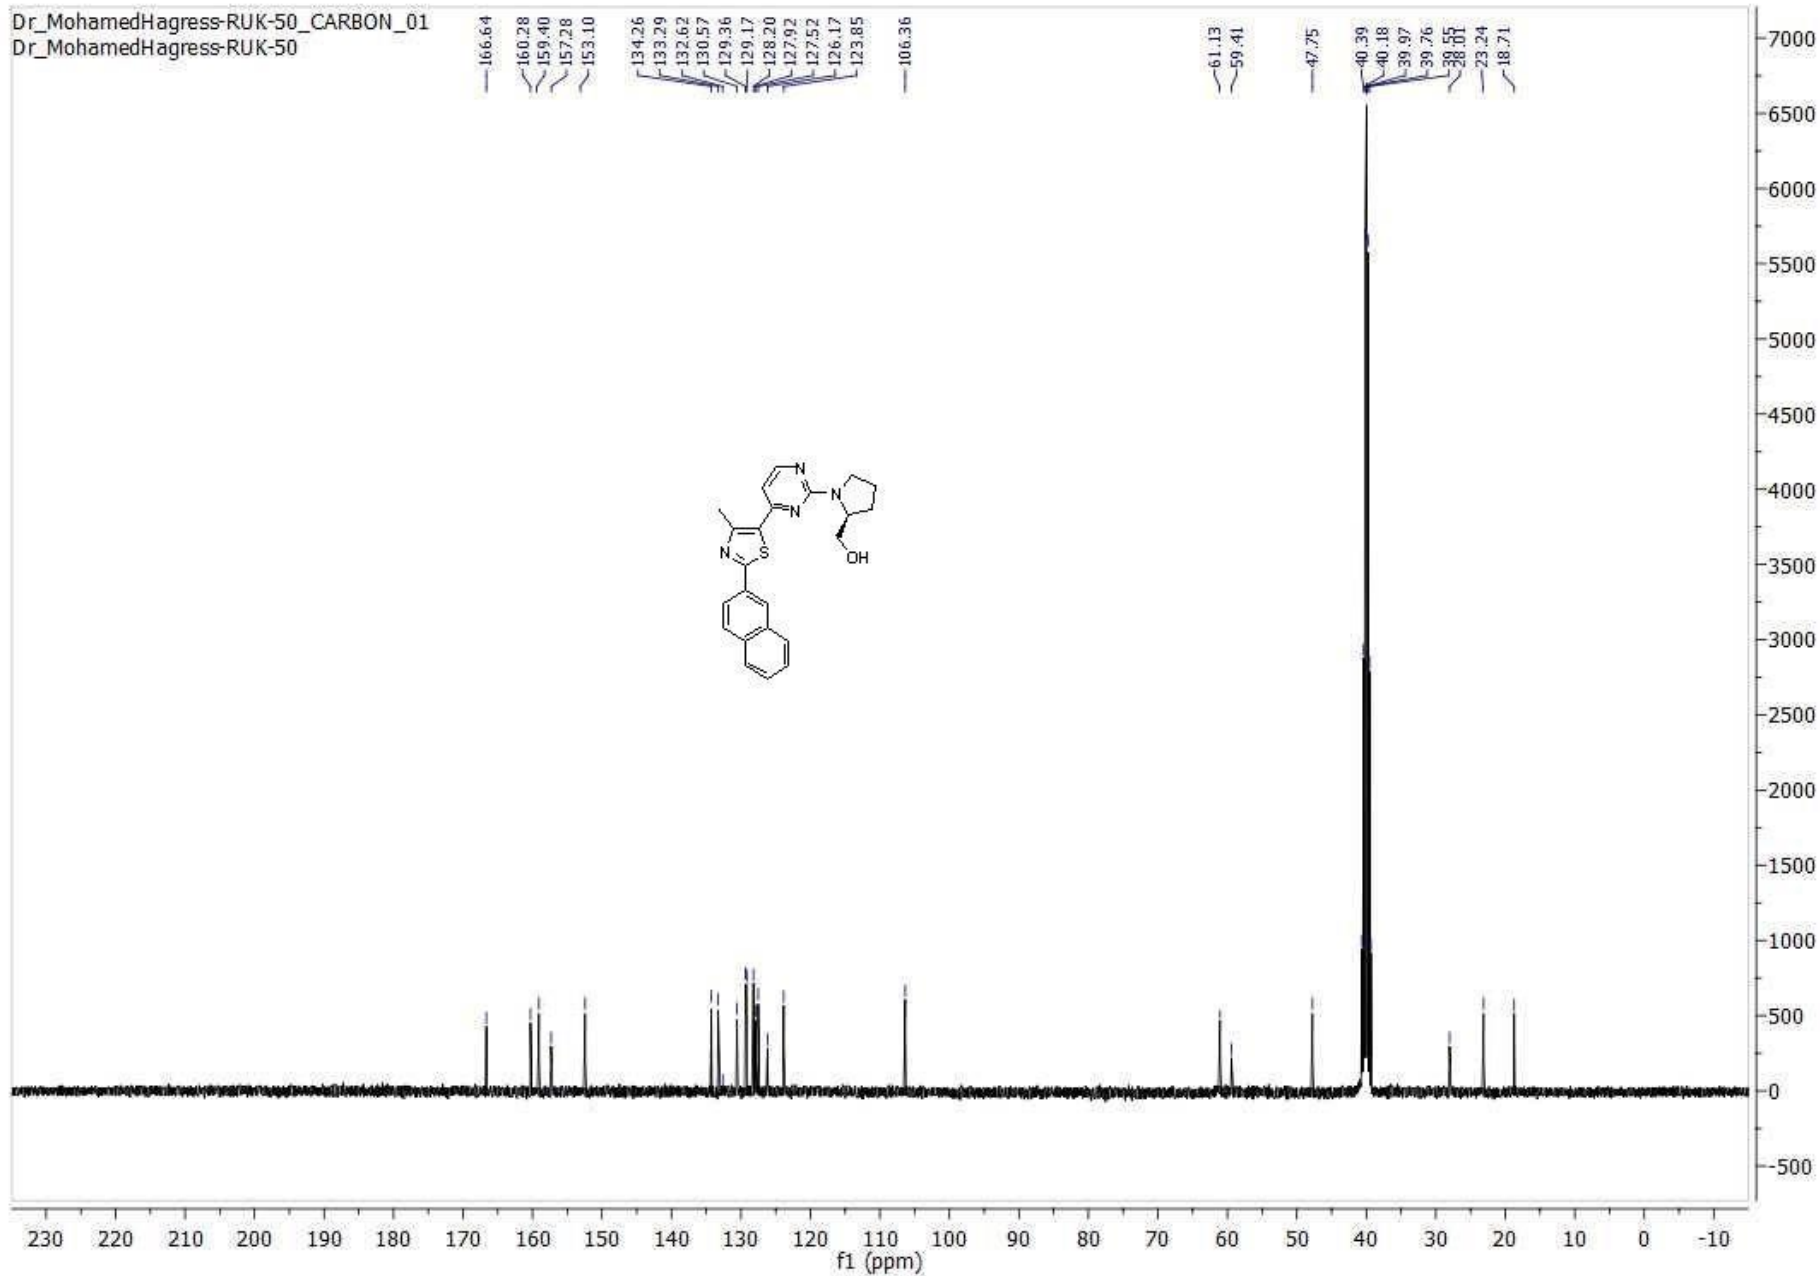

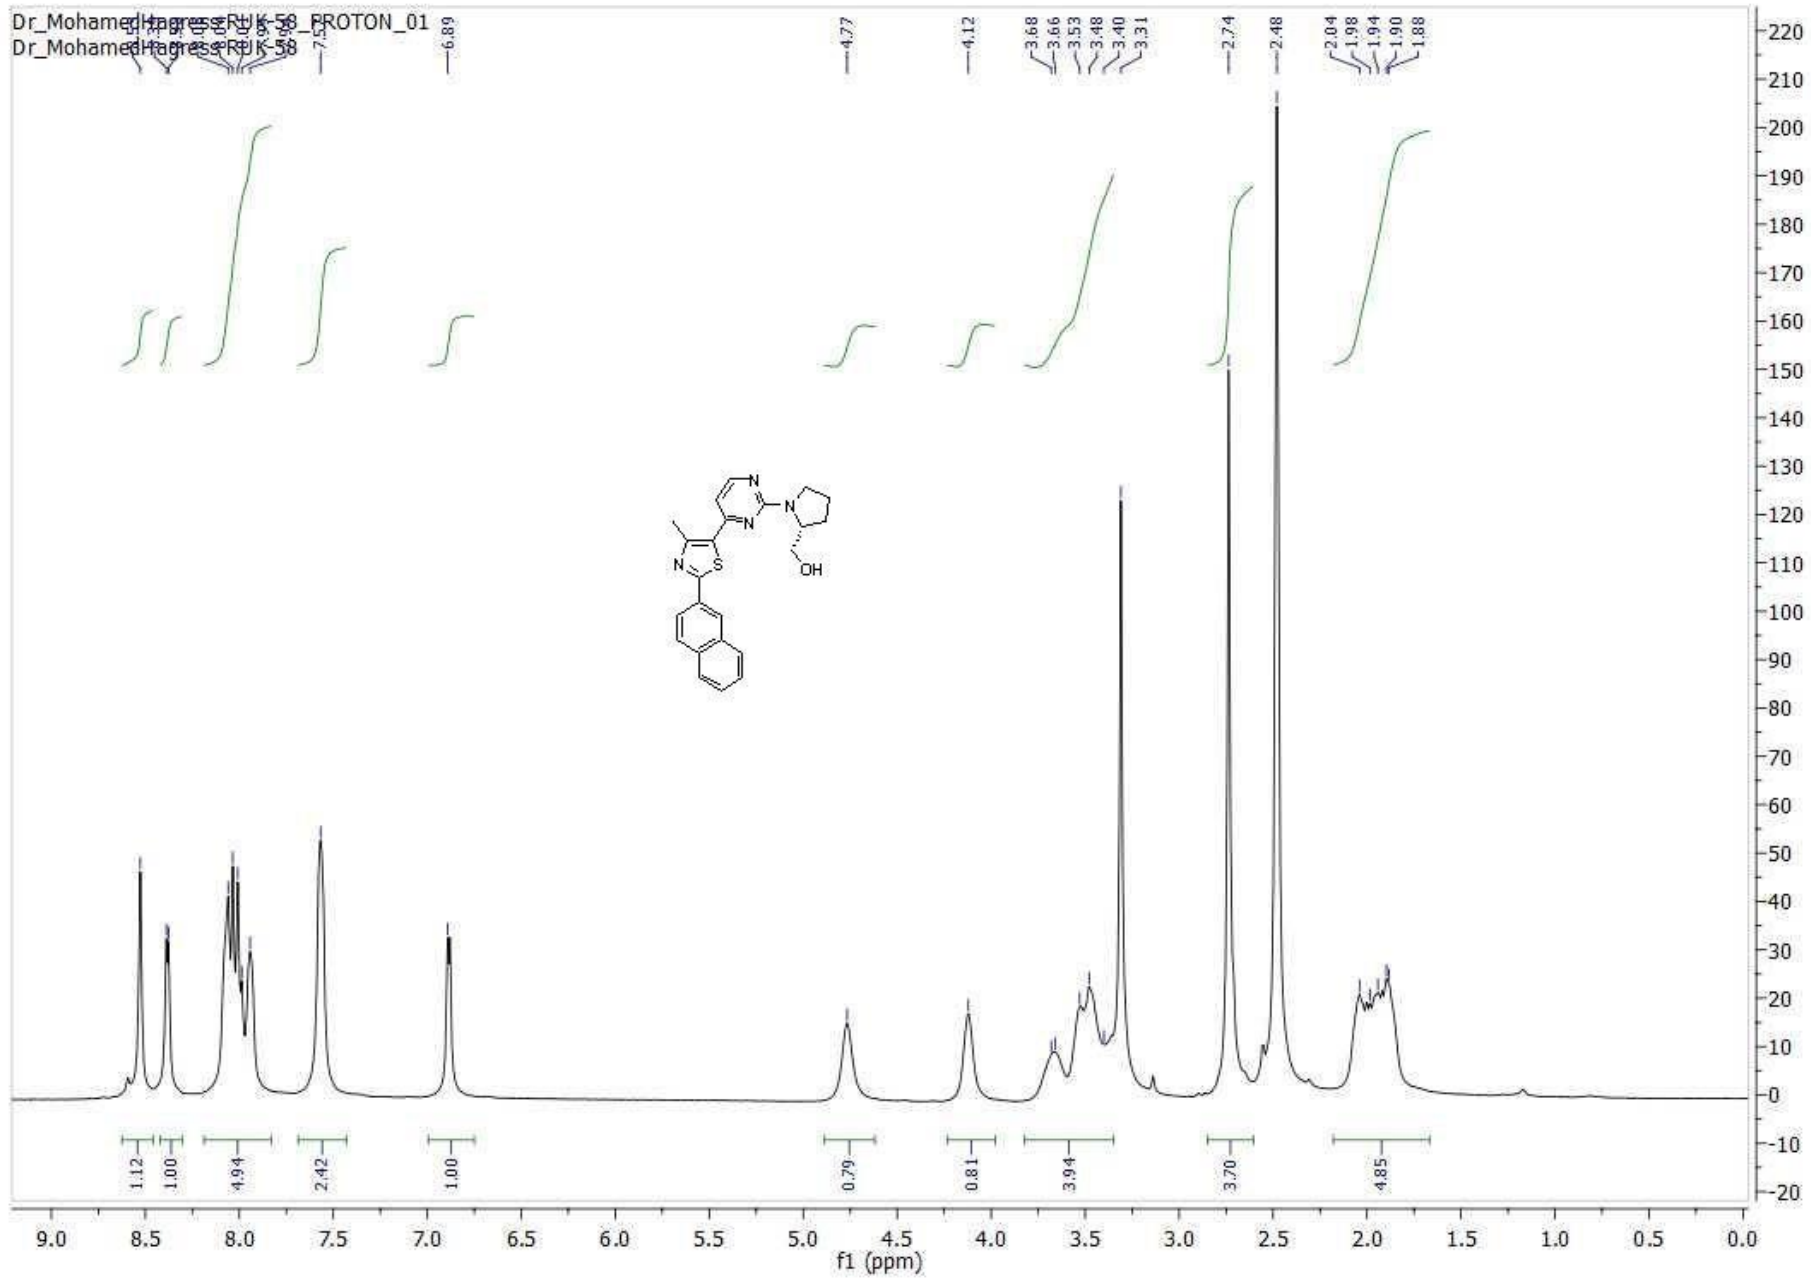

Dr\_MohamedHagress-RUK-58\_CARBON\_01  
Dr\_MohamedHagress-RUK-58

166.59  
160.25  
159.20  
157.67  
153.75  
134.24  
133.27  
131.92  
130.56  
129.31  
129.16  
128.18  
127.88  
127.49  
126.13  
123.83  
106.32

61.12  
59.40  
47.73  
40.39  
40.18  
39.97  
39.76  
38.55  
23.20  
18.71

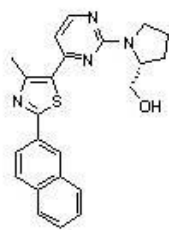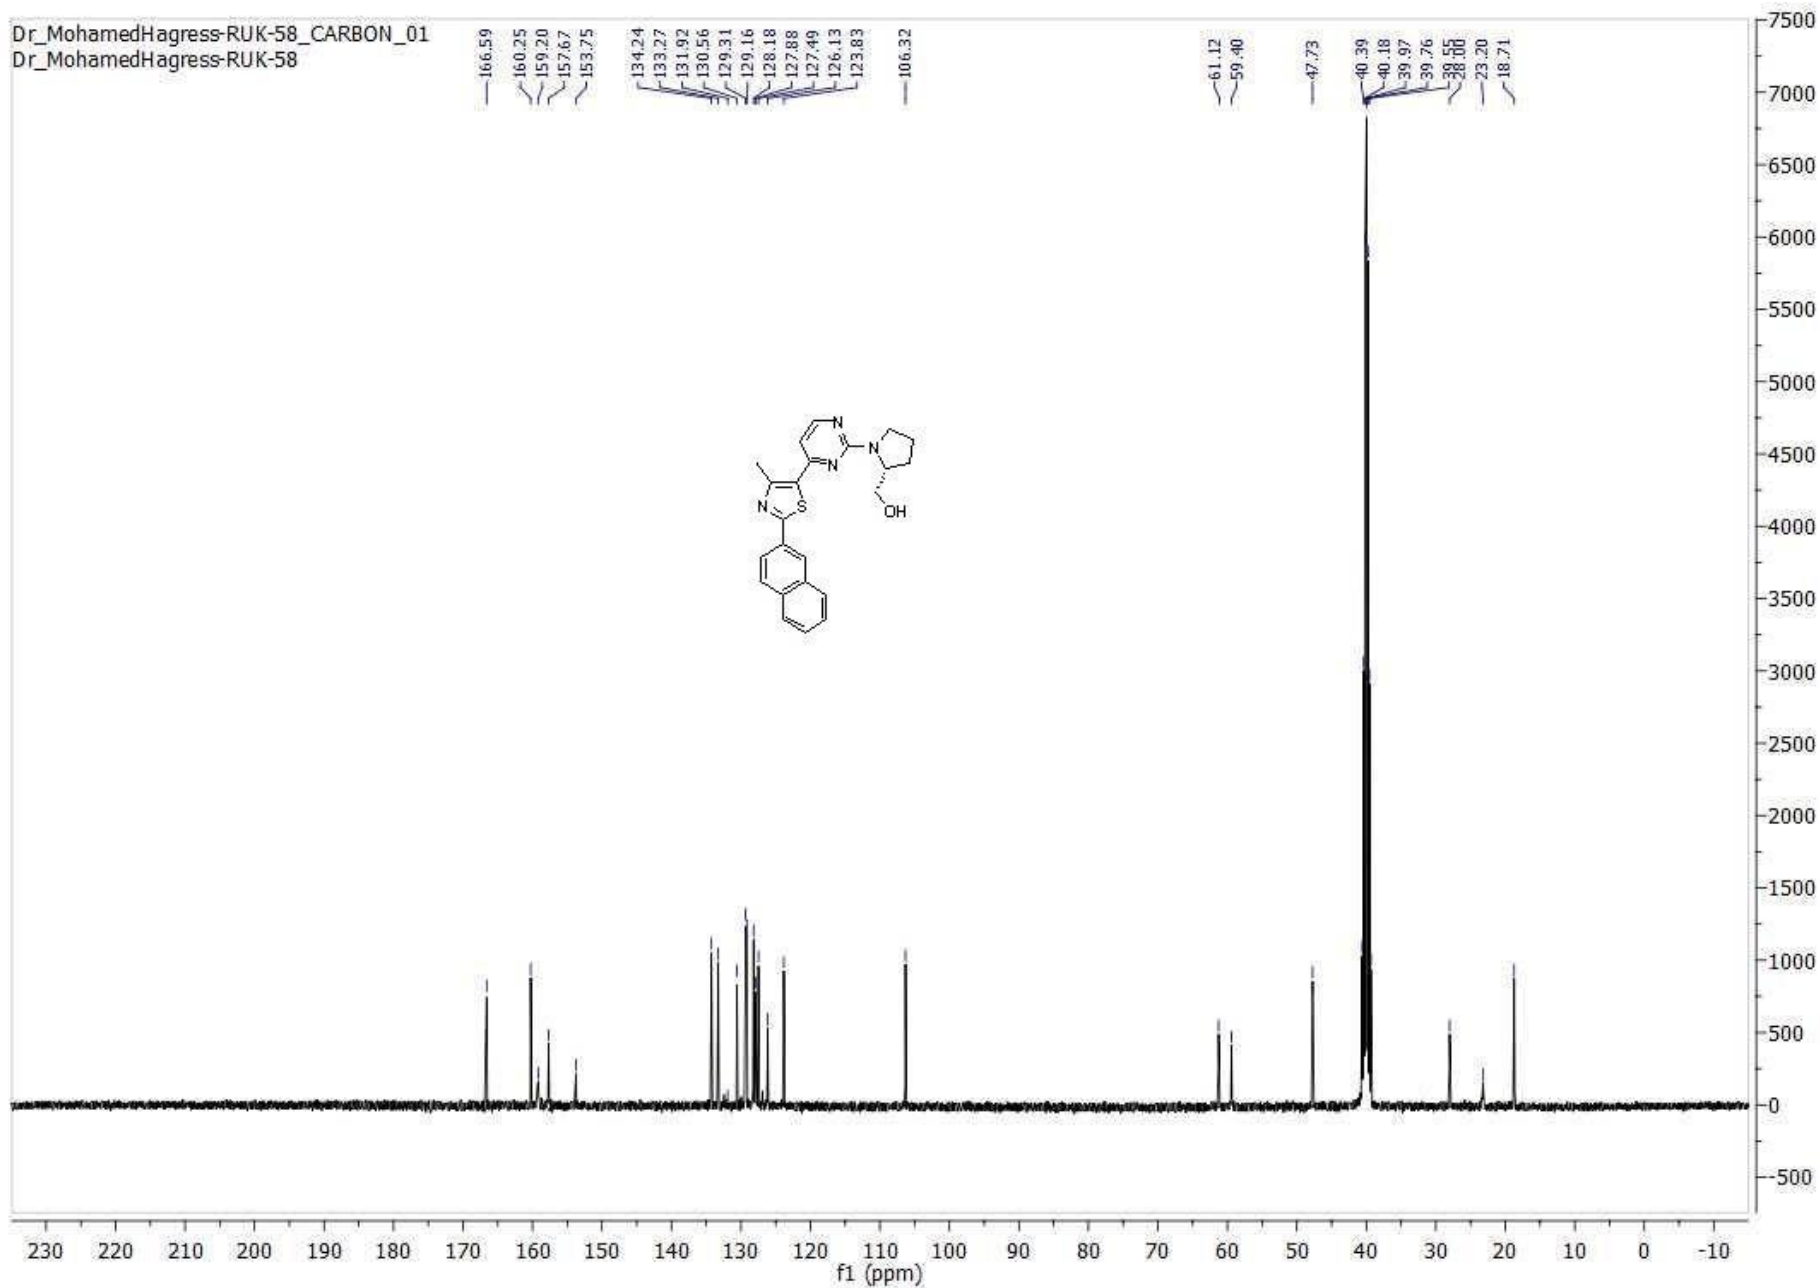

Dr\_MohamedHagress-RIK-55-PROTON\_01  
Dr\_MohamedHagress-RIK-55

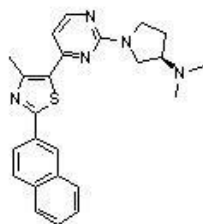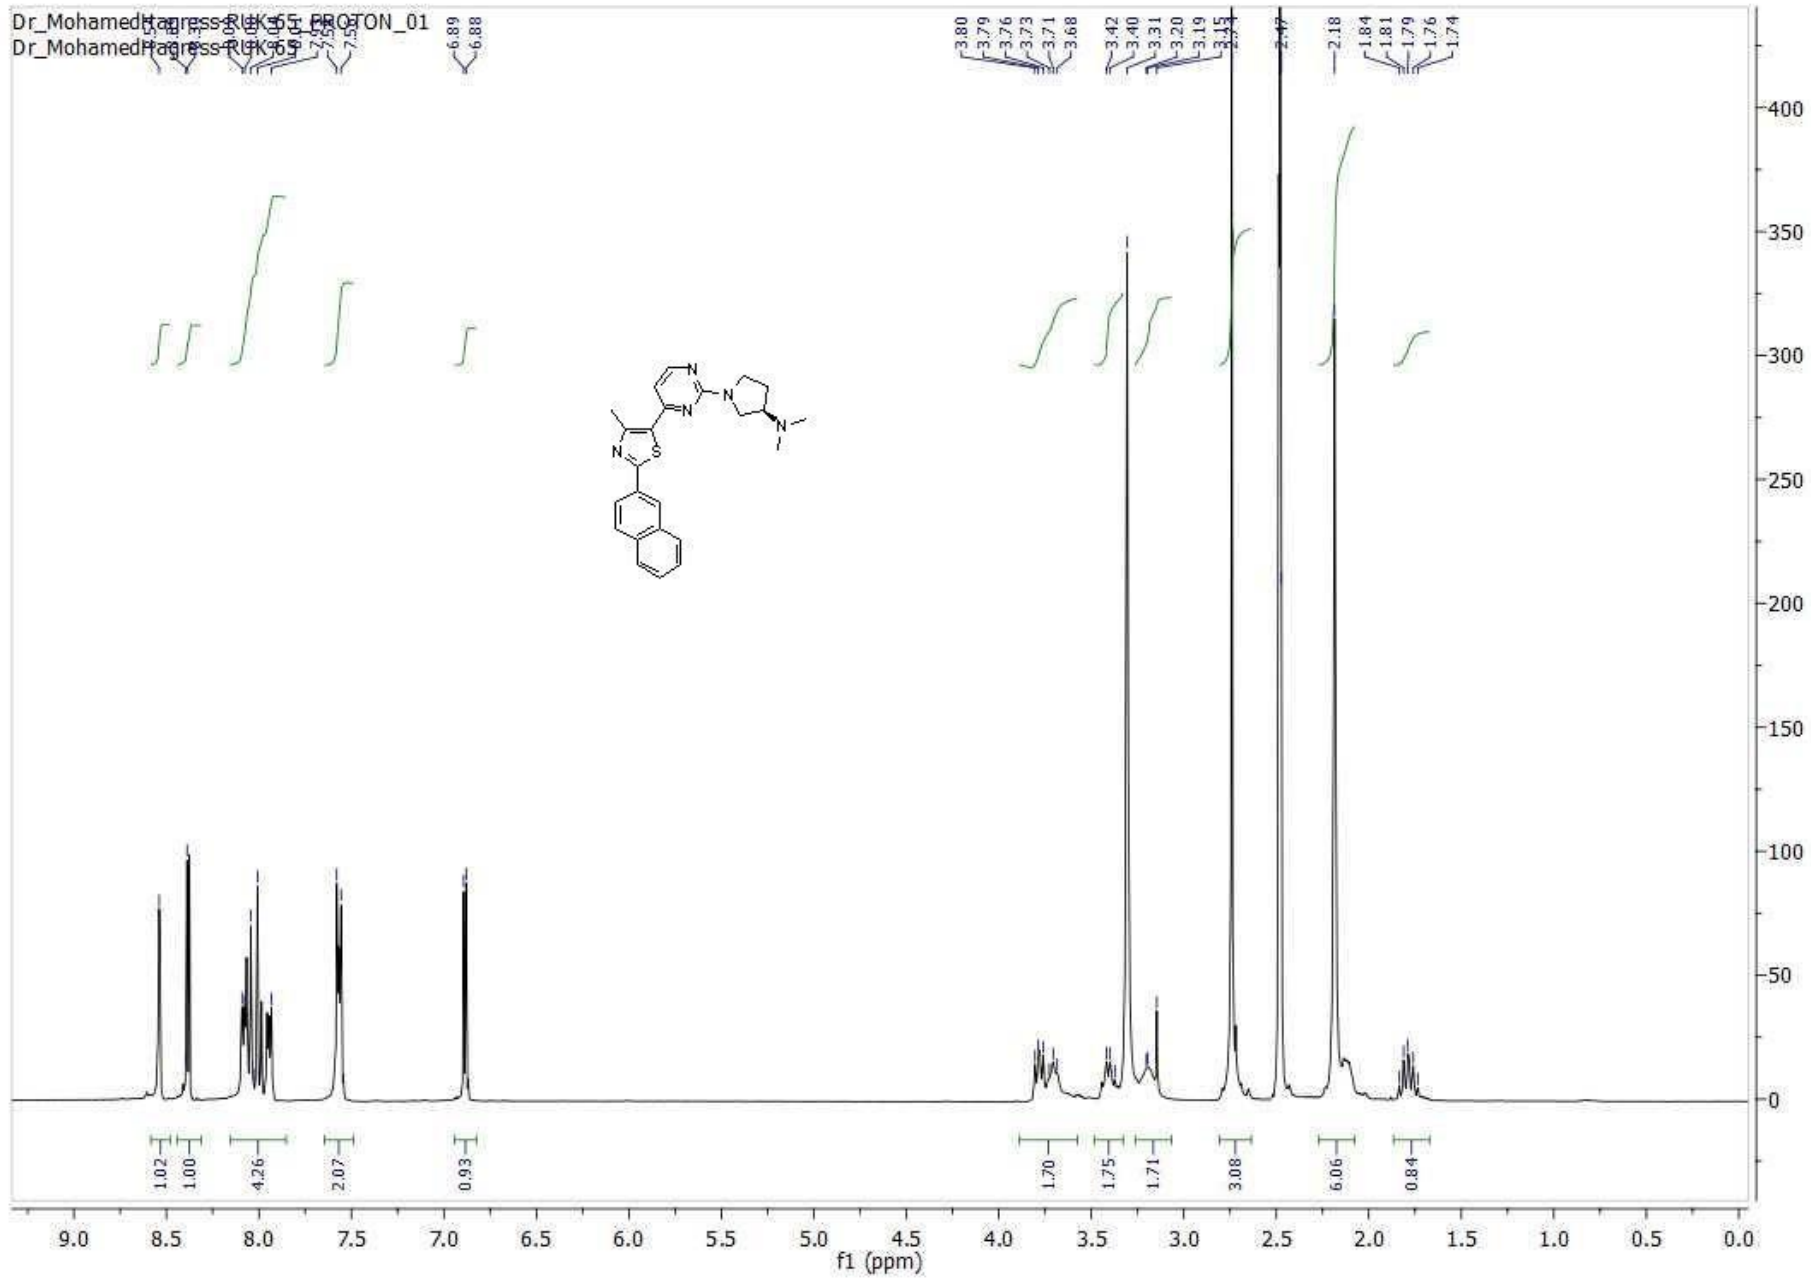



Dr\_MohamedHagress-RUK-65\_CARBON\_01  
Dr\_MohamedHagress-RUK-65

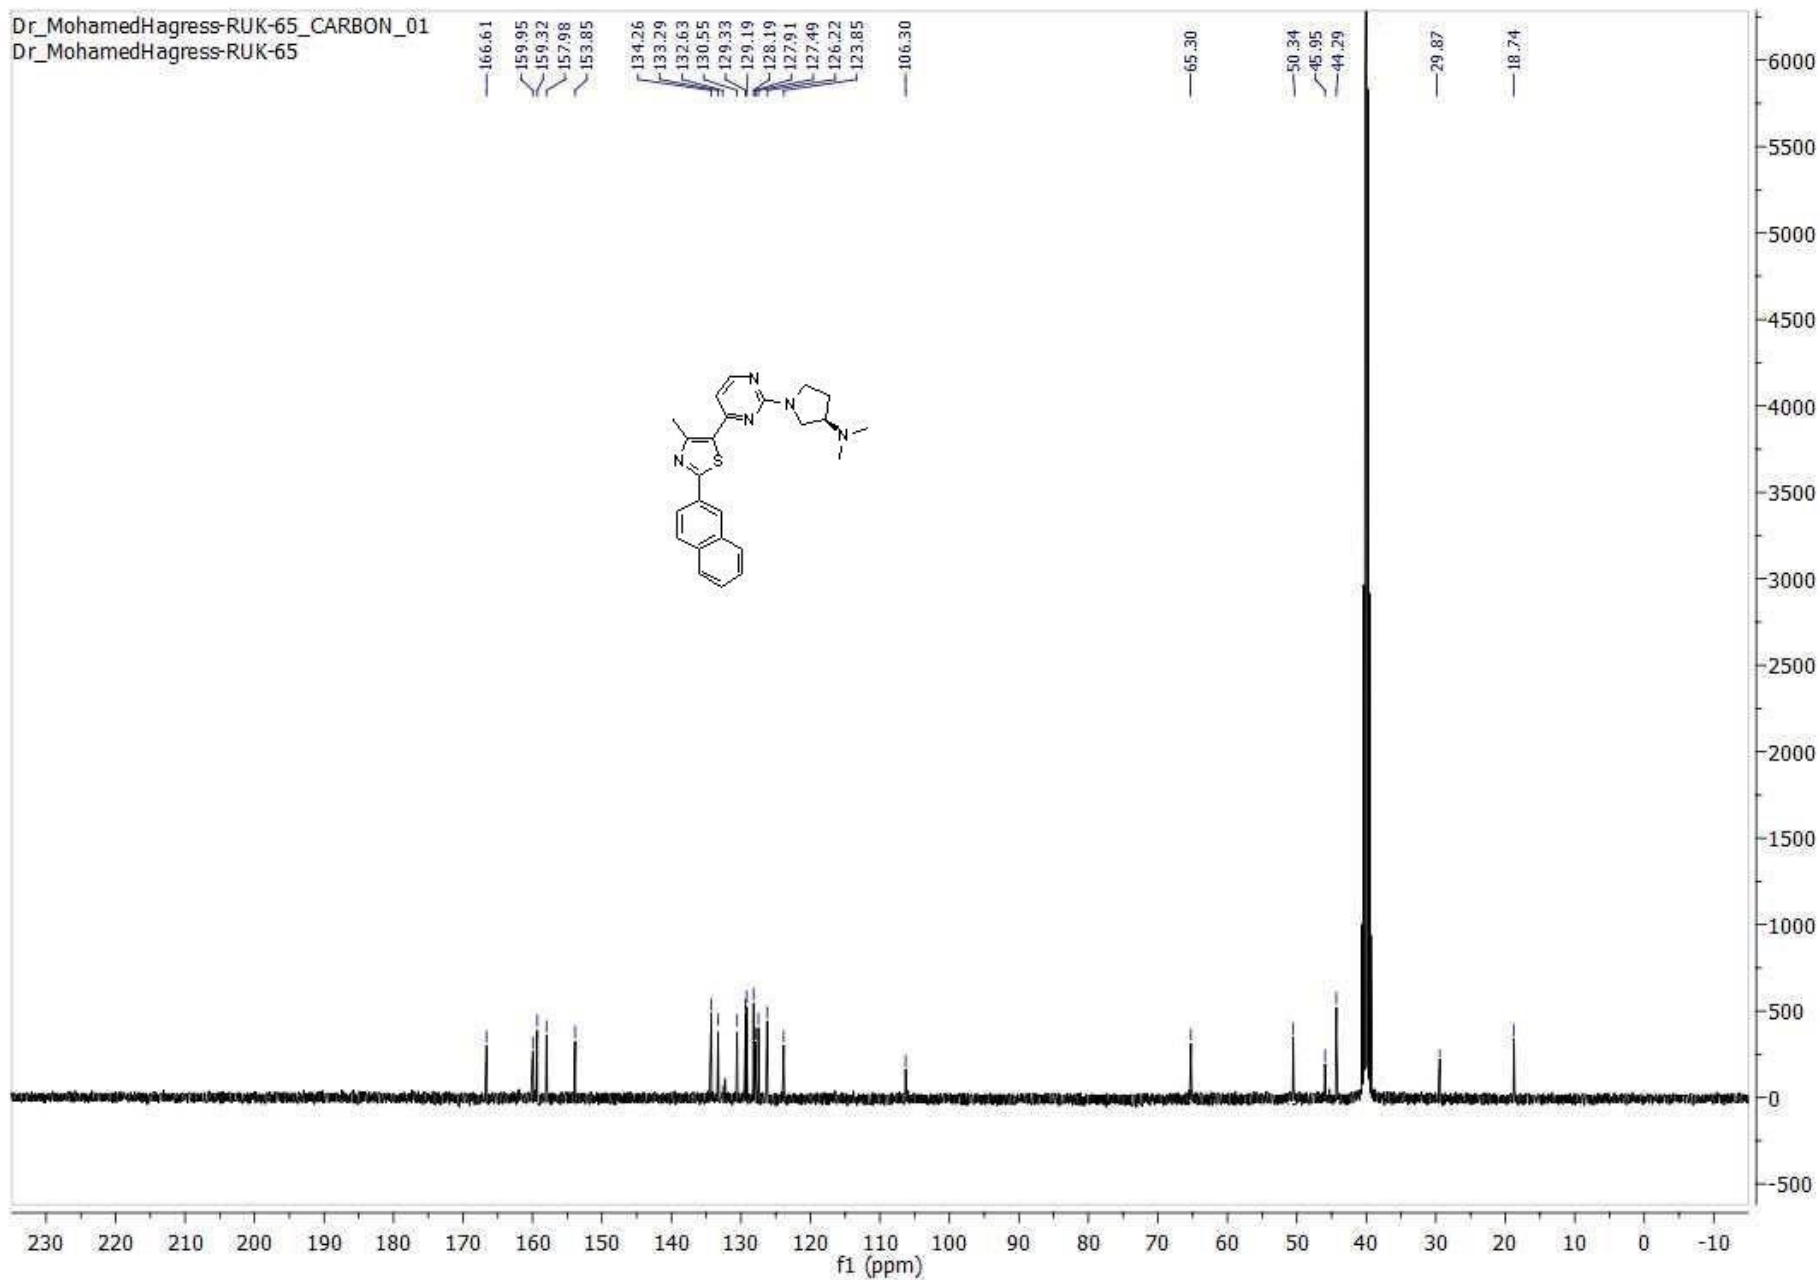

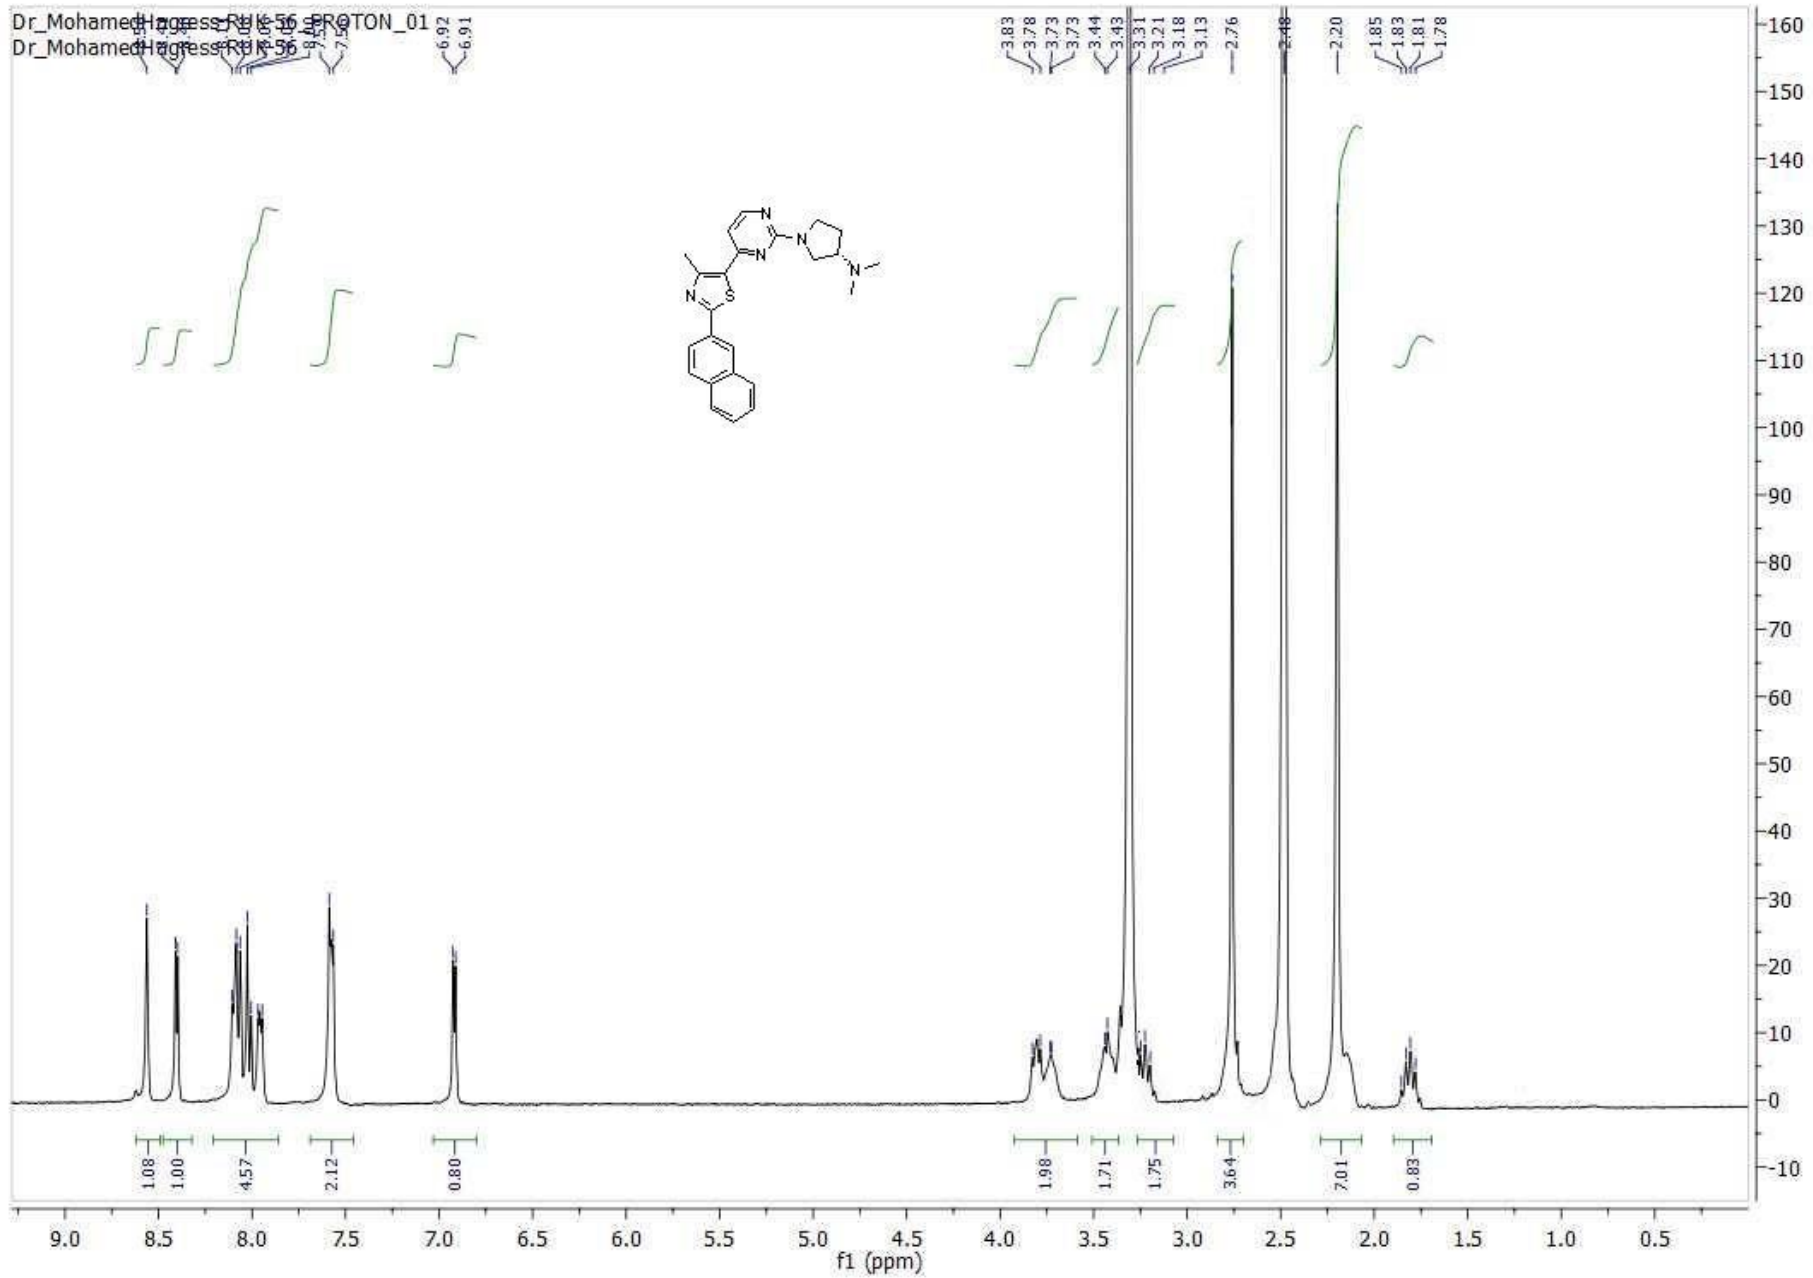

Dr\_MohamedHagress-RUK-56\_CARBON\_01  
Dr\_MohamedHagress-RUK-56

166.63  
159.96  
159.34  
157.99  
153.86  
134.26  
133.30  
130.55  
129.34  
129.19  
128.19  
128.14  
127.92  
127.50  
126.23  
123.85  
106.31

65.31  
51.05  
45.95  
44.29  
40.59  
40.38  
40.17  
39.96  
39.75  
39.54  
39.33  
29.47  
18.74

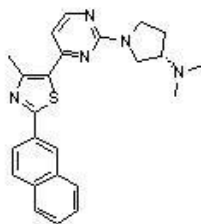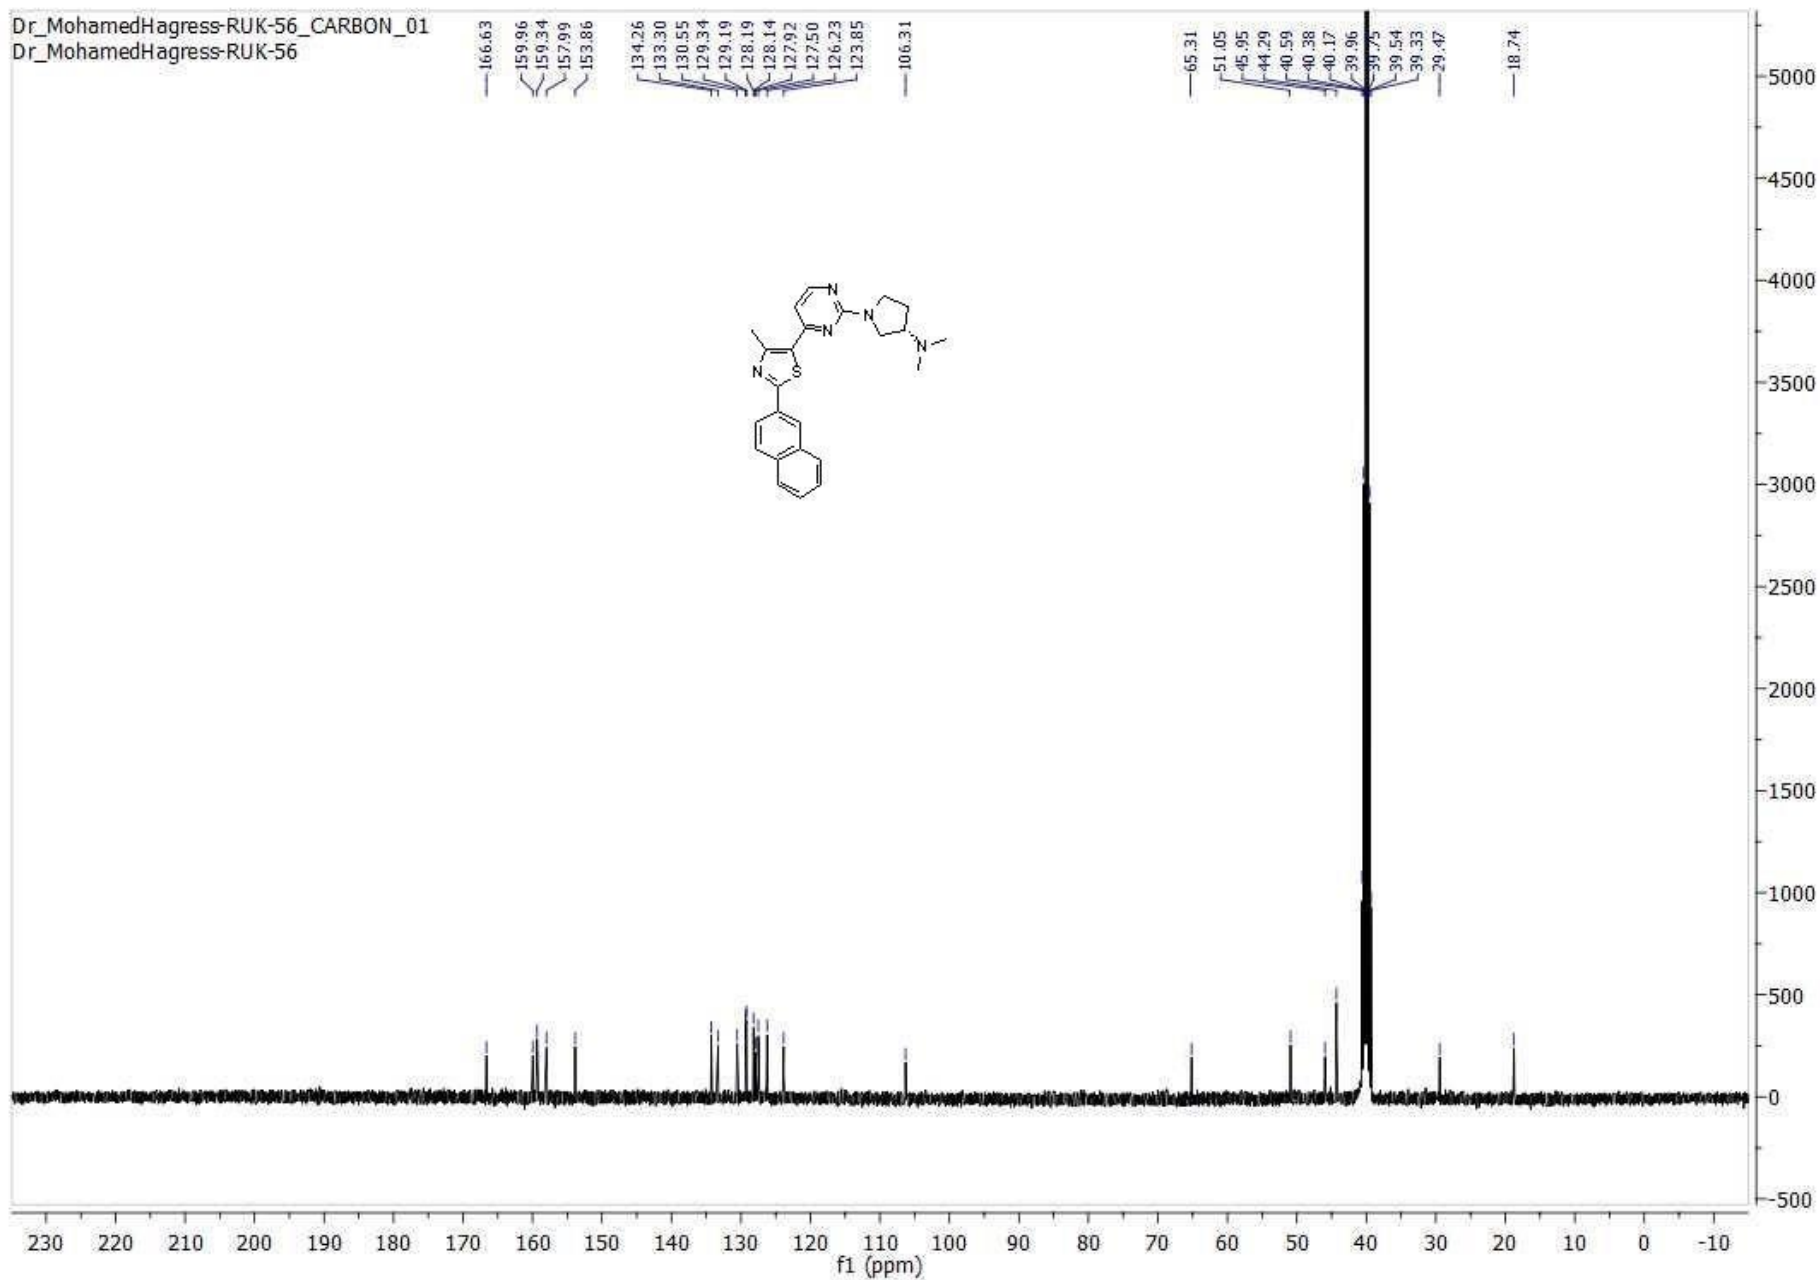



Dr\_MohamedHagress-RUK-59\_CARBON\_07  
Dr\_MohamedHagress-RUK-59

174.95  
165.94  
162.85  
159.00  
157.28  
153.86

134.26  
133.27  
132.62  
130.58  
129.36  
129.15  
128.22  
127.92  
127.54  
125.69  
123.84  
106.78

60.68  
47.68  
40.39  
40.18  
39.97  
31.76  
24.67  
18.69

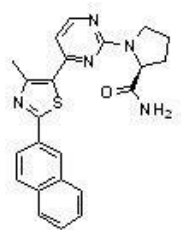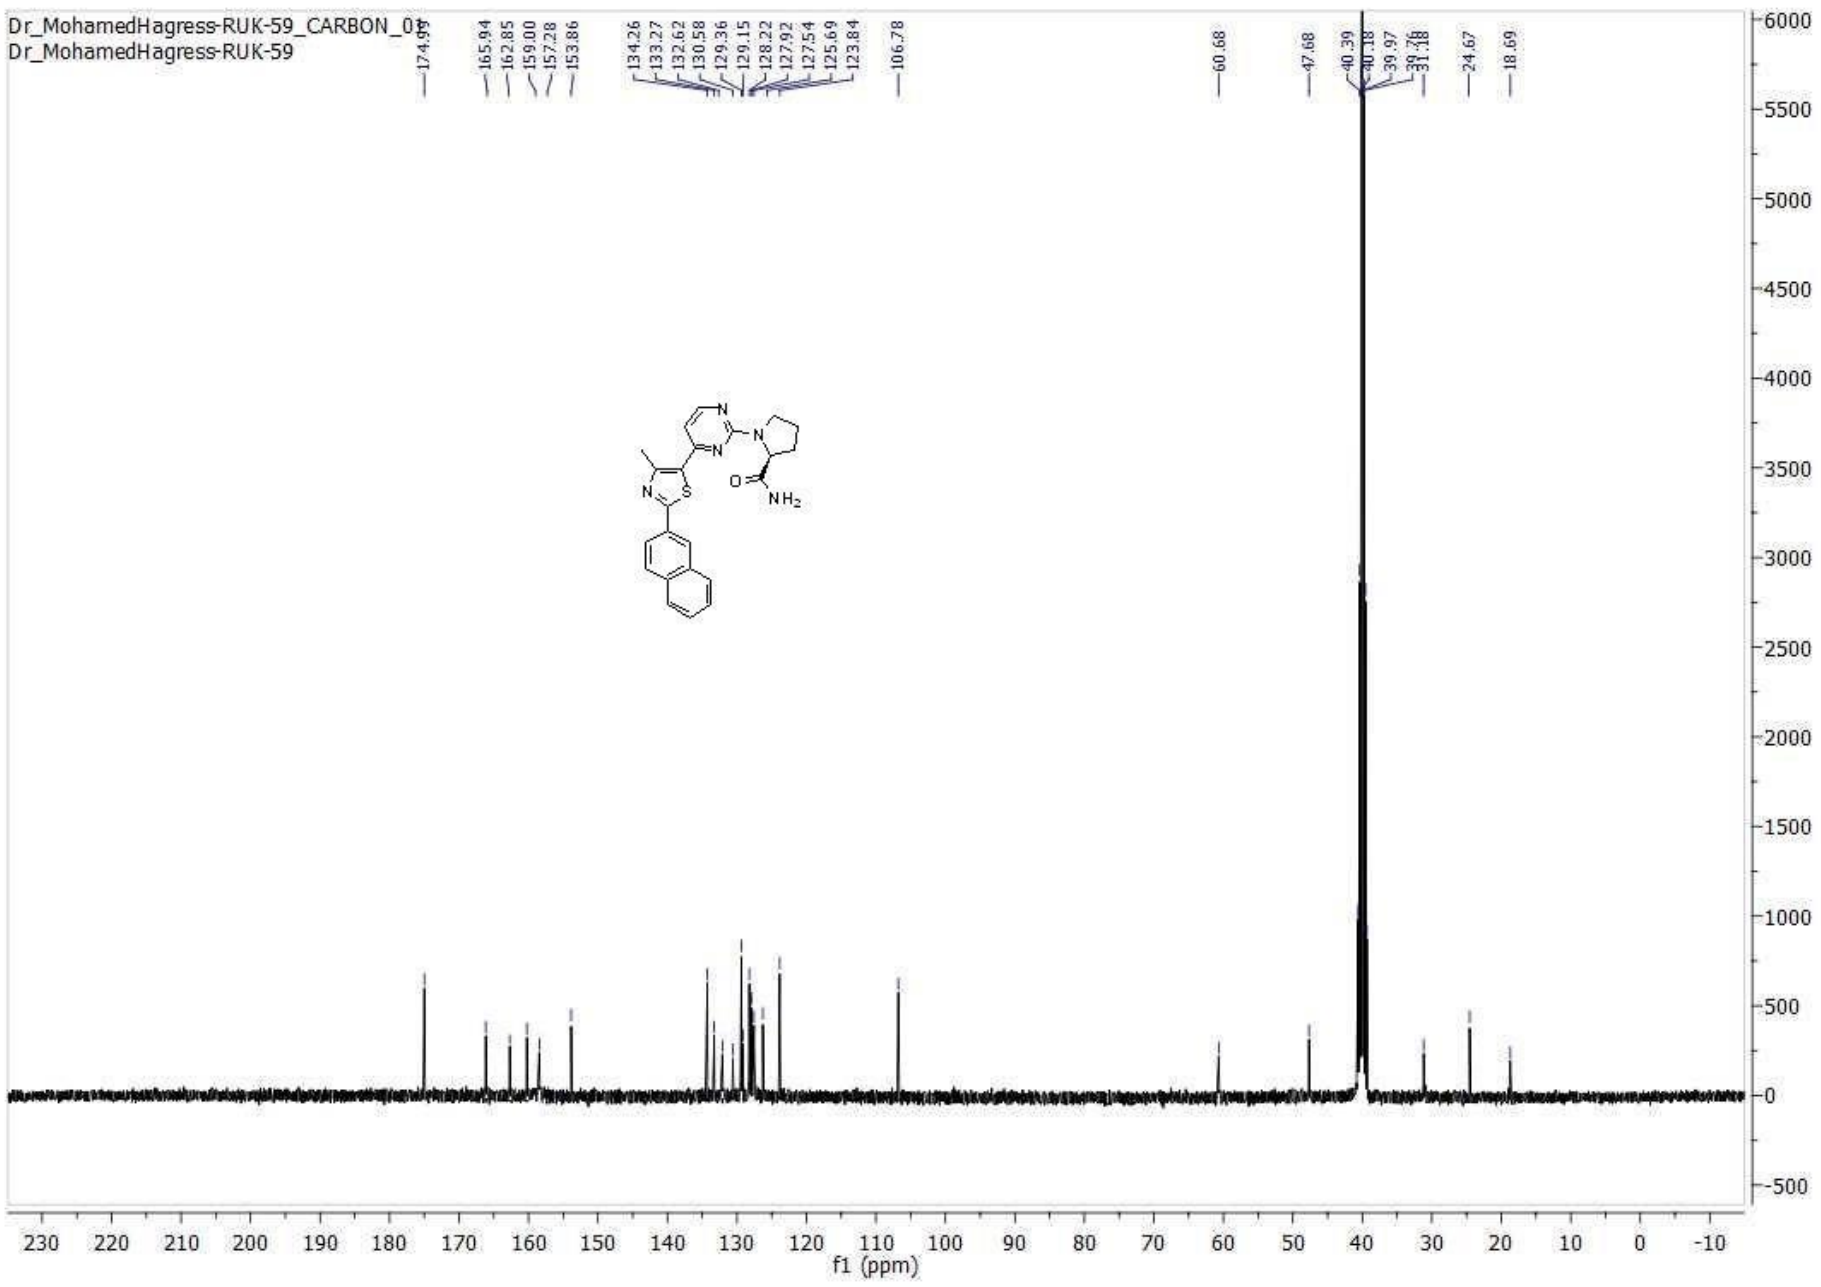

Dr\_Mohamedtagres-RUK-66-PRGTON\_04  
Dr\_Mohamedtagres-RUK-66

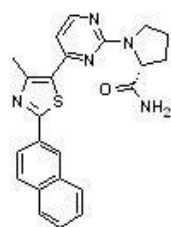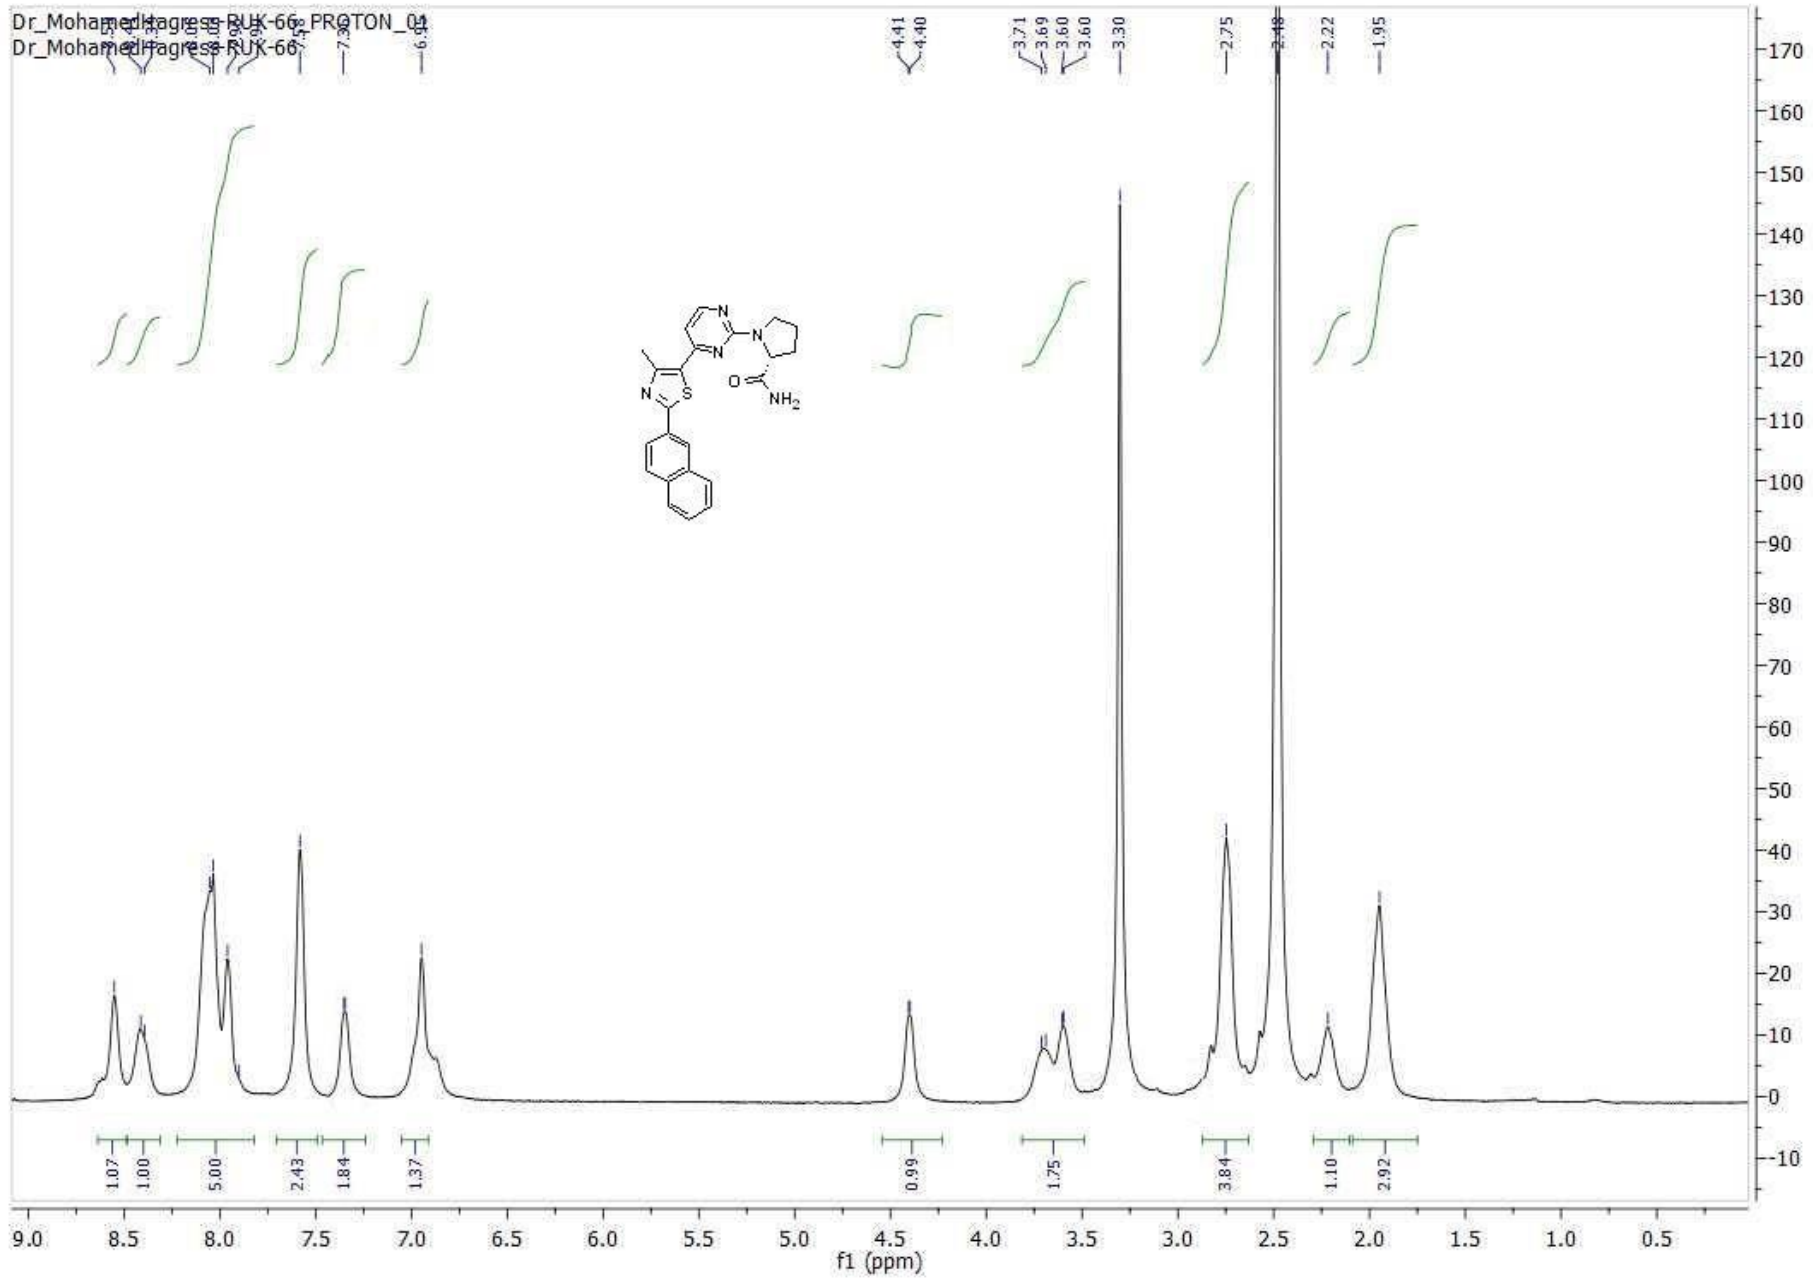

Dr\_MohamedHagress-RUK-66\_CARBON\_001  
Dr\_MohamedHagress-RUK-66

- 174.95
- 166.65
- 160.11
- 159.01
- 157.27
- 153.86
- 134.26
- 133.27
- 132.32
- 130.59
- 129.36
- 129.15
- 128.22
- 127.92
- 127.55
- 126.41
- 123.84
- 106.78

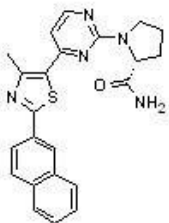

- 60.67
- 47.68
- 40.39
- 40.18
- 39.97
- 31.75
- 23.96
- 18.68

5500  
5000  
4500  
4000  
3500  
3000  
2500  
2000  
1500  
1000  
500  
0  
-500

230 220 210 200 190 180 170 160 150 140 130 120 110 100 90 80 70 60 50 40 30 20 10 0 -10  
f1 (ppm)
